# Supplementary material for: Prevalence and associations of behavioural risk factors with blood lipids profile in Lebanese adults: findings from WHO STEPwise NCD cross-sectional survey
Source: PubMed Central journal article supplement — BMJ Open. 2019 Aug 20;9(8):e026148. doi: 10.1136/bmjopen-2018-026148 (PMC6707694; doi:10.1136/bmjopen-2018-026148), 2019-08-20
Supplement: bmjopen-2018-026148.draft_revisions.pdf [file bmjopen-2018-026148.draft_revisions.pdf]

# BMJ Open

BMJ Open is committed to open peer review. As part of this commitment we make the peer review history of every article we publish publicly available.

When an article is published we post the peer reviewers' comments and the authors' responses online. We also post the versions of the paper that were used during peer review. These are the versions that the peer review comments apply to.

The versions of the paper that follow are the versions that were submitted during the peer review process. They are not the versions of record or the final published versions. They should not be cited or distributed as the published version of this manuscript.

BMJ Open is an open access journal and the full, final, typeset and author-corrected version of record of the manuscript is available on our site with no access controls, subscription charges or pay-per-view fees (<http://bmjopen.bmj.com>).

If you have any questions on BMJ Open's open peer review process please email [info.bmjopen@bmj.com](mailto:info.bmjopen@bmj.com)

# BMJ Open

## Prevalence and associations of behavioral risk factors with blood lipids profile in Lebanese adults: findings from the WHO STEPwise NCD Survey

|                               |                                                                                                                                                                                                                                                                                                                                                                                                                                                                                           |
|-------------------------------|-------------------------------------------------------------------------------------------------------------------------------------------------------------------------------------------------------------------------------------------------------------------------------------------------------------------------------------------------------------------------------------------------------------------------------------------------------------------------------------------|
| Journal:                      | <i>BMJ Open</i>                                                                                                                                                                                                                                                                                                                                                                                                                                                                           |
| Manuscript ID                 | bmjopen-2018-026148                                                                                                                                                                                                                                                                                                                                                                                                                                                                       |
| Article Type:                 | Research                                                                                                                                                                                                                                                                                                                                                                                                                                                                                  |
| Date Submitted by the Author: | 20-Aug-2018                                                                                                                                                                                                                                                                                                                                                                                                                                                                               |
| Complete List of Authors:     | Mansour, Megali; American University of Beirut Faculty of Health Sciences, EPHD<br>Tamim, Hani; American University of Beirut, Biostatistics Unit, Clinical Research Institute<br>EL Khoury, Christelle; Tufts University School of Medicine<br>Hwalla, Nahla; American University of Beirut<br>Chaaya, Monique; American University of Beirut<br>Farhat, Antoine ; Notre Dame University<br>Sibai, Abla; American University of Beirut, Department of Epidemiology and Population Health |
| Keywords:                     | PUBLIC HEALTH, EPIDEMIOLOGY, Cigarette Smoking, Blood lipids                                                                                                                                                                                                                                                                                                                                                                                                                              |
|                               |                                                                                                                                                                                                                                                                                                                                                                                                                                                                                           |

SCHOLARONE™  
Manuscripts

1  
2  
3 **Prevalence and associations of behavioral risk factors with blood lipids profile in**  
4  
5 **Lebanese adults: findings from the WHO STEPwise NCD Survey**  
6  
7

8 Magali Mansour<sup>1†</sup>, Hani Tamim<sup>2†</sup>, Christelle El Khoury<sup>3</sup>, Nahla Hwalla<sup>4</sup>, Monique Chaaya<sup>1</sup>,  
9 Antoine Farhat<sup>5</sup>, Abla M. Sibai<sup>1\*</sup>  
10  
11

12  
13 **Author affiliations**

14 <sup>1</sup> Department of Epidemiology and Population Health, Faculty of Health Sciences, American  
15 University of Beirut, P.O.Box 11-0236, Riad El-Solh, Beirut 1107 2020, Lebanon  
16

17 <sup>2</sup> Department of Internal Medicine , American University of Beirut-Medical Center, P.O.Box  
18 11-0236, Riad El-Solh, Beirut 1107 2020, Lebanon  
19

20 <sup>†</sup> Equal Contribution

21 <sup>3</sup> School of Medicine Department of Public Health, Tufts University, 136 Harrison Avenue,  
22 Boston, MA 02111, US  
23

24 <sup>4</sup> Faculty of Agriculture and Food Sciences, American University of Beirut, P.O.Box 11-0236,  
25 Riad El-Solh, Beirut 1107 2020, Lebanon  
26

27 <sup>5</sup> Faculty of Nursing and Health Sciences, Notre Dame University, Lebanon  
28  
29  
30  
31  
32

33 **\*Corresponding author:**

34 **Abla M. Sibai**  
35  
36

37 Epidemiology and Population Health  
38 Faculty of Health Sciences  
39 American University of Beirut  
40 PO Box 11-0236  
41 Beirut-Lebanon  
42 Tel: +961-1-350000 ext. 4647  
43 Fax: +961-1-744470  
44 Email: am00@aub.edu.lb  
45  
46  
47  
48  
49  
50  
51  
52  
53  
54  
55  
56  
57  
58  
59  
60

1  
2  
3 **Keywords:** Cardiovascular disease, cigarette smoking, alcohol consumption, physical  
4  
5 inactivity, blood lipids, Lebanon  
6  
7

8  
9 **Word count (excluding title page, references, tables and figures):** 2358  
10  
11  
12  
13  
14  
15  
16  
17  
18  
19  
20  
21  
22  
23  
24  
25  
26  
27  
28  
29  
30  
31  
32  
33  
34  
35  
36  
37  
38  
39  
40  
41  
42  
43  
44  
45  
46  
47  
48  
49  
50  
51  
52  
53  
54  
55  
56  
57  
58  
59  
60

For peer review only

## Abstract

**Objective:** To examine associations of behavioral risk factors, including cigarette smoking, physical activity and alcohol consumption, with blood lipids profile.

**Design and participants:** Data drawn from a cross-sectional study involving participants aged 18 years and over (n = 363) from the national WHO Stepwise Nutrition and Non-communicable Disease Risk Factor survey in Lebanon.

**Measures:** Demographic characteristics, behaviors and medical history were obtained from participants by questionnaire. Lipid levels were measured by analysis of fasting blood samples (serum total cholesterol (TC), triglycerides (TG), very low-density lipoprotein (VLDL), low-density lipoprotein cholesterol (LDL-C) and high-density lipoprotein cholesterol (HDL-C).

**Results:** Current cigarette smoking, alcohol consumption and low physical activity were prevalent among 33.3%, 15.4%, and 41.6% of the sample, respectively. Abnormal levels of total cholesterol, triglyceride (TG), very low density lipoprotein (VLDL), low density lipoprotein (LDL-C), and high density lipoprotein were observed for 54.4%, 31.4%, 29.2%, 47.5% and 21.8% of participants, respectively. Adjusting for potential confounders, cigarette smoking was positively associated with higher odds of TG and VLDL (OR=3.82; 95% CI 1.50-9.71; and 4.75; 95% CI 1.10-6.72) with a significant dose-response relationship (p-value for trend=0.019 and 0.039, respectively). Physical activity and alcohol intake did not associate significantly with any blood lipid parameter. **Conclusion:** The demonstrated positive association between smoking and adverse lipoprotein levels in this study population in Lebanon lays further evidence for clinical practitioners, public health professionals and dieticians in the development of preventive strategies among subjects with high risk of CVDs

### Strengths and limitations

- A nationwide survey administered in Lebanon with a population distribution similar to that in national records.
- Attention to associations between behavioral factors and intermediary metabolic conditions along the causal pathway for CVD informs work towards development of tailored preventive strategies for high risk individuals.
- Whilst data on smoking and physical activity were sufficiently detailed, measures of exposure to alcohol consumption lacked information on intensity and type, and may be prone to misclassification bias.

## Introduction

The prevalence of cardiovascular diseases (CVD) is growing worldwide, and has reached epidemic levels, affecting both developed and developing countries.<sup>1</sup> The Middle East and North Africa (MENA) countries represent a region which is now facing a fast rate of development and urbanization, with rates of chronic diseases increasing at an alarming rate and exceeding at times those of developed countries.<sup>2</sup> In Lebanon, a small middle-income country at the Eastern Mediterranean shore, data from the World Health Organization (WHO) indicate that the proportional mortality from CVD alone is 45%, making it the highest among all non-communicable diseases (NCDs).<sup>3</sup> With a population estimate of around 4.2 million and a Gross Domestic Product (GDP) of 7,315 US Dollars per capita, Lebanon is characterized by a high urbanization rate (87%), a growing trend towards survival in later life, coupled with westernization and modernization in lifestyle and higher uptake of NCD risk factors.<sup>4</sup>

The primary goal in the prevention and management of CVD is to identify and modify the underlying risk behaviors that are amenable to intervention, namely, cigarette smoking, physical inactivity and alcohol consumption. Associations between these factors and CVD risk through their effect on blood lipid levels have been widely examined in the western literature. Studies have shown that smokers are 2-4 times more at risk of developing heart disease than nonsmokers.<sup>5</sup> and the number cigarettes smoked/day independently predicts higher levels of Total Cholesterol (TC), Low Density Lipoprotein-Cholesterol (LDL-C), and Triglycerides (TG).<sup>6</sup> Also, smoking cessation has been shown to improve High Density Lipoprotein-Cholesterol (HDL-C) levels.<sup>7</sup> Cigarette smoking is described as a strong inflammation mediator and a key promoter in the atherosclerotic process. Similarly, the anti-inflammatory effect of frequent physical activity has been noted to be the reason behind reduced heart disease risk among physically active individuals.<sup>8</sup> Regular physical activity

1  
2  
3 with weight reduction has a large beneficial impact on the lipoproteins profile of adult men  
4 and women,<sup>9</sup> by increasing plasma volume, decreasing blood thickness, and thus reducing  
5 LDL-C concentrations.<sup>10</sup> Also, systematic reviews and meta-analysis of intervention studies  
6  
7  
8 have shown that heavy alcohol drinking results in an elevation in triglyceride levels, while  
9 moderate consumption increases circulating levels of HDL-C.<sup>11</sup>  
10  
11  
12

13 Much of the above evidence comes from studies conducted in North American and  
14 European countries and to a lesser extent from the Far East, mostly among Japanese and  
15 Korean population. Arab populations including the Lebanese have quite different risk  
16 behaviors, varied dietary habits and risk profile,<sup>12</sup> and studies evaluating the association  
17 between behaviors and intermediary variables along the causal pathway of CVD  
18 including lipid levels remain scarce in the region. Compared with other neighboring  
19 countries, Lebanon was shown to have one of the highest prevalence estimates of  
20 metabolic syndrome,<sup>13</sup> and has been witnessing high rates of smoking, among both  
21 adult men and women aged 18 years and over (42.9% and 27.5%, respectively).<sup>14</sup> Using  
22 data from a nation-wide population-based survey of Lebanese adults, this study aims to  
23 examine the relation between behavioral risk factors including cigarette smoking,  
24 physical activity and alcohol consumption with serum lipids and lipoproteins, while  
25 taking into account several potential confounding factors. Findings from this study  
26 inform prevention strategies among subjects with high risk of CVD in the country.  
27  
28  
29  
30  
31  
32  
33  
34  
35  
36  
37  
38  
39  
40  
41  
42  
43  
44  
45  
46  
47  
48  
49  
50  
51  
52  
53  
54  
55  
56  
57  
58  
59  
60

## Methods

### Study design and participants

The data presented in this study are derived from the WHO Nutrition and Non-Communicable Diseases Risk Factor (NNCD-RF) cross-sectional household survey conducted in Lebanon in 2009.<sup>15</sup> Using multi-stage stratified cluster study design, the sampling was based on the age-sex distribution of the Lebanese population as provided by the Central Administration for Statistics. One adult was randomly selected from each household using Kish methodology.<sup>16</sup> Pregnant and lactating women and individuals with mental disabilities were excluded. Survey participants aged 18 years and above and free from known history of hyperlipidemia and diabetes in the first phase of the study (n = 1,331) were approached to undergo a biochemical assessment, of which 363 provided written consent and gave fasting blood samples. Further details on the design and sample of the survey are published elsewhere.<sup>4</sup> The study protocol was approved by the Institutional Review Board of the American University of Beirut (AUB), and informed consent was taken from all participants.

### Data collection

The data collection procedure followed the WHO STEPwise approach to Surveillance,<sup>17</sup> and included the following three steps: Step 1 Questionnaire, whereby information about socio-demographic characteristics, NCDs and NCD risk factors were collected through face-to-face interviews; Step 2 in which anthropometric and blood pressure measurements were taken using standardized techniques and calibrated equipment; and finally, Step 3 in which biochemical analysis for assessment of the blood lipid profile was performed on blood samples collected after an overnight fast. Serum was centrifuged on site and shipped on dry ice to the AUB Laboratory.

### Measures of blood lipids

Levels of blood lipids including TC, TG, very low density lipoprotein (VLDL), LDL-C and HDL-C were analyzed using the Vitros 350 analyzer, an enzymatic spectrophotometric technique. The inter-assay variation of measurements did not exceed 4%. Quality control was performed within each run using standard performance verifier solutions provided by Ortho-Clinical Diagnostics. Analyses were conducted in duplicates, and the average value was utilized in the analysis. Based on the Adult Treatment Panel III guidelines,<sup>18</sup> the cutoff points used for the definition of risk levels of TC, TG, VLDL, LDL-C and HDL-C were  $\geq 200$ ,  $\geq 150$ ,  $\geq 30$ ,  $\geq 130$  and  $\leq 40$  mg/dl, respectively.

### Behavioral risk factors and other measures

Behavioral risk factors examined in this study included cigarette smoking, physical activity, and alcohol consumption. Cigarette smoking status (never, past and current) and intensity (number of cigarettes smoked/day) were assessed. Intensity was later categorized into three levels according to number of cigarettes/day (1 to 19, 20 to 39 and  $\geq 40$ ). The short version of the International Physical Activity Questionnaire was used to assess physical activity among participants.<sup>19</sup> Three categories of physical activity (low, moderate, and high) were assigned based on METs-min/week (MET-min being the product of the resting metabolic rate for an activity and the number of minutes taken to perform it). Alcohol consumption was assessed as a dichotomous variable (yes/no) based on consumption of at least 1 drink/week in the year prior to the survey. Covariates of interest included total daily caloric intake, which was estimated based on the food frequency questionnaire and divided into tertiles. In addition, gender, age (18-29, 30-39, 40-49, 50-59, and  $\geq 60$ ), marital status (single, married, divorced/widowed), education level (complementary or less, secondary/technical, university and above), and occupational status (student/volunteer, working, does not work/housewife/retired) were considered as potential covariates.

## Patient and Public Involvement

This study is based on secondary data analyses. The original data collection tool was adapted from the WHO STEPwise approach to NCD risk factor surveillance,<sup>17</sup> that did not directly involve patients or the public in outcome development or conduct of the study. However, we are engaging with stakeholders to disseminate the findings on the burden of tobacco consumption and its association with various health-related outcomes to the public at large.

## Statistical analysis

Means, standard deviations (SD) and frequencies were used to describe the various socio-demographic, behavioral, nutritional and clinical characteristics of the participants. The associations between each of the three behavioral risk factors and levels of the different blood lipids were examined using multiple logistic regression analysis. Unadjusted and adjusted odds ratios (ORs) and their 95% confidence intervals (CIs) controlling for age, gender, education, marital status and caloric intake were estimated. Test for trend with increasing number of daily amount of cigarette smoked was also conducted, and a two-sided p-value < 0.05 was considered significant. The Statistical Package for the Social Sciences 22.0.1 (SPSS Inc., Chicago, IL, USA) was used for all computations.

## Results

The socio-demographic and health-related characteristics of the study sample are summarized in Table 1. The sample was equally divided by gender (49.9% females and 50.1% males), with a mean age of  $39.2 \pm 15.2$  years (range 18 to 92 years). The majority were married (60.6%), and close to half of the participants were employed (52.3%) at the time of the study, with an almost equal distribution across the various educational levels. Ever smokers constituted 37.4% of the sample. 41.6% were classified as being engaged in low-intensity

1  
2  
3 physical activity, and 15.4% reported current alcohol consumption at least once per week.

4  
5 The sample consumed  $2656 \pm 1249$  Kcal/day on average. Abnormal levels of TC, TG,  
6  
7 VLDL, LDL-C, and HDL-C were observed for 55.4%, 31.4%, 29.2%, 47.5% and 21.8% of  
8  
9 the participants, respectively.

10  
11  
12 Insert table 1 around here

13  
14  
15  
16 Tables 2a and 2b show the unadjusted and adjusted ORs for the association between  
17  
18 behavioral risk factors and blood lipids levels. Out of all the relationships examined, only  
19  
20 cigarette smoking showed a significant association with blood lipids. Associations were  
21  
22 significant for those consuming more than 40 cigarette/day compared to non-smokers, with  
23  
24 unadjusted ORs of 5.03 for TG, 4.09 for VLDL and 3.02 for HDL-C. Adjusting for potential  
25  
26 confounders, the associations maintained statistical significance for TG and VLDL, with an  
27  
28 adjusted OR 3.82 (95% CI 1.50- 9.71) and 4.75 (95% CI 1.10-6.72), respectively. Results  
29  
30 showed a dose-response relationship with increasing number of cigarettes consumed for (p-  
31  
32 value for trend = 0.019 and 0.039, respectively). Physical activity and alcohol intake were not  
33  
34 associated with any of the blood lipid parameters.  
35  
36  
37  
38  
39  
40  
41  
42  
43  
44  
45

46  
47  
48  
49  
50  
51  
52  
53  
54  
55  
56  
57  
58  
59  
60  
Insert tables 2a and 2b around here

## Discussion

Our results showed that heavy cigarette smoking exceeding 40 cigarettes/day is associated with increased levels of TG and VLDL, with findings showing significant dose-response relationships with increasing number of cigarettes smoked per day. However, there were no consistent associations between physical activity and alcohol consumption with fasting blood

1  
2  
3 lipids profile. To our knowledge, this is the first study in Lebanon to explore these  
4  
5 associations, based on objectively measured lipid parameters and using standardized  
6  
7 laboratory techniques and tools, while taking into consideration the effect of potential  
8  
9 confounders.

10  
11  
12 There are strong indicators in the literature that the deleterious effect of cigarette smoking on  
13  
14 heart disease and atherosclerosis is partially explained by the effect of smoking on the  
15  
16 concentration of blood lipids and lipoproteins. Our study confirms the results of earlier cross-  
17  
18 sectional studies showing that the association between smoking and lipoproteins are observed  
19  
20 in the levels of TG, VLDL and HDL-C, <sup>6,20,21</sup> with the impact on lipid levels increasing with  
21  
22 increase in the number of cigarettes smoked/day in a dose dependent relationship. <sup>22,23</sup> Our  
23  
24 observation of the largest effect of cigarette smoking on lipid parameters being seen in those  
25  
26 who smoked > 40 cigarettes/day is also consistent with Chen et al. study comprising of 1,164  
27  
28 men in Taiwan. <sup>24</sup> One popular mechanism by which smoking affects lipoproteins is that  
29  
30 cigarette particulate matter alters catecholamine release—and thus free fatty acid release,  
31  
32 which in turn contributes to the accumulation of the LDL-C concentrations and to lower  
33  
34 levels of HDL-C in the blood. <sup>25</sup> The association between cigarette smoking and the increase  
35  
36 in TG can also be explained by the decrease in the activity of the lipoprotein lipase among  
37  
38 smokers thus disrupting lipid and lipoprotein metabolism. Furthermore, smoking cessation  
39  
40 was found to improve lipid and lipoprotein levels in observational studies and randomized  
41  
42 clinical trials. <sup>7,26</sup> Taken together, the totality of evidence from these studies and our data-  
43  
44 including consistency upon replication across various studies, the dose-response relationship,  
45  
46 the magnitude and significance of association, biological plausibility as well as effects of  
47  
48 smoking cessation on lipoprotein levels, supports a strong relationship between smoking and  
49  
50 lipid profiles.  
51  
52  
53  
54  
55  
56  
57  
58  
59  
60

1  
2  
3 In our study, physical activity and alcohol consumption did not appear to be associated with  
4 lipid parameters. The literature suggests that physical activity increases the level of HDL-C  
5 and has beneficial effects on lipoprotein particle size and number.<sup>27</sup> Also, moderate intensity  
6 exercise is known to have a more favorable effect on blood lipids since it allows the use of  
7 lipids as a fuel source which implies an increase in the uptake and oxidation of the lipids in  
8 the skeletal muscle.<sup>27</sup> As for the relationship between alcohol consumption and lipid  
9 parameters in the general population, findings have been less consistent in the literature, with  
10 some but not all showing an effect on higher HDL-C levels and lower non-HDL-C levels.<sup>28,29</sup>  
11 Indeed, the effect of alcohol on CVD including coronary artery disease, stroke and  
12 myocardial infarction appears to be biphasic showing a J or U-shaped relationship based on  
13 the amount of alcohol consumed,<sup>29,30</sup> with lower CVD mortality risks by light to moderate  
14 alcohol consumption and increased risk by heavy alcohol intake.<sup>31</sup> The discrepancy between  
15 our results with those in the literature may be due to differences in race/ethnicity and genetic  
16 variations known to play a significant role in lipid metabolism,<sup>32</sup> or alternatively, owing to  
17 measurement error in our assessment of alcohol consumption, based on self-reports of a  
18 dichotomous variable. Lipid profiles are influenced by the type of alcohol consumed and by  
19 drinking frequency and patterns.

20 Some other limitations should be taken into consideration when analyzing the results of our  
21 study. Because the study used a cross-sectional design, the results only imply associations  
22 and findings cannot establish causal relationships. The number of participants who agreed to  
23 give blood samples was relatively small; however, these responders were comparable to  
24 non-responders on a number of socio-demographic characteristics except for marital status  
25 (61% of responders vs. 50% of non-responders were married). As mentioned earlier,  
26 measures of exposure were self-reported which can introduce some misclassification error.  
27 Whilst this may have been problematic in case of alcohol consumption that lacked detailed

1  
2  
3 data on intensity and type, measurement of cigarette smoking and physical activity were more  
4  
5 detailed and reliable. Information on cigarette smoking in our study included the amount of  
6  
7 cigarettes smoked and the standardized IPAQ was used to assess physical activity.  
8

9 To conclude, our results suggest that smoking is associated with adverse levels of  
10  
11 lipoprotein, notably TGs and VLDL among Lebanese men and women. The role of  
12  
13 lipoproteins in atherogenesis has been clearly defined, and controlling for blood lipid levels  
14  
15 decreases the risk of heart and many other chronic diseases. Our findings lay further evidence  
16  
17 for clinical practitioners, public health professionals and dieticians regarding the potential  
18  
19 benefits of smoking cessation in their pursuit to curb the burden of hyperlipidemia and CVD  
20  
21 at the individual and population level. The overall high rate of smoking behavior in Lebanon  
22  
23 among both men and women, coupled with lack of dedicated funds and weak implementing  
24  
25 power for the enforcement of the tobacco control law, are likely to adversely impact on the  
26  
27 healthcare bill in the country. Further studies with larger sample size that examine the  
28  
29 association of combination patterns of poor lifestyle factors on lipid profile among Lebanese  
30  
31 adults are warranted.  
32  
33  
34  
35  
36  
37  
38  
39  
40  
41  
42  
43  
44  
45  
46  
47  
48  
49  
50  
51  
52  
53  
54  
55  
56  
57  
58  
59  
60

**Contributors**

AMS conceived the study. MM did the analyses and wrote first draft of the paper. HT and AMS supervised the conduct of analyses and contributed substantially to the write-up of the paper. CK, NH, MC and AF provided statistical advice and contributed to the paper revision. All authors read and approved the final manuscript.

**Funding statement**

The original study conduct was funded by the World Health Organization (WHO) - Lebanon.

**Data sharing statement**

The database set was available for all authors of the study, and will be available for other non-commercial researchers on request.

**Declaration of conflicting interests**

The authors declare that there is no conflict of interest.

## REFERENCES

1. World Health Organization. Cardiovascular diseases. Fact sheet N°317. 2015.
2. Sibai AM, Nasreddine L, Mokdad AH, Adra N, Tabet M, Hwalla N. Nutrition transition and cardiovascular disease risk factors in Middle East and North Africa countries: reviewing the evidence. *Annals of Nutrition and Metabolism*. 2010;57:193-203.
3. World Health Organization. Non-communicable Diseases Country Profiles 2014.
4. Naja F, Nasreddine L, Itani L, Adra N, Sibai A, Hwalla N. Association between dietary patterns and the risk of metabolic syndrome among Lebanese adults. *European Journal of Nutrition*. 2013;52:97-105.
5. US Department of Health and Human Services. The health consequences of smoking—50 years of progress: a report of the Surgeon General. Atlanta (GA): The health consequences of smoking—50 years of progress: a report of the Surgeon General: Centers for Disease Control and Prevention (US), National Center for Chronic Disease Prevention and Health Promotion, Office on Smoking and Health; 2014.
6. Gossett LK, Johnson HM, Piper ME, Fiore MC, Baker TB, Stein JH. Smoking intensity and lipoprotein abnormalities in active smokers. *Journal of Clinical Lipidology*. 2009;3:372-8.
7. Gepner AD, Piper ME, Johnson HM, Fiore MC, Baker TB, Stein JH. Effects of smoking and smoking cessation on lipids and lipoproteins: outcomes from a randomized clinical trial. *American Heart Journal*. 2011;161:145-51.
8. [8] Abramson JL, Vaccarino V. Relationship between physical activity and inflammation among apparently healthy middle-aged and older US adults. *Archives of Internal Medicine*. 2002;162:1286-92.
9. [9] Barengo NC, Kastarinen M, Lakka T, Nissinen A, Tuomilehto J. Different forms of physical activity and cardiovascular risk factors among 24–64-year-old men and women in Finland. *European Journal of Cardiovascular Prevention & Rehabilitation*. 2006;13:51-9.
10. [10] Thompson PD, Crouse SF, Goodpaster B, Kelley D, Moyna N, Pescatello L. The acute versus the chronic response to exercise. *Medicine and Science in Sports and Exercise*. 2001;33:S438-45.
11. Brien SE, Ronksley PE, Turner BJ, Mukamal KJ, Ghali WA. Effect of alcohol consumption on biological markers associated with risk of coronary heart disease: systematic review and meta-analysis of interventional studies. *BMJ*. 2011;342:d636.
12. Naja F, Nasreddine L, Itani L, Chamieh MC, Adra N, Sibai AM, et al. Dietary patterns and their association with obesity and sociodemographic factors in a national sample of Lebanese adults. *Public Health Nutrition*. 2011;14:1570-8.
13. Sibai AM, Obeid O, Batal M, Adra N, El Khoury D, Hwalla N. Prevalence and correlates of metabolic syndrome in an adult Lebanese population. *CVD Prevention & Control*. 2008;3:83-90.

14. Sibai AM, Iskandarani M, Darzi A, Nakkash R, Saleh S, Fares S, et al. Cigarette smoking in a Middle Eastern country and its association with hospitalisation use: a nationwide cross-sectional study. *BMJ open*. 2016;6:e009881.
15. Sibai AM, Hwalla N. WHO STEPS Chronic Disease Risk Factor Surveillance: Data Book for Lebanon. In: Beirut AUo, editor. 2010.
16. Lavrakas PJ. *Encyclopedia of survey research methods*: Sage Publications; 2008.
17. World Health Organization (WHO). Noncommunicable diseases and their risk factors- STEPS Manual. <http://www.who.int/ncds/surveillance/steps/manual/en/>
18. National Cholesterol Education Program Adult Treatment Panel III. Third Report of the National Cholesterol Education Program (NCEP) Expert Panel on Detection, Evaluation, and Treatment of High Blood Cholesterol in Adults (Adult Treatment Panel III) final report. *Circulation*. 2002;106:3143-421.
19. IPAQ Research Committee. Guidelines for data processing and analysis of the International Physical Activity Questionnaire (IPAQ)—short and long forms. 2005.
20. Yu M, Xu C-X, Zhu H-H, Hu R-Y, Zhang J, Wang H, et al. Associations of cigarette smoking and alcohol consumption with metabolic syndrome in a male Chinese population: a cross-sectional study. *Journal of Epidemiology*. 2014;24:361-9.
21. Berlin I, Lin S, Lima JA, Bertoni AG. Smoking status and metabolic syndrome in the multi-ethnic study of atherosclerosis. A cross-sectional study. *Tobacco Induced Diseases*. 2012;10:9-16.
22. Bišanović S, Mehić B, Sivić S. Status of lipids and the frequency diseases of cardiovascular origin in smokers according to the length period of smoking and a number of cigarettes smoked daily. *Bosnian Journal of Basic Medical Sciences*. 2011;11:46-51.
23. Slagter SN, van Vliet-Ostapchouk JV, Vonk JM, Boezen HM, Dullaart RP, Koblod ACM, et al. Associations between smoking, components of metabolic syndrome and lipoprotein particle size. *BMC Medicine*. 2013;11:195-209.
24. Chen C-C, Li T-C, Chang P-C, Liu C-S, Lin W-Y, Wu M-T, et al. Association among cigarette smoking, metabolic syndrome, and its individual components: the metabolic syndrome study in Taiwan. *Metabolism*. 2008;57:544-8.
25. Campbell SC, Moffatt RJ, Stamford BA. Smoking and smoking cessation—the relationship between cardiovascular disease and lipoprotein metabolism: a review. *Atherosclerosis*. 2008;201:225-35.
26. Maeda K, Noguchi Y, Fukui T. The effects of cessation from cigarette smoking on the lipid and lipoprotein profiles: a meta-analysis. *Preventive Medicine*. 2003;37:283-90.
27. Slentz CA, Houmard JA, Johnson JL, Bateman LA, Tanner CJ, McCartney JS, et al. Inactivity, exercise training and detraining, and plasma lipoproteins. STRRIDE: a randomized, controlled study of exercise intensity and amount. *Journal of Applied Physiology*. 2007;103:432-42.
28. Ellison RC, Zhang Y, Qureshi MM, Knox S, Arnett DK, Province MA. Lifestyle determinants of high-density lipoprotein cholesterol: The national heart, lung, and blood institute family heart study. *American Heart Journal*. 2004;147:529-35.
29. Park H, Kim K. Association of alcohol consumption with lipid profile in hypertensive men. *Alcohol and Alcoholism*. 2012;47:282-7.

- 1
- 2
- 3 30. Corrao G, Rubbiati L, Bagnardi V, Zambon A, Poikolainen K. Alcohol and coronary
- 4 heart disease: a meta-analysis. *Addiction*. 2000;95:1505-23.
- 5 31. Ronksley PE, Brien SE, Turner BJ, Mukamal KJ, Ghali WA. Association of alcohol
- 6 consumption with selected cardiovascular disease outcomes: a systematic review and
- 7 meta-analysis. *BMJ*. 2011;342:d671.
- 8 32. López EP, Rice C, Weddle DO, Rahill GJ. The relationship among cardiovascular risk
- 9 factors, diet patterns, alcohol consumption, and ethnicity among women aged 50 years
- 10 and older. *Journal of the American Dietetic Association*. 2008;108:248-56.
- 11
- 12
- 13
- 14
- 15
- 16
- 17
- 18
- 19
- 20
- 21
- 22
- 23
- 24
- 25
- 26
- 27
- 28
- 29
- 30
- 31
- 32
- 33
- 34
- 35
- 36
- 37
- 38
- 39
- 40
- 41
- 42
- 43
- 44
- 45
- 46
- 47
- 48
- 49
- 50
- 51
- 52
- 53
- 54
- 55
- 56
- 57
- 58
- 59
- 60

For peer review only

**Table 1** Socio-demographic and health-related characteristics of the study population.

|                                                                  | <b>n</b>        | <b>%</b> |
|------------------------------------------------------------------|-----------------|----------|
| <b>Gender (% female)</b>                                         | 181             | 49.9     |
| <b>Age (mean <math>\pm</math> SD, years)</b>                     | 39.2 $\pm$ 15.2 |          |
| 18-29                                                            | 113             | 31.1     |
| 30-39                                                            | 106             | 29.2     |
| 40-49                                                            | 67              | 18.5     |
| 50-59                                                            | 32              | 8.8      |
| $\geq$ 60                                                        | 45              | 12.4     |
| <b>Marital Status</b>                                            |                 |          |
| Single                                                           | 128             | 35.3     |
| Married                                                          | 220             | 60.6     |
| Divorced/widowed                                                 | 15              | 4.1      |
| <b>Work Status</b>                                               |                 |          |
| Student or volunteer                                             | 31              | 8.5      |
| Employed                                                         | 190             | 52.3     |
| Does not work/housewife/retired                                  | 142             | 39.1     |
| <b>Educational Level</b>                                         |                 |          |
| Complementary or less                                            | 144             | 39.7     |
| Secondary or technical                                           | 99              | 27.3     |
| University and above                                             | 120             | 33.1     |
| <b>Cigarette Smoking</b>                                         |                 |          |
| Never smoked                                                     | 227             | 62.5     |
| Past smoker                                                      | 15              | 4.1      |
| Current smoker                                                   | 121             | 33.3     |
| <b>Number of cigarettes smoked/day</b>                           |                 |          |
| 0                                                                | 227             | 62.5     |
| 1-19                                                             | 43              | 11.8     |
| 20-39                                                            | 63              | 17.4     |
| $\geq$ 40                                                        | 30              | 8.3      |
| <b>Physical activity</b>                                         |                 |          |
| Low-intensity activity                                           | 151             | 41.6     |
| Moderate-intensity activity                                      | 121             | 33.3     |
| High-intensity activity                                          | 88              | 24.2     |
| <b>Alcohol consumption (<math>\geq</math> once/week )</b>        | 56              | 15.4     |
| <b>Total caloric intake (mean <math>\pm</math> SD, Kcal/day)</b> | 2656 $\pm$ 1249 |          |
| <b>Total Cholesterol (mean <math>\pm</math> SD, mg/dl)</b>       | 210 $\pm$ 45    |          |
| % Elevated total cholesterol                                     | 201             | 55.4     |
| <b>Triglycerides (mean <math>\pm</math> SD, mg/dl)</b>           | 138 $\pm$ 78    |          |
| % Elevated triglycerides                                         | 114             | 31.4     |
| <b>VLDL* (mean <math>\pm</math> SD, mg/dl)</b>                   | 27 $\pm$ 15     |          |
| % Elevated VLDL                                                  | 106             | 29.2     |
| <b>LDL-C* (mean <math>\pm</math> SD, mg/dl)</b>                  | 131 $\pm$ 39    |          |
| % Elevated LDL-C                                                 | 172             | 47.5     |
| <b>HDL-C* (mean <math>\pm</math> SD, mg/dl)</b>                  | 51 $\pm$ 14     |          |
| % Reduced HDL-C                                                  | 79              | 21.8     |

\*Very Low Density Lipoprotein (VLDL); Low Density Lipoprotein cholesterol (LDL-C); High Density Lipoprotein cholesterol (HDL-C)

**Table 2a** Logistic regression analysis: associations of behavioral risks with total cholesterol (TC) and triglycerides (TG)

|                         |          | TC              |                  |                      | TG              |                  |                      |
|-------------------------|----------|-----------------|------------------|----------------------|-----------------|------------------|----------------------|
|                         |          | % ≥200<br>mg/dl | Crude<br>OR (CI) | Adjusted*<br>OR (CI) | % ≥150<br>mg/dl | Crude<br>OR (CI) | Adjusted*<br>OR (CI) |
| Number of<br>Cigarettes | 0        | 52.0            | 1.00             | 1.00                 | 25.6            | 1.00             | 1.00                 |
|                         | 1-19     | 55.8            | 1.17 (0.60-2.25) | 0.77 (0.35-1.67)     | 30.2            | 1.26 (0.62-2.58) | 1.00 (0.44-2.26)     |
|                         | 20-35    | 63.5            | 1.60 (0.90-2.85) | 1.03 (0.51-2.07)     | 38.1            | 1.79 (0.99-3.23) | 1.25 (0.64-2.46)     |
|                         | ≥40      | 63.3            | 1.59 (0.73-3.50) | 1.08 (0.41-2.84)     | 63.3            | 5.03 (2.26-11.2) | 3.82 (1.50-9.71)     |
|                         | p-trend  |                 | 0.070            | 0.916                |                 | <0.001           | 0.019                |
| Physical<br>activity    | High     | 55.7            | 1.00             |                      | 25.0            | 1.00             |                      |
|                         | Moderate | 56.2            | 1.02 (0.59-1.77) | 0.85 (0.45- 1.63)    | 32.2            | 1.43 (0.77-2.64) | 1.34 (0.67-2.66)     |
|                         | Low      | 55.6            | 0.99 (0.59-1.69) | 0.97 (0.52-1.78)     | 35.1            | 1.62 (0.90-2.92) | 1.42 (0.75-2.68)     |
| Alcohol<br>intake       | No       | 54.7            | 1.00             | 1.00                 | 30.6            | 1.00             | 1.00                 |
|                         | Yes      | 58.9            | 1.19 (0.67-2.12) | 1.37 (0.67-2.77)     | 35.7            | 1.26 (0.69-2.29) | 1.05 (0.52-2.10)     |

\*Controlling for age, gender, education, marital status and caloric intake.

**Table 2b** Logistic regression analysis: associations of behavioral risks with very low-density lipoprotein (VLDL), low-density lipoprotein cholesterol (LDL-C) and high-density lipoprotein cholesterol (HDL-C).

|                         |          | VLDL          |                  |                      | LDL-C          |                  |                      | HDL-C         |                  |                      |
|-------------------------|----------|---------------|------------------|----------------------|----------------|------------------|----------------------|---------------|------------------|----------------------|
|                         |          | %≥30<br>mg/dl | Crude<br>OR (CI) | Adjusted*<br>OR (CI) | %≥130<br>mg/dl | Crude<br>OR (CI) | Adjusted*<br>OR (CI) | %<40<br>mg/dl | Crude<br>OR (CI) | Adjusted*<br>OR (CI) |
| Number of<br>Cigarettes | 0        | 24.2          | 1.00             |                      | 43.6           | 1.00             |                      | 18.1          | 1.00             |                      |
|                         | 1-19     | 27.9          | 1.21 (0.58-2.52) | 0.96 (0.41-2.20)     | 53.5           | 1.49 (0.77-2.86) | 1.09 (0.51-2.34)     | 18.6          | 1.04 (0.45-2.40) | 0.94 (0.35-2.54)     |
|                         | 20-39    | 35.5          | 1.72 (0.94-3.14) | 1.21 (0.61-2.42)     | 54.8           | 1.57 (0.89-2.76) | 1.00 (0.51-1.97)     | 28.6          | 1.81 (0.95-3.45) | 1.67 (0.77-3.63)     |
|                         | ≥40      | 56.7          | 4.09 (1.87-8.95) | 4.75 (1.10-6.72)     | 53.3           | 1.48 (0.69-3.17) | 1.78 (0.37-2.37)     | 40.0          | 3.02 (1.35-6.76) | 1.61 (0.62-4.24)     |
|                         | p-trend  |               | <0.001           | 0.039                |                | 0.083            | 0.688                |               | 0.003            | 0.745                |
| Physical<br>activity    | High     | 26.1          | 1.00             |                      | 48.9           | 1.00             |                      | 27.3          | 1.00             |                      |
|                         | Moderate | 28.9          | 1.15 (0.62-2.13) | 1.00 (0.50-1.99)     | 49.6           | 1.02 (0.59-1.78) | 0.87 (0.46-1.64)     | 19.0          | 0.62 (0.32-1.20) | 0.78 (0.36-1.68)     |
|                         | Low      | 32.0          | 1.33 (0.74-2.39) | 1.11 (0.59-2.09)     | 46.0           | 0.89 (0.53-1.51) | 0.85 (0.47-1.53)     | 21.2          | 0.72 (0.40-1.32) | 0.62 (0.31-1.25)     |
| Alcohol<br>Intake       | No       | 28.7          | 1.00             |                      | 46.6           | 1.00             |                      | 21.2          | 1.00             |                      |
|                         | Yes      | 32.7          | 1.21 (0.65-2.24) | 0.93 (0.46-1.90)     | 52.7           | 1.28 (0.72-2.27) | 1.36 (0.68-2.73)     | 25.0          | 1.24 (0.64-2.41) | 0.75 (0.35-1.61)     |

\*Controlling for age, gender, education, marital status and caloric intake.

# BMJ Open

## Prevalence and associations of behavioral risk factors with blood lipids profile in Lebanese adults: findings from the WHO STEPwise NCD Survey

|                                 |                                                                                                                                                                                                                                                                                                                                                                                                                                                                                                  |
|---------------------------------|--------------------------------------------------------------------------------------------------------------------------------------------------------------------------------------------------------------------------------------------------------------------------------------------------------------------------------------------------------------------------------------------------------------------------------------------------------------------------------------------------|
| Journal:                        | <i>BMJ Open</i>                                                                                                                                                                                                                                                                                                                                                                                                                                                                                  |
| Manuscript ID                   | bmjopen-2018-026148.R1                                                                                                                                                                                                                                                                                                                                                                                                                                                                           |
| Article Type:                   | Research                                                                                                                                                                                                                                                                                                                                                                                                                                                                                         |
| Date Submitted by the Author:   | 07-Mar-2019                                                                                                                                                                                                                                                                                                                                                                                                                                                                                      |
| Complete List of Authors:       | Mansour, Megali; American University of Beirut Faculty of Health Sciences, EPHD<br>Tamim, Hani; American University of Beirut, Biostatistics Unit, Clinical Research Institute<br>Nasreddine, Lara; American University of Beirut<br>EL Khoury, Christelle; Tufts University School of Medicine<br>Hwalla, Nahla; American University of Beirut<br>Chaaya, Monique; American University of Beirut<br>Farhat, Antoine ; Notre Dame University<br>Sibai, Abla; American University of Beirut, EPHD |
| <b>Primary Subject Heading</b>: | Public health                                                                                                                                                                                                                                                                                                                                                                                                                                                                                    |
| Secondary Subject Heading:      | Epidemiology, Nutrition and metabolism, Smoking and tobacco, Public health                                                                                                                                                                                                                                                                                                                                                                                                                       |
| Keywords:                       | PUBLIC HEALTH, EPIDEMIOLOGY, Cigarette Smoking, Blood lipids                                                                                                                                                                                                                                                                                                                                                                                                                                     |
|                                 |                                                                                                                                                                                                                                                                                                                                                                                                                                                                                                  |

SCHOLARONE™  
Manuscripts

1  
2  
3 **Prevalence and associations of behavioral risk factors with blood lipids profile in**  
4  
5 **Lebanese adults: findings from the WHO STEPwise NCD Survey**  
6  
7

8  
9 Magali Mansour<sup>1†</sup>, Hani Tamim<sup>2†</sup>, Lara Nasreddine<sup>3</sup>, Christelle El Khoury<sup>4</sup>, Nahla Hwalla<sup>3</sup>,  
10 Monique Chaaya<sup>1</sup>, Antoine Farhat<sup>5</sup>, Abla M. Sibai<sup>1\*</sup>  
11  
12

13  
14 **Author affiliations**

15  
16 <sup>1</sup> Department of Epidemiology and Population Health, Faculty of Health Sciences, American  
17 University of Beirut, P.O.Box 11-0236, Riad El-Solh, Beirut 1107 2020, Lebanon

18  
19 <sup>2</sup> Department of Internal Medicine , American University of Beirut-Medical Center, P.O.Box  
20 11-0236, Riad El-Solh, Beirut 1107 2020, Lebanon

21  
22 † Equal Contribution

23  
24 <sup>3</sup> Faculty of Agricultural and Food Sciences, American University of Beirut, P.O.Box 11-  
25 0236, Riad El-Solh, Beirut 1107 2020, Lebanon

26  
27 <sup>4</sup> School of Medicine Department of Public Health, Tufts University, 136 Harrison Avenue,  
28 Boston, MA 02111, US

29  
30 <sup>5</sup> Faculty of Nursing and Health Sciences, Notre Dame University, Lebanon  
31  
32  
33  
34

35 **\*Corresponding author:**

36 **Abla M. Sibai**  
37  
38

39  
40 Epidemiology and Population Health  
41 Faculty of Health Sciences  
42 American University of Beirut  
43 PO Box 11-0236  
44 Beirut-Lebanon  
45 Tel: +961-1-350000 ext. 4647  
46 Fax: +961-1-744470  
47 Email: am00@aub.edu.lb  
48  
49  
50  
51  
52  
53  
54  
55  
56  
57  
58  
59  
60

1  
2  
3 **Keywords:** Cardiovascular disease, smoking, alcohol consumption, physical inactivity,  
4 dietary intake, blood lipids, Lebanon  
5  
6  
7  
8  
9

10 **Word count (excluding title page, references, tables and figures):** 3047  
11  
12  
13  
14  
15  
16  
17  
18  
19  
20  
21  
22  
23  
24  
25  
26  
27  
28  
29  
30  
31  
32  
33  
34  
35  
36  
37  
38  
39  
40  
41  
42  
43  
44  
45  
46  
47  
48  
49  
50  
51  
52  
53  
54  
55  
56  
57  
58  
59  
60

For peer review only

## Abstract

**Objective:** To examine associations of behavioral risk factors, namely cigarette smoking, physical activity, dietary intakes and alcohol consumption, with blood lipids profile.

**Design and participants:** Data drawn from a cross-sectional study involving participants aged 18 years and over (n = 363) from the nationwide WHO Stepwise Nutrition and Non-communicable Disease Risk Factor survey in Lebanon.

**Measures:** Demographic characteristics, behaviors and medical history were obtained from participants by questionnaire. Dietary assessment was performed using a 61-item culture-specific food frequency questionnaire that measured food intake over the past year. Lipid levels were measured by analysis of fasting blood samples (serum total cholesterol (TC), triglycerides (TG), very low-density lipoprotein (VLDL), low-density lipoprotein cholesterol (LDL-C) and high-density lipoprotein cholesterol (HDL-C).

**Results:** Current cigarette smoking, alcohol consumption and low physical activity were prevalent among 33.3%, 39.7%, and 41.6% of the sample, respectively. The contributions of fat and saturated fat to daily energy intake were high, estimated at 36.5% and 11.4%, respectively. Abnormal levels of TC, TG, VLDL, LDL-C, and HDL-C were observed for 55.4%, 31.4%, 29.2%, 47.5% and 21.8% of participants, respectively. Adjusting for potential confounders, cigarette smoking was positively associated with higher odds of TG and VLDL (OR=4.27; 95% CI 1.69-10.77; and 3.26; 95% CI 1.33-8.03) with a significant dose-response relationship (p-value for trend=0.010 and 0.030, respectively). Alcohol drinking and high saturated fat intake ( $\geq 10\%$  energy intake) were associated with higher odds of LDL-C (OR=1.68; 95% CI: 1.01-2.82 and OR= 1.73; 95% CI: 1.02-2.93). Physical activity did not associate significantly with any blood lipid parameter.

**Conclusion:** The demonstrated positive association between smoking, alcohol drinking and high saturated fat intake with adverse lipoprotein levels lays further evidence for clinical

1  
2  
3 practitioners, public health professionals and dietitians in the development of preventive  
4  
5 strategies among subjects with high risk of CVDs in Lebanon.  
6  
7  
8  
9  
10  
11  
12  
13  
14  
15  
16  
17  
18  
19  
20  
21  
22  
23  
24  
25  
26  
27  
28  
29  
30  
31  
32  
33  
34  
35  
36  
37  
38  
39  
40  
41  
42  
43  
44  
45  
46  
47  
48  
49  
50  
51  
52  
53  
54  
55  
56  
57  
58  
59  
60

For peer review only

### Strengths and limitations

- A nationwide survey administered in Lebanon, following the WHO STEPwise approach to surveillance guidelines, thus allowing for comparison with international literature.
- Low response rate (27.3%) for those who consented and gave fasting blood samples. Yet, differences between responders and non-responders were not significant on a number of socio-demographic characteristics.
- Whilst data on smoking, physical activity and dietary intakes were sufficiently detailed, measures of exposure to alcohol consumption lacked information on intensity and type, and may be prone to misclassification bias.
- Attention to associations between behavioral factors and dietary intakes with intermediary metabolic conditions along the causal pathway for CVD informs work towards development of tailored preventive strategies for high risk individuals.

## Introduction

The prevalence of cardiovascular diseases (CVD) is growing worldwide, and has reached epidemic levels, affecting both developed and developing countries.<sup>1</sup> The Middle East and North Africa countries represent a region which is now facing a fast rate of development and urbanization, with rates of chronic diseases increasing at an alarming rate and exceeding at times those of developed countries.<sup>2</sup> In Lebanon, a small middle-income country at the Eastern Mediterranean shore, data from the World Health Organization (WHO) indicate that the proportional mortality from CVD alone is 45%, making it the highest among all non-communicable diseases (NCDs).<sup>3</sup> With a population estimate of around 4.2 million and a Gross Domestic Product (GDP) of close to 8,520 US Dollars per capita, Lebanon is characterized by a high urbanization rate (87%), a growing trend towards survival in later life, coupled with westernization and modernization in diet and lifestyle and higher uptake of NCD risk factors.<sup>4</sup>

The primary goal in the prevention and management of CVD is to identify and modify the underlying risk behaviors that are amenable to intervention, namely, cigarette smoking, physical inactivity, dietary intakes and alcohol consumption. Associations between these factors and CVD risk through their effect on blood lipid levels have been widely examined in the western literature. Studies have shown that smokers are 2-4 times more at risk of developing heart disease than nonsmokers<sup>5</sup> and the number of cigarettes smoked/day independently predicts higher levels of Total Cholesterol (TC), Low Density Lipoprotein-Cholesterol (LDL-C), and Triglycerides (TG).<sup>6</sup> Also, smoking cessation has been shown to improve High Density Lipoprotein-Cholesterol (HDL-C) levels.<sup>7</sup> Cigarette smoking is described as a strong inflammation mediator and a key promoter in the atherosclerotic process. Similarly, the anti-inflammatory effect of frequent physical activity has been noted to be the reason behind reduced heart disease risk among physically active individuals.<sup>8</sup>

1  
2  
3 Regular physical activity with weight reduction has a large beneficial impact on the  
4 lipoproteins profile of adult men and women,<sup>9</sup> by increasing plasma volume, decreasing  
5 blood thickness, and thus reducing LDL-C concentrations.<sup>10</sup> Also, systematic reviews and  
6 meta-analysis of intervention studies have shown that heavy alcohol drinking results in an  
7 elevation in triglyceride levels, while moderate consumption increases circulating levels of  
8 HDL-C.<sup>11</sup> Similarly, diet is recognized as a modifiable risk factor that can make a  
9 substantial contribution to the risk of CVD.<sup>12 13</sup> Energy intake, the types of fatty acids  
10 consumed and the level of sugar ingestion may impact the lipid and cardiometabolic  
11 profile.<sup>14</sup> The 2017 Presidential Advisory from the American Heart Association indicated that  
12 replacement of saturated fat with unsaturated fatty acids decreases LDL-C levels and CVD  
13 risk, while replacing it with refined carbohydrates and sugar, yields no significant benefits to  
14 cardiovascular health.<sup>14</sup>

15  
16  
17  
18  
19  
20  
21  
22  
23  
24  
25  
26  
27  
28  
29  
30  
31  
32  
33  
34  
35  
36  
37  
38  
39  
40  
41  
42  
43  
44  
45  
46  
47  
48  
49  
50  
51  
52  
53  
54  
55  
56  
57  
58  
59  
60  
Much of the above evidence comes from studies conducted in North American and  
European countries and to a lesser extent from the Far East, mostly among Japanese and  
Korean population. Arab populations including the Lebanese have quite different risk  
behaviors, varied dietary habits and risk profile,<sup>15</sup> and studies evaluating the association  
between behaviors and intermediary variables along the causal pathway of CVD  
including lipid levels remain scarce in the region. Compared with other neighboring  
countries, Lebanon was shown to have one of the highest prevalence estimates of  
metabolic syndrome,<sup>16</sup> and has been witnessing high rates of smoking, among both  
adult men and women aged 18 years and over (42.9% and 27.5%, respectively).<sup>17</sup> Using  
data from a nationwide population-based survey of Lebanese adults, this study aims to  
examine the relation between behavioral risk factors including cigarette smoking,  
physical activity, dietary intakes and alcohol consumption with serum lipids and  
lipoproteins, while taking into account several potential confounding factors. Findings

1  
2  
3 from this study inform prevention strategies among subjects with high risk of CVD in  
4  
5 the country.  
6  
7  
8  
9

## 10 **Methods**

### 11 **Study design and participants**

12  
13  
14  
15  
16 The data presented in this study are derived from the WHO Nutrition and Non-  
17  
18 Communicable Diseases Risk Factor (NNCD-RF) cross-sectional household survey  
19  
20 conducted in Lebanon in 2009.<sup>18</sup> Using multi-stage stratified cluster study design, the  
21  
22 sampling was based on the age-sex distribution of the Lebanese population as provided by the  
23  
24 Central Administration for Statistics. One adult was randomly selected from each household  
25  
26 using Kish methodology.<sup>19</sup> Pregnant and lactating women and individuals with mental  
27  
28 disabilities were excluded. With a non-response rate of 10% at the individual level, this  
29  
30 yielded a sample of 2668 survey participants aged 18 years and above. Those free from  
31  
32 known history of hyperlipidemia and diabetes in the first phase of the study (n = 1,331) were  
33  
34 approached to undergo a biochemical assessment, of which 363 provided written consent and  
35  
36 gave fasting blood samples. Further details on the design and sample of the survey are  
37  
38 published elsewhere.<sup>4</sup> The study protocol was approved by the Institutional Review Board of  
39  
40 the American University of Beirut (AUB), and informed consent was taken from all  
41  
42  
43  
44  
45  
46  
47  
48  
49 participants.

### 50 **Data collection**

51  
52 The data collection procedure followed the WHO STEPwise approach to Surveillance,<sup>20</sup> and  
53  
54 included the following three steps: Step 1 Questionnaire, whereby information about socio-  
55  
56 demographic characteristics, NCDs and NCD risk factors, including dietary intake, were  
57  
58 collected through face-to-face interviews; Step 2 in which anthropometric and blood pressure  
59  
60

1  
2  
3 measurements were taken using standardized techniques and calibrated equipment; and  
4  
5 finally, Step 3 in which biochemical analysis for assessment of the blood lipid profile was  
6  
7 performed on blood samples collected after an overnight fast of at least 8 hours. Serum was  
8  
9 centrifuged on site and shipped on dry ice to the AUB Laboratory.  
10  
11  
12  
13

### 14 **Measures of blood lipids**

15  
16 Levels of blood lipids including TC, TG, very low density lipoprotein (VLDL), LDL-C and  
17  
18 HDL-C were analyzed using the Vitros 350 analyzer, an enzymatic spectrophotometric  
19  
20 technique. The inter-assay variation of measurements did not exceed 4%. Quality control was  
21  
22 performed within each run using standard performance verifier solutions provided by Ortho-  
23  
24 Clinical Diagnostics. Analyses were conducted in duplicates, and the average value was  
25  
26 utilized in the analysis. Based on the Adult Treatment Panel III guidelines,<sup>21</sup> the cutoff points  
27  
28 used for the definition of risk levels of TC, TG, VLDL, LDL-C and HDL-C were  $\geq 200$ ,  
29  
30  $\geq 150$ ,  $\geq 30$ ,  $\geq 130$  and  $\leq 40$  mg/dl, respectively.  
31  
32  
33  
34  
35  
36  
37

### 38 **Behavioral risk factors and other measures**

39  
40 Behavioral risk factors examined in this study included cigarette smoking, physical activity,  
41  
42 and alcohol consumption. Cigarette smoking status (never, past and current) and intensity  
43  
44 (number of cigarettes smoked/day) were assessed. Intensity was later categorized into three  
45  
46 levels according to number of cigarettes/day (1 to 19, 20 to 39 and  $\geq 40$ ). The short version of  
47  
48 the International Physical Activity Questionnaire was used to assess physical activity among  
49  
50 participants.<sup>22</sup> Three categories of physical activity (low, moderate, and high) were assigned  
51  
52 based on METs-min/week (MET-min being the product of the resting metabolic rate for an  
53  
54 activity and the number of minutes taken to perform it). Alcohol-related behavior was  
55  
56 assessed as a dichotomous variable (ever vs never). Dietary assessment was performed using  
57  
58  
59  
60

1  
2  
3 a 61-item culture-specific food frequency questionnaire that measured food intake over the  
4  
5 past year.<sup>4, 15</sup> Intakes of energy and macronutrients were estimated using the food  
6  
7 composition database of the Nutritionist IV software, and the food composition table for local  
8  
9 and traditional Middle-Eastern foods.<sup>23,24</sup> Intakes of carbohydrates, fat and protein were  
10  
11 compared to cut-offs within the Acceptable Macronutrient Distribution Range,<sup>25</sup> and intakes  
12  
13 of saturated fat and sugar were compared to the recommendations of the WHO.<sup>26, 27</sup>  
14  
15  
16

17  
18  
19 Covariates of interest included total daily caloric intake and body mass index (BMI),  
20  
21 measured as the ratio of weight (kilograms) to the square of height (meters). In addition,  
22  
23 gender, age (18-29, 30-39, 40-49, 50-59, and  $\geq 60$ ), marital status (single, married,  
24  
25 divorced/widowed), education level (complementary or less, secondary/technical, university  
26  
27 and above), and occupational status (student/volunteer, working, does not  
28  
29 work/housewife/retired) were considered as potential covariates.  
30  
31  
32

### 33 34 35 **Patient and Public Involvement**

36  
37 This study is based on secondary data analyses. The original data collection tool was adapted  
38  
39 from the WHO STEPwise approach to NCD risk factor surveillance,<sup>20</sup> that did not directly  
40  
41 involve patients or the public in outcome development or conduct of the study. However, we  
42  
43 have been engaging with stakeholders to disseminate the findings on NCD risk factors,  
44  
45 including tobacco consumption and dietary intakes, and on associations with various health-  
46  
47 related outcomes to the public at large.  
48  
49  
50

### 51 52 53 **Statistical analysis**

54  
55 Means, standard deviations (SD) and frequencies were used to describe the various socio-  
56  
57 demographic, behavioral, nutritional and clinical characteristics of the participants. The  
58  
59  
60

1  
2  
3 associations between each of the risk factors and levels of the different blood lipids were  
4  
5 examined using multiple logistic regression analysis. Unadjusted and adjusted odds ratios  
6  
7 (ORs) and their 95% confidence intervals (CIs) controlling for age, gender, education, marital  
8  
9 status, caloric intake and BMI were estimated. Test for trend with increasing number of daily  
10  
11 amount of cigarettes smoked was also conducted, and a two-sided p-value < 0.05 was  
12  
13 considered significant. The Statistical Package for the Social Sciences 22.0.1 (SPSS Inc.,  
14  
15 Chicago, IL, USA) was used for all computations.  
16  
17  
18  
19  
20  
21  
22  
23

## 24 **Results**

25  
26 The socio-demographic and health-related characteristics of the study sample are summarized  
27  
28 in Table 1. The sample was equally divided by gender (49.9% females and 50.1% males),  
29  
30 with a mean age of  $39.2 \pm 15.2$  years (range 18 to 92 years). The majority were married  
31  
32 (60.6%), and close to half of the participants were employed (52.3%) at the time of the study,  
33  
34 with a high percentage having less than complementary education (39.7%). Ever smokers  
35  
36 constituted 37.5% of the sample, 41.6% were classified as being engaged in low-intensity  
37  
38 physical activity, and 39.7% reported ever alcohol drinkers. Average daily energy intake was  
39  
40 estimated at  $2656 \pm 1249$  Kcal/day, with 36.5% of caloric intake from fat, 11.4% from  
41  
42 saturated fat, 49.1% from carbohydrates, 5.7% from sugar, and 15.2% from protein.  
43  
44 Abnormal levels of TC, TG, VLDL, LDL-C, and HDL-C were observed for 55.4%, 31.4%,  
45  
46 29.2%, 47.5% and 21.8% of the participants, respectively.  
47  
48  
49  
50  
51  
52  
53  
54  
55  
56  
57  
58  
59  
60

Insert table 1 around here

1  
2  
3 Tables 2a and 2b show the unadjusted and adjusted ORs for the association between  
4 behavioral risk factors and dietary variables with blood lipids levels. Associations with  
5 cigarette smoking were positive for most outcomes but significant for those consuming more  
6 than 40 cigarettes/day, compared to non-smokers, in the case of TG (unadjusted OR = 5.03)  
7 and VLDL (OR = 4.09) and HDL-C OR = 3.02). Adjusting for potential confounders, the  
8 associations maintained statistical significance for TG and VLDL, with an adjusted OR of  
9 4.27 (95% CI 1.69- 10.77) and 3.26 (95% CI 1.33-8.03), respectively. Results showed a dose-  
10 response relationship with increasing number of cigarettes consumed for (p-value for trend =  
11 0.010 and 0.030, respectively). In addition, a statistically significant association was observed  
12 between ever alcohol drinking and LDL-C (OR=1.53). This association retained statistical  
13 significance even after adjustment for potential confounders with an OR of 1.68 (95% CI  
14 1.01-2.82). Out of all the dietary variables examined, only saturated fat was associated with  
15 blood lipids, namely TC and LDL-C, with an adjusted OR of 1.73 for both lipid abnormalities  
16 (95% CI 1.02-2.94 and 1.02-2.93, respectively). Physical activity was not associated with any  
17 of the blood lipid parameters.  
18  
19  
20  
21  
22  
23  
24  
25  
26  
27  
28  
29  
30  
31  
32  
33  
34  
35  
36  
37  
38  
39  
40  
41  
42  
43  
44  
45  
46  
47  
48  
49

Insert tables 2a and 2b around here

## 50 Discussion

51 Our results showed that heavy cigarette smoking is associated with increased levels of TG  
52 and VLDL, with findings showing significant dose-response relationships with increasing  
53 number of cigarettes smoked per day. The study also showed that alcohol drinking and high  
54 saturated fat intake are significantly associated with higher levels of LDL-C. However, there  
55 were no consistent associations between physical activity and fasting blood lipids profile. To  
56  
57  
58  
59  
60

1  
2  
3 our knowledge, this is the first study in Lebanon to explore these associations, based on  
4 objectively measured lipid parameters and using standardized laboratory techniques and  
5  
6  
7  
8 tools, while taking into consideration the effect of potential confounders.  
9

10  
11 There are strong indicators in the literature that the deleterious effect of cigarette smoking on  
12 heart disease and atherosclerosis is partially explained by the effect of smoking on the  
13 concentration of blood lipids and lipoproteins. Our study confirms the results of earlier cross-  
14 sectional studies showing that the association between smoking and lipoproteins are observed  
15 in the levels of TG, VLDL and HDL-C,<sup>6, 28, 29</sup> with the impact on lipid levels increasing with  
16 increase in the number of cigarettes smoked/day in a dose dependent relationship.<sup>30, 31</sup> Our  
17 observation of the largest effect of cigarette smoking on lipid parameters being seen in those  
18 who smoked more than two packs a day is also consistent with Chen et al. study comprising  
19 of 1,164 men in Taiwan.<sup>32</sup> One popular mechanism by which smoking affects lipoproteins is  
20 that cigarette particulate matter alters catecholamine release—and thus free fatty acid release,  
21 which in turn contributes to the accumulation of the LDL-C concentrations and to lower  
22 levels of HDL-C in the blood.<sup>33</sup> The association between cigarette smoking and the increase  
23 in TG can also be explained by the decrease in the activity of the lipoprotein lipase among  
24 smokers thus disrupting lipid and lipoprotein metabolism. Furthermore, smoking cessation  
25 was found to improve lipid and lipoprotein levels in observational studies and randomized  
26 clinical trials.<sup>7, 34</sup> Taken together, the totality of evidence from these studies and our data-  
27 including consistency upon replication across various studies, the dose-response relationship,  
28 the magnitude and significance of association, biological plausibility as well as effects of  
29 smoking cessation on lipoprotein levels, supports a strong relationship between smoking and  
30 lipid profiles.  
31  
32  
33  
34  
35  
36  
37  
38  
39  
40  
41  
42  
43  
44  
45  
46  
47  
48  
49  
50  
51  
52  
53  
54  
55  
56  
57  
58  
59  
60

1  
2  
3 Our study showed that alcohol drinking was associated with higher LDL-C levels in  
4  
5 Lebanese adults, but was not associated with other lipid parameters. Available evidence on  
6  
7 the impact of alcohol on LDL-C is conflicting with recent studies suggesting that the  
8  
9 association of alcohol and LDL-C levels may be population-specific.<sup>35</sup> For instance, studies  
10  
11 conducted amongst Danish adults reported an inverse association between alcohol intake and  
12  
13 LDL-C,<sup>36</sup> while studies conducted in Spanish and Italian populations found that higher  
14  
15 alcohol consumption was associated with increased LDL-C.<sup>37,38</sup> According to a review by  
16  
17 Brinton (2012), these inconsistent findings on the association between alcohol intake and  
18  
19 LDL-C, may be explained by allele-specific genetic effects, such as the Apo E4 and Apo A5  
20  
21 genes.<sup>39</sup> In our study, alcohol drinking was not associated with HDL-C levels. Findings on  
22  
23 the relationship between alcohol and HDL-C have in fact been less consistent in the  
24  
25 literature, with some but not all showing an effect on higher HDL-C levels.<sup>40,41</sup> Indeed, the  
26  
27 effect of alcohol on CVD including coronary artery disease, stroke and myocardial infarction  
28  
29 appears to be biphasic showing a J or U-shaped relationship based on the amount of alcohol  
30  
31 consumed,<sup>41,42</sup> with lower CVD mortality risks by light to moderate alcohol consumption  
32  
33 and increased risk by heavy alcohol intake.<sup>43</sup> The discrepancy between our results with those  
34  
35 in the literature may be due to differences in race/ethnicity and genetic variations,<sup>44</sup> or  
36  
37 alternatively, owing to measurement error in our assessment of alcohol consumption, based  
38  
39 on self-reports of a dichotomous variable. Lipid profiles are influenced by the type of alcohol  
40  
41 consumed and by drinking frequency and patterns.

42  
43 Dietary intakes are amongst the modifiable risk factors that may modulate plasma lipids and  
44  
45 the risk of CVD. In our study, saturated fat was the only dietary factor that was significantly  
46  
47 associated with lipid parameters, and specifically with TC and LDL-C. Despite the  
48  
49 increasing controversy around the relationship between saturated fat and blood cholesterol  
50  
51 levels, an increasing body of evidence highlights the strong atherogenicity of saturated fatty  
52  
53  
54  
55  
56  
57  
58  
59  
60

1  
2  
3 acids through their impact on LDL-C. <sup>14</sup> A systematic review and meta-regression analysis  
4 published in 2016 showed that a decrease in saturated fats of 1% of daily energy intake  
5 coupled with an increase of 1% in polyunsaturated fat, lowered LDL cholesterol by 2.1  
6 mg/dL.<sup>45</sup> In 2017, a Presidential Advisory from the American Heart Association (AHA)  
7 concluded that available evidence strengthens the long-standing AHA recommendations to  
8 decrease saturated fat intake and replace it with unsaturated fats. The AHA Advisory  
9 highlighted that the shift from saturated to unsaturated fats should occur in the context of an  
10 overall healthful dietary pattern such as the DASH or Mediterranean patterns. <sup>14</sup>  
11  
12  
13  
14  
15  
16  
17  
18  
19  
20  
21  
22

23 In our study, physical activity did not appear to be associated with lipid parameters. The  
24 literature suggests that physical activity increases the level of HDL-C and has beneficial  
25 effects on lipoprotein particle size and number. <sup>46</sup> Also, moderate intensity exercise is known  
26 to have a more favorable effect on blood lipids since it allows the use of lipids as a fuel  
27 source which implies an increase in the uptake and oxidation of the lipids in the skeletal  
28 muscle. <sup>46</sup>  
29  
30  
31  
32  
33  
34  
35  
36  
37

38 Some other limitations should be taken into consideration when interpreting the results of our  
39 study. Because the study used a cross-sectional design, findings only imply associations and  
40 causal relationships cannot be established. The proportion of participants who gave fasting  
41 blood samples (of at least 8 hours) was relatively small (27.3%); however, responders were  
42 comparable to non-responders on a number of socio-demographic characteristics except for  
43 marital status (61% of responders vs. 50% of non-responders were married). Also, we had  
44 earlier documented comparable dietary data between respondents and non-respondents based  
45 on factor loading matrices on patterns of food groups intake. <sup>4</sup> As mentioned earlier,  
46 measures of exposure were self-reported which can introduce some misclassification error.  
47  
48  
49  
50  
51  
52  
53  
54  
55  
56  
57  
58  
59  
60 Whilst this may have been problematic in the case of alcohol consumption that lacked

1  
2  
3 detailed data on type of alcohol consumed, measurement of cigarette smoking and physical  
4 activity were more detailed and reliable. Information on cigarette smoking in our study  
5 included the amount of cigarettes smoked and the standardized IPAQ was used to assess  
6 physical activity.  
7  
8  
9  
10  
11  
12

13 To conclude, our results suggest that smoking, alcohol drinking and high saturated fat are  
14 associated with adverse levels of lipoprotein, among Lebanese men and women. The role of  
15 lipoproteins in atherogenesis has been clearly defined, and controlling for blood lipid levels  
16 decreases the risk of heart and many other chronic diseases. Our findings lay further evidence  
17 for clinical practitioners, public health professionals and dieticians regarding the potential  
18 benefits of lifestyle and dietary modifications in their pursuit to curb the burden of  
19 hyperlipidemia and CVD at the individual and population level. The overall high rate of  
20 smoking behavior in Lebanon among both men and women, coupled with the shift in dietary  
21 patterns towards high fat energy dense foods,<sup>4, 15</sup> are likely to adversely impact on the  
22 healthcare bill in the country. Further studies with larger sample size that examine the  
23 association of combination patterns of poor lifestyle factors on lipid profile among Lebanese  
24 adults are warranted.  
25  
26  
27  
28  
29  
30  
31  
32  
33  
34  
35  
36  
37  
38  
39  
40  
41  
42  
43  
44  
45  
46  
47  
48  
49  
50  
51  
52  
53  
54  
55  
56  
57  
58  
59  
60

**Contributors**

MM conducted initial analyses and wrote first draft of the paper, in partial fulfillment of her MSc in Epidemiology. HT supervised the conduct of analyses and contributed to the write-up of the paper. LN conducted the dietary analyses and contributed to the write-up of the paper. CK, NH, MC and AF provided statistical advice and contributed to the paper revision. AMS coordinated original study conduct, conceived and finalized the analyses, and wrote the manuscript. All authors read and approved the final version of the manuscript.

**Funding statement**

The original study conduct was funded by the World Health Organization (WHO) - Lebanon. However, no funds were available for this secondary analysis.

**Data sharing statement**

The dataset was available for all authors of the study and will be available for other non-commercial researchers upon request.

**Declaration of conflicting interests**

The authors declare that there is no conflict of interest.

## REFERENCES

1. Roth GA, Johnson C, Abajobir A, Abd-Allah F, Abera SF, Abyu G et al. Global, Regional, and National Burden of Cardiovascular Diseases for 10 Causes, 1990 to 2015. *Journal of the American College of Cardiology*. 2017;70:1-25.
2. Sibai AM, Nasreddine L, Mokdad AH, Adra N, Tabet M, Hwalla N. Nutrition transition and cardiovascular disease risk factors in Middle East and North Africa countries: reviewing the evidence. *Annals of Nutrition and Metabolism*. 2010;57:193-203.
3. World Health Organization. Non-communicable Diseases Country Profiles 2014.
4. Naja F, Nasreddine L, Itani L, Adra N, Sibai A, Hwalla N. Association between dietary patterns and the risk of metabolic syndrome among Lebanese adults. *European Journal of Nutrition*. 2013;52:97-105.
5. US Department of Health and Human Services. The health consequences of smoking—50 years of progress: a report of the Surgeon General. Atlanta (GA): The health consequences of smoking—50 years of progress: a report of the Surgeon General: Centers for Disease Control and Prevention (US), National Center for Chronic Disease Prevention and Health Promotion, Office on Smoking and Health; 2014.
6. Gossett LK, Johnson HM, Piper ME, Fiore MC, Baker TB, Stein JH. Smoking intensity and lipoprotein abnormalities in active smokers. *Journal of Clinical Lipidology*. 2009;3:372-8.
7. Gepner AD, Piper ME, Johnson HM, Fiore MC, Baker TB, Stein JH. Effects of smoking and smoking cessation on lipids and lipoproteins: outcomes from a randomized clinical trial. *American Heart Journal*. 2011;161:145-51.
8. Abramson JL, Vaccarino V. Relationship between physical activity and inflammation among apparently healthy middle-aged and older US adults. *Archives of Internal Medicine*. 2002;162:1286-92.
9. Barengo NC, Kastarinen M, Lakka T, Nissinen A, Tuomilehto J. Different forms of physical activity and cardiovascular risk factors among 24–64-year-old men and women in Finland. *European Journal of Cardiovascular Prevention & Rehabilitation*. 2006;13:51-9.
10. Thompson PD, Crouse SF, Goodpaster B, Kelley D, Moyna N, Pescatello L. The acute versus the chronic response to exercise. *Medicine and Science in Sports and Exercise*. 2001;33:S438-45.
11. Brien SE, Ronksley PE, Turner BJ, Mukamal KJ, Ghali WA. Effect of alcohol consumption on biological markers associated with risk of coronary heart disease: systematic review and meta-analysis of interventional studies. *BMJ*. 2011;342:d636.
12. Wang Q, Afshin A, Yakoob MY, Singh GM, Rehm CD, Khatibzadeh S, on behalf of the Global Burden of Diseases. Nutrition and Chronic Diseases Expert Group (NutriCoDE). Impact of Nonoptimal Intakes of Saturated, Polyunsaturated, and Trans Fat on Global Burdens of Coronary Heart Disease. *J Am Heart Assoc*. 2016;5:e002891

13. Stone NJ, Robinson JG, Lichtenstein AH, Noel Bairey Merz C, Blum CB, Eckel RH, et al. 2013 ACC/AHA guideline on the treatment of blood cholesterol to reduce atherosclerotic cardiovascular risk in adults: a report of the American College of Cardiology/American Heart Association Task Force on Practice Guidelines. *Journal of the American College of Cardiology*. 2014;63:2889-934.
14. Sacks FM, Lichtenstein AH, Wu JH, Appel LJ, Creager MA, Kris-Etherton PM, et al. Dietary fats and cardiovascular disease: a presidential advisory from the American Heart Association. *Circulation*. 2017;13:e1-e23.
15. Naja F, Nasreddine L, Itani L, Chamieh MC, Adra N, Sibai AM, et al. Dietary patterns and their association with obesity and sociodemographic factors in a national sample of Lebanese adults. *Public Health Nutrition*. 2011;14:1570-8.
16. Sibai AM, Obeid O, Batal M, Adra N, El Khoury D, Hwalla N. Prevalence and correlates of metabolic syndrome in an adult Lebanese population. *CVD Prevention & Control*. 2008;3:83-90.
17. Sibai AM, Iskandarani M, Darzi A, Nakkash R, Saleh S, Fares S, et al. Cigarette smoking in a Middle Eastern country and its association with hospitalisation use: a nationwide cross-sectional study. *BMJ Open*. 2016;6:e009881.
18. Sibai AM, Hwalla N. WHO STEPS Chronic Disease Risk Factor Surveillance: Data Book for Lebanon. 2010.  
[https://www.who.int/ncds/surveillance/steps/2008\\_STEPS\\_Lebanon.pdf](https://www.who.int/ncds/surveillance/steps/2008_STEPS_Lebanon.pdf)
19. Lavrakas PJ. *Encyclopedia of survey research methods*: Sage Publications; 2008.
20. World Health Organization (WHO). *Noncommunicable diseases and their risk factors- STEPS Manual*. <http://www.who.int/ncds/surveillance/steps/manual/en/>
21. National Cholesterol Education Program Adult Treatment Panel III. Third Report of the National Cholesterol Education Program (NCEP) Expert Panel on Detection, Evaluation, and Treatment of High Blood Cholesterol in Adults (Adult Treatment Panel III) final report. *Circulation*. 2002;106:3143-421.
22. IPAQ Research Committee. *Guidelines for data processing and analysis of the International Physical Activity Questionnaire (IPAQ)—short and long forms*. 2005.
23. Nutritionist IV. *N-squared computing*: Silverton; 1998. 31.
24. Pellet P, Shadarevian S. Food composition. Tables for use in the Middle East. In: *Food composition tables for use in the Middle East*. 2nd ed. 1970.
25. Institute of Medicine. *Dietary Reference Intakes for Energy, Carbohydrate, Fiber, Fat, Fatty Acids, Cholesterol, Protein, and Amino Acids*. Washington, DC: The National Academies Press. 2005; <https://doi.org/10.17226/10490>.
26. Food and Agriculture Organization/World Health Organization. *Interim Summary of Conclusions and Dietary Recommendations on Total Fat & Fatty Acids*. 2008; [https://www.who.int/nutrition/topics/FFA\\_summary\\_rec\\_conclusion.pdf?ua=1](https://www.who.int/nutrition/topics/FFA_summary_rec_conclusion.pdf?ua=1).
27. World Health Organization. *Guideline: Sugars intake for adults and children*. 2015; [http://apps.who.int/iris/bitstream/handle/10665/149782/9789241549028\\_eng.pdf;jsessionid=2A114891D4D08F644AA154370830829B?sequence=1](http://apps.who.int/iris/bitstream/handle/10665/149782/9789241549028_eng.pdf;jsessionid=2A114891D4D08F644AA154370830829B?sequence=1).
28. Yu M, Xu C-X, Zhu H-H, Hu R-Y, Zhang J, Wang H, et al. Associations of cigarette smoking and alcohol consumption with metabolic syndrome in a male Chinese population: a cross-sectional study. *Journal of Epidemiology*. 2014;24:361-9.

- 1
  - 2
  - 3
  - 4
  - 5
  - 6
  - 7
  - 8
  - 9
  - 10
  - 11
  - 12
  - 13
  - 14
  - 15
  - 16
  - 17
  - 18
  - 19
  - 20
  - 21
  - 22
  - 23
  - 24
  - 25
  - 26
  - 27
  - 28
  - 29
  - 30
  - 31
  - 32
  - 33
  - 34
  - 35
  - 36
  - 37
  - 38
  - 39
  - 40
  - 41
  - 42
  - 43
  - 44
  - 45
  - 46
  - 47
  - 48
  - 49
  - 50
  - 51
  - 52
  - 53
  - 54
  - 55
  - 56
  - 57
  - 58
  - 59
  - 60
29. Berlin I, Lin S, Lima JA, Bertoni AG. Smoking status and metabolic syndrome in the multi-ethnic study of atherosclerosis. A cross-sectional study. *Tobacco Induced Diseases*. 2012;10:9-16.
30. Bišanović S, Mehić B, Sivić S. Status of lipids and the frequency diseases of cardiovascular origin in smokers according to the length period of smoking and number of cigarettes smoked daily. *Bosnian Journal of Basic Medical Sciences*. 2011;11:46-51.
31. Slagter SN, van Vliet-Ostaptchouk JV, Vonk JM, Boezen HM, Dullaart RP, Koblold ACM, et al. Associations between smoking, components of metabolic syndrome and lipoprotein particle size. *BMC Medicine*. 2013;11:195-209.
32. Chen C-C, Li T-C, Chang P-C, Liu C-S, Lin W-Y, Wu M-T, et al. Association among cigarette smoking, metabolic syndrome, and its individual components: the metabolic syndrome study in Taiwan. *Metabolism*. 2008;57:544-8.
33. Campbell SC, Moffatt RJ, Stamford BA. Smoking and smoking cessation—the relationship between cardiovascular disease and lipoprotein metabolism: a review. *Atherosclerosis*. 2008;201:225-35.
34. Maeda K, Noguchi Y, Fukui T. The effects of cessation from cigarette smoking on the lipid and lipoprotein profiles: a meta-analysis. *Preventive Medicine*. 2003;37:283-90.
35. Matsumoto C, Miedema MD, Ofman P, Gaziano JM, Sesso HD. An expanding knowledge of the mechanisms and effects of alcohol consumption on cardiovascular disease. *Journal of Cardiopulmonary Rehabilitation and Prevention*. 2014;34:159-71.
36. Tolstrup JS, Gronbaek M, Nordestgaard BRG. Alcohol intake, myocardial infarction, biochemical risk factors, and alcohol dehydrogenase genotypes. *Circulation: Cardiovascular Genetics*. 2009;2:507-14.
37. Corella D, Portolés O, Arriola L, Chirlaque MD, Barricarte A, Francés F, et al. Saturated fat intake and alcohol consumption modulate the association between the APOE polymorphism and risk of future coronary heart disease: a nested case-control study in the Spanish EPIC cohort. *The Journal of Nutritional Biochemistry*. 2011;22:487-94.
38. Perissinotto E, Buja A, Maggi S, Enzi G, Manzato E, Scafato E, et al. Alcohol consumption and cardiovascular risk factors in older lifelong wine drinkers: the Italian Longitudinal Study on Aging. *Nutrition, Metabolism and Cardiovascular Diseases*. 2010;20:647-55.
39. Brinton EA. Effects of ethanol intake on lipoproteins. *Current Atherosclerosis Reports*. 2012;14:108-14.
40. Ellison RC, Zhang Y, Qureshi MM, Knox S, Arnett DK, Province MA. Lifestyle determinants of high-density lipoprotein cholesterol: The national heart, lung, and blood institute family heart study. *American Heart Journal*. 2004;147:529-35.
41. Park H, Kim K. Association of alcohol consumption with lipid profile in hypertensive men. *Alcohol and Alcoholism*. 2012;47:282-7.
42. Corrao G, Rubbiati L, Bagnardi V, Zambon A, Poikolainen K. Alcohol and coronary heart disease: a meta-analysis. *Addiction*. 2000;95:1505-23.

- 1  
2  
3 43. Ronksley PE, Brien SE, Turner BJ, Mukamal KJ, Ghali WA. Association of alcohol  
4 consumption with selected cardiovascular disease outcomes: a systematic review and  
5 meta-analysis. *BMJ*. 2011;342:d671.  
6  
7 44. López EP, Rice C, Weddle DO, Rahill GJ. The relationship among cardiovascular risk  
8 factors, diet patterns, alcohol consumption, and ethnicity among women aged 50 years  
9 and older. *Journal of the American Dietetic Association*. 2008;108:248-56.  
10  
11 45. Mensink RP. Effects of Saturated Fatty Acids on Serum Lipids and Lipoproteins: A  
12 Systematic Review and Regression Analysis. Geneva, Switzerland: World Health  
13 Organization; 2016.  
14  
15 46. Slentz CA, Houmard JA, Johnson JL, Bateman LA, Tanner CJ, McCartney JS, et al.  
16 Inactivity, exercise training and detraining, and plasma lipoproteins. STRRIDE: a  
17 randomized, controlled study of exercise intensity and amount. *Journal of Applied  
18 Physiology*. 2007;103:432-42.  
19  
20  
21  
22  
23  
24  
25  
26  
27  
28  
29  
30  
31  
32  
33  
34  
35  
36  
37  
38  
39  
40  
41  
42  
43  
44  
45  
46  
47  
48  
49  
50  
51  
52  
53  
54  
55  
56  
57  
58  
59  
60

**Table 1** Distribution of socio-demographic characteristics, behavioral factors and lipid profile of the study population.

|                                                                  | <b>n</b>        | <b>%</b> |
|------------------------------------------------------------------|-----------------|----------|
| <b>Gender (% female)</b>                                         | 181             | 49.9     |
| <b>Age (mean <math>\pm</math> SD, years)</b>                     | 39.2 $\pm$ 15.2 |          |
| 18-29                                                            | 113             | 31.1     |
| 30-39                                                            | 106             | 29.2     |
| 40-49                                                            | 67              | 18.5     |
| 50-59                                                            | 32              | 8.8      |
| $\geq 60$                                                        | 45              | 12.4     |
| <b>Marital Status</b>                                            |                 |          |
| Single                                                           | 128             | 35.3     |
| Married                                                          | 220             | 60.6     |
| Divorced/widowed                                                 | 15              | 4.1      |
| <b>Work Status</b>                                               |                 |          |
| Student or volunteer                                             | 31              | 8.5      |
| Employed                                                         | 190             | 52.3     |
| Does not work/housewife/retired                                  | 142             | 39.1     |
| <b>Educational Level</b>                                         |                 |          |
| Complementary or less                                            | 144             | 39.7     |
| Secondary or technical                                           | 99              | 27.3     |
| University and above                                             | 120             | 33.1     |
| <b>Cigarette Smoking</b>                                         |                 |          |
| Never smoked                                                     | 227             | 62.5     |
| Past smoker                                                      | 15              | 4.2      |
| Current smoker                                                   | 121             | 33.3     |
| <b>Number of cigarettes smoked/day</b>                           |                 |          |
| 0                                                                | 227             | 62.5     |
| 1-19                                                             | 43              | 11.8     |
| 20-39                                                            | 63              | 17.4     |
| $\geq 40$                                                        | 30              | 8.3      |
| <b>Physical activity</b>                                         |                 |          |
| Low-intensity activity                                           | 151             | 41.6     |
| Moderate-intensity activity                                      | 121             | 33.3     |
| High-intensity activity                                          | 88              | 24.2     |
| <b>Alcohol consumption (ever drinker)</b>                        | 144             | 39.7     |
| <b>Total caloric intake (mean <math>\pm</math> SD, Kcal/day)</b> | 2656 $\pm$ 1249 |          |
| <b>Fat intake (% of total energy)<sup>a</sup></b>                | 36.5 $\pm$ 6.89 |          |
| $\geq 30$ <sup>b</sup>                                           | 275             | 81.6     |
| <b>Saturated fat intake (% of total energy)<sup>a</sup></b>      | 11.4 $\pm$ 2.92 |          |
| $\geq 10$ <sup>c</sup>                                           | 224             | 66.5     |
| <b>Carbohydrates intake (% of total energy)<sup>a</sup></b>      | 49.1 $\pm$ 7.03 |          |
| $\geq 55$ <sup>b</sup>                                           | 71              | 21.1     |
| <b>Sugar (% of total energy)<sup>a</sup></b>                     | 5.7 $\pm$ 4.64  |          |
| $\geq 10$ <sup>d</sup>                                           | 56              | 16.6     |
| <b>Proteins intake (% of total energy)<sup>a</sup></b>           | 152 $\pm$ 2.91  |          |
| $< 15$ <sup>b</sup>                                              | 143             | 42.4     |
| <b>Total Cholesterol (mean <math>\pm</math> SD, mg/dl)</b>       | 210 $\pm$ 45    |          |
| % Elevated total cholesterol ( $\geq 200$ mg/dl) <sup>e</sup>    | 201             | 55.4     |
| <b>Triglycerides (mean <math>\pm</math> SD, mg/dl)</b>           | 138 $\pm$ 78    |          |
| % Elevated triglycerides ( $\geq 150$ mg/dl) <sup>e</sup>        | 114             | 31.4     |

|                                            |          |      |
|--------------------------------------------|----------|------|
| <b>VLDL (mean ± SD, mg/dl)</b>             | 27 ± 15  |      |
| % Elevated VLDL (≥30 mg/dl) <sup>e</sup>   | 106      | 29.2 |
| <b>LDL-C (mean ± SD, mg/dl)</b>            | 131 ± 39 |      |
| % Elevated LDL-C (≥130 mg/dl) <sup>e</sup> | 172      | 47.5 |
| <b>HDL-C (mean ± SD, mg/dl)</b>            | 51 ± 14  |      |
| % Reduced HDL-C (≤40 mg/dl) <sup>e</sup>   | 79       | 21.8 |

<sup>a</sup> Dietary variables are based on a sample of 337 subjects owing to missing data

<sup>b</sup> Macronutrient cutoffs are within the Acceptable Macronutrient Distribution Range (AMDR)<sup>25</sup>

<sup>c</sup> Saturated fat cutoff based on the WHO recommendations<sup>26</sup>

<sup>d</sup> Sugar intake cutoff based on the WHO recommendations<sup>27</sup>

<sup>e</sup> Lipid cutoff values based on the Adult Treatment Panel III guidelines<sup>21</sup>; Very Low Density Lipoprotein (VLDL); Low Density Lipoprotein cholesterol (LDL-C); High Density Lipoprotein cholesterol (HDL-C)

For peer review only

**Table 2a** Logistic regression analysis: associations of behavioral risks with total cholesterol (TC) and triglycerides (TG)

|                                |          | TC              |                  |                      | TG              |                  |                      |
|--------------------------------|----------|-----------------|------------------|----------------------|-----------------|------------------|----------------------|
|                                |          | % ≥200<br>mg/dl | Crude<br>OR (CI) | Adjusted*<br>OR (CI) | % ≥150<br>mg/dl | Crude<br>OR (CI) | Adjusted*<br>OR (CI) |
|                                | 0        | 52.0            | 1.00             | 1.00                 | 25.6            | 1.00             | 1.00                 |
| Number of<br>Cigarettes        | 1-19     | 55.8            | 1.17 (0.60-2.25) | 0.85 (0.40-1.77)     | 30.2            | 1.26 (0.62-2.58) | 1.06 (0.48-2.33)     |
|                                | 20-35    | 63.5            | 1.60 (0.90-2.85) | 1.01 (0.51-2.00)     | 38.1            | 1.79 (0.99-3.23) | 1.30 (0.67-2.53)     |
|                                | ≥40      | 63.3            | 1.59 (0.73-3.50) | 1.24 (0.48-3.18)     | 63.3            | 5.03 (2.26-11.2) | 4.27 (1.69-10.77)    |
|                                | p-trend  |                 | 0.070            | 0.783                |                 | <0.001           | 0.010                |
| Physical activity              | High     | 55.7            | 1.00             | 1                    | 25.0            | 1.00             | 1                    |
|                                | Moderate | 56.2            | 1.02 (0.59-1.77) | 0.89 (0.48-1.67)     | 32.2            | 1.43 (0.77-2.64) | 1.64 (0.83-3.25)     |
|                                | Low      | 55.6            | 0.99 (0.59-1.69) | 1.11 (0.31-2.00)     | 35.1            | 1.62 (0.90-2.92) | 1.75 (0.93-3.29)     |
| Alcohol intake                 | No       | 53              | 1                | 1                    | 31.5            | 1                | 1                    |
|                                | Yes      | 59              | 1.28 (0.84-1.96) | 1.52 (0.90-2.55)     | 31.3            | 0.99 (0.63-1.56) | 0.98 (0.57-1.69)     |
| Total fat intake<br>(% energy) | <30      | 54.8            | 1                | 1.00                 | 30.6            | 1                | 1                    |
|                                | ≥30      | 54.9            | 1.03 (0.57-1.74) | 1.15 (0.62-2.13)     | 31.3            | 1.03 (0.57-1.87) | 1.22 (0.34-2.35)     |
| Saturated Fat<br>(% energy)    | <10      | 52.2            | 1                | 1                    | 31              | 1                | 1                    |
|                                | ≥10      | 56.3            | 1.17 (0.75-1.85) | 1.73 (1.02-2.94)     | 31.3            | 1.01 (0.62-1.65) | 1.01 (0.59-1.74)     |
| Carbohydrates<br>(% energy)    | <55      | 53.8            | 1                | 1                    | 30.8            | 1                | 1                    |
|                                | ≥55      | 59.2            | 1.25 (0.73-2.12) | 1.07 (0.59-1.93)     | 32.4            | 1.07 (0.61-1.88) | 0.96 (0.52-1.76)     |
| Sugar intake<br>(% energy)     | <10      | 54.8            | 1                | 1                    | 32              | 1                | 1                    |
|                                | ≥10      | 55.4            | 1.02 (0.57-1.82) | 1.12 (0.59-2.16)     | 26.8            | 0.78 (0.41-1.48) | 0.86 (0.43-1.73)     |
| Protein intake<br>(% energy)   | <15      | 56.6            | 1                | 1                    | 36.4            | 1                | 1                    |
|                                | ≥15      | 53.6            | 0.88 (0.57-1.37) | 0.83 (0.50-1.37)     | 27.3            | 0.66 (0.41-1.05) | 0.79 (0.47-1.32)     |

\*Controlling for age, gender, education, marital status, caloric intake and BMI

**Table 2b** Logistic regression analysis: associations of behavioral risks with very low-density lipoprotein (VLDL), low-density lipoprotein cholesterol (LDL-C) and high-density lipoprotein cholesterol (HDL-C).

|                                |                   | VLDL          |                  |                      | LDL-C          |                  |                      | HDL-C         |                  |                      |
|--------------------------------|-------------------|---------------|------------------|----------------------|----------------|------------------|----------------------|---------------|------------------|----------------------|
|                                |                   | %≥30<br>mg/dl | Crude<br>OR (CI) | Adjusted*<br>OR (CI) | %≥130<br>mg/dl | Crude<br>OR (CI) | Adjusted*<br>OR (CI) | %<40<br>mg/dl | Crude<br>OR (CI) | Adjusted*<br>OR (CI) |
| Number of<br>Cigarettes        | 0                 | 24.2          | 1.00             | 1                    | 43.6           | 1.00             | 1                    | 18.1          | 1.00             | 1.00                 |
|                                | 1-19              | 27.9          | 1.21 (0.58-2.52) | 1.01 (0.45-2.25)     | 53.5           | 1.49 (0.77-2.86) | 1.12 (0.54-2.33)     | 18.6          | 1.04 (0.45-2.40) | 1.01 (0.39-2.63)     |
|                                | 20-39             | 35.5          | 1.72 (0.94-3.14) | 1.27 (0.64-2.51)     | 54.8           | 1.57 (0.89-2.76) | 0.97 (0.50-1.89)     | 28.6          | 1.81 (0.95-3.45) | 1.61 (0.75-3.45)     |
|                                | ≥40               | 56.7          | 4.09 (1.87-8.95) | 3.26 (1.33-8.03)     | 53.3           | 1.48 (0.69-3.17) | 0.96 (0.39-2.40)     | 40.0          | 3.02 (1.35-6.76) | 1.98 (0.77-5.08)     |
|                                | p-trend           |               | <0.001           | 0.030                |                | 0.078            | 0.946                |               | <0.001           | 0.106                |
| Physical<br>activity           | High              | 26.1          | 1.00             | 1                    | 48.9           | 1.00             | 1                    | 27.3          | 1.00             | 1                    |
|                                | Moderate          | 28.9          | 1.15 (0.62-2.13) | 1.27 (0.54-2.52)     | 49.6           | 1.02 (0.59-1.78) | 0.89 (0.48-1.65)     | 19.0          | 0.62 (0.32-1.20) | 0.93 (0.43-2.01)     |
|                                | Low               | 32.0          | 1.33 (0.74-2.39) | 1.44 (0.76-2.71)     | 46.0           | 0.89 (0.53-1.51) | 0.93 (0.52-1.65)     | 21.2          | 0.72 (0.40-1.32) | 0.69 (0.34-1.39)     |
| Alcohol intake                 | No                | 28.3          | 1                | 1                    | 43.4           | 1                | 1                    | 20.5          | 1                | 1                    |
|                                | Yes               | 30.8          | 1.12 (0.71-1.79) | 1.12 (0.65-1.93)     | 53.8           | 1.53 (1.00-2.33) | 1.68 (1.01-2.82)     | 23.6          | 1.19 (0.72-1.98) | 0.98 (0.54-1.78)     |
| Total fat intake<br>(% energy) | <30               | 29.0          | 1                | 1                    | 45.2           | 1                | 1                    | 25.8          | 1                | 1                    |
|                                | ≥ 30              | 28.8          | 0.99 (0.54-1.82) | 1.15 (0.59-2.22)     | 46.7           | 1.06 (0.61-1.85) | 1.26 (0.69-2.33)     | 21.8          | 0.80 (0.42-1.52) | 0.81 (0.39-1.65)     |
| Saturated Fat<br>(% energy)    | <10               | 29.2          | 1                | 1                    | 44.2           | 1                | 1                    | 20.4          | 1                | 1                    |
|                                | ≥ 10 <sup>s</sup> | 28.7          | 0.98 (0.59-1.61) | 0.96 (0.56-1.66)     | 47.5           | 1.15 (0.72-1.80) | 1.73 (1.02-2.93)     | 23.7          | 1.21 (0.70-2.16) | 1.16 (0.62-2.17)     |
| Carbohydrates<br>(% energy)    | <55               | 28.7          | 1                | 1                    | 45.7           | 1                | 1                    | 22.2          | 1                | 1                    |
|                                | ≥55               | 29.6          | 1.04 (0.59-1.86) | 0.96 (0.52-1.79)     | 49.3           | 1.16 (0.68-1.95) | 0.93 (0.52-1.67)     | 23.9          | 1.10 (0.60-2.05) | 1.18 (0.59-2.36)     |
| Sugar intake<br>(% energy)     | <10               | 29.6          | 1                | 1                    | 47.1           | 1                | 1                    | 23.8          | 1                | 1                    |
|                                | ≥10               | 25.0          | 0.79 (0.41-1.53) | 0.89 (0.44-1.82)     | 42.9           | 0.84 (0.47-1.50) | 0.89 (0.47-1.71)     | 16.1          | 0.61 (0.28-1.31) | 0.62 (0.26-1.45)     |
| Protein intake<br>(% energy)   | <15               | 32.9          | 1                | 1                    | 48.3           | 1                | 1                    | 21            | 1                | 1                    |
|                                | ≥15               | 25.9          | 0.71(0.44-1.15)  | 0.85 (0.50-1.44)     | 45.1           | 0.88 (0.57-1.36) | 0.75 (0.46-1.24)     | 23.7          | 1.17 (0.59-1.97) | 1.49 (0.82-2.72)     |

\*Controlling for age, gender, education, marital status, caloric intake and BMI

# BMJ Open

## Prevalence and associations of behavioral risk factors with blood lipids profile in Lebanese adults: findings from the WHO STEPwise NCD Survey

|                                 |                                                                                                                                                                                                                                                                                                                                                                                                                                                                                                  |
|---------------------------------|--------------------------------------------------------------------------------------------------------------------------------------------------------------------------------------------------------------------------------------------------------------------------------------------------------------------------------------------------------------------------------------------------------------------------------------------------------------------------------------------------|
| Journal:                        | <i>BMJ Open</i>                                                                                                                                                                                                                                                                                                                                                                                                                                                                                  |
| Manuscript ID                   | bmjopen-2018-026148.R2                                                                                                                                                                                                                                                                                                                                                                                                                                                                           |
| Article Type:                   | Research                                                                                                                                                                                                                                                                                                                                                                                                                                                                                         |
| Date Submitted by the Author:   | 13-May-2019                                                                                                                                                                                                                                                                                                                                                                                                                                                                                      |
| Complete List of Authors:       | Mansour, Megali; American University of Beirut Faculty of Health Sciences, EPHD<br>Tamim, Hani; American University of Beirut, Biostatistics Unit, Clinical Research Institute<br>Nasreddine, Lara; American University of Beirut<br>EL Khoury, Christelle; Tufts University School of Medicine<br>Hwalla, Nahla; American University of Beirut<br>Chaaya, Monique; American University of Beirut<br>Farhat, Antoine ; Notre Dame University<br>Sibai, Abla; American University of Beirut, EPHD |
| <b>Primary Subject Heading</b>: | Public health                                                                                                                                                                                                                                                                                                                                                                                                                                                                                    |
| Secondary Subject Heading:      | Epidemiology, Nutrition and metabolism, Smoking and tobacco, Public health                                                                                                                                                                                                                                                                                                                                                                                                                       |
| Keywords:                       | PUBLIC HEALTH, EPIDEMIOLOGY, Cigarette Smoking, Blood lipids                                                                                                                                                                                                                                                                                                                                                                                                                                     |
|                                 |                                                                                                                                                                                                                                                                                                                                                                                                                                                                                                  |

SCHOLARONE™  
Manuscripts

1  
2  
3 **Prevalence and associations of behavioral risk factors with blood lipids profile in**  
4  
5 **Lebanese adults: findings from the WHO STEPwise NCD Survey**  
6  
7  
8

9 Magali Mansour<sup>1†</sup>, Hani Tamim<sup>2†</sup>, Lara Nasreddine<sup>3</sup>, Christelle El Khoury<sup>4</sup>, Nahla Hwalla<sup>3</sup>,  
10 Monique Chaaya<sup>1</sup>, Antoine Farhat<sup>5</sup>, Abla M. Sibai<sup>1\*</sup>  
11  
12

13  
14 **Author affiliations**

15 <sup>1</sup> Department of Epidemiology and Population Health, Faculty of Health Sciences, American  
16 University of Beirut, P.O.Box 11-0236, Riad El-Solh, Beirut 1107 2020, Lebanon

17 <sup>2</sup> Department of Internal Medicine , American University of Beirut-Medical Center, P.O.Box  
18 11-0236, Riad El-Solh, Beirut 1107 2020, Lebanon  
19

20 <sup>†</sup> Equal Contribution  
21

22 <sup>3</sup> Faculty of Agricultural and Food Sciences, American University of Beirut, P.O.Box 11-  
23 0236, Riad El-Solh, Beirut 1107 2020, Lebanon  
24

25 <sup>4</sup> School of Medicine Department of Public Health, Tufts University, 136 Harrison Avenue,  
26 Boston, MA 02111, US  
27

28 <sup>5</sup> Faculty of Nursing and Health Sciences, Notre Dame University, Lebanon  
29  
30  
31  
32  
33  
34

35 **\*Corresponding author:**

36 **Abla M. Sibai**  
37  
38

39 Epidemiology and Population Health  
40 Faculty of Health Sciences  
41 American University of Beirut  
42 PO Box 11-0236  
43 Beirut-Lebanon  
44 Tel: +961-1-350000 ext. 4647  
45 Fax: +961-1-744470  
46 Email: am00@aub.edu.lb  
47  
48  
49  
50  
51  
52  
53  
54  
55  
56  
57  
58  
59  
60

1  
2  
3 **Keywords:** Cardiovascular disease, smoking, alcohol consumption, physical inactivity,  
4  
5 dietary intake, blood lipids, Lebanon  
6  
7  
8  
9

10 **Word count (excluding title page, references, tables and figures):** 3141  
11  
12  
13  
14  
15  
16  
17  
18  
19  
20  
21  
22  
23  
24  
25  
26  
27  
28  
29  
30  
31  
32  
33  
34  
35  
36  
37  
38  
39  
40  
41  
42  
43  
44  
45  
46  
47  
48  
49  
50  
51  
52  
53  
54  
55  
56  
57  
58  
59  
60

For peer review only

## Abstract

**Objective:** To examine associations of behavioral risk factors, namely cigarette smoking, physical activity, dietary intakes and alcohol consumption, with blood lipids profile.

**Design and participants:** Data drawn from a cross-sectional study involving participants aged 18 years and over (n = 363) from the nationwide WHO Stepwise Nutrition and Non-communicable Disease Risk Factor survey in Lebanon.

**Measures:** Demographic characteristics, behaviors and medical history were obtained from participants by questionnaire. Dietary assessment was performed using a 61-item culture-specific food frequency questionnaire that measured food intake over the past year. Lipid levels were measured by analysis of fasting blood samples (serum total cholesterol (TC), triglycerides (TG), very low-density lipoprotein (VLDL), low-density lipoprotein cholesterol (LDL-C) and high-density lipoprotein cholesterol (HDL-C).

**Results:** Current cigarette smoking, alcohol consumption and low physical activity were prevalent among 33.3%, 39.7%, and 41.6% of the sample, respectively. The contributions of fat and saturated fat to daily energy intake were high, estimated at 36.5% and 11.4%, respectively. Abnormal levels of TC, TG, VLDL, LDL-C, and HDL-C were observed for 55.4%, 31.4%, 29.2%, 47.5% and 21.8% of participants, respectively. Adjusting for potential confounders, cigarette smoking was positively associated with higher odds of TG and VLDL (OR=4.27; 95% CI 1.69-10.77; and 3.26; 95% CI 1.33-8.03, respectively) with a significant dose-response relationship (p-value for trend=0.010 and 0.030, respectively). Alcohol drinking and high saturated fat intake ( $\geq 10\%$  energy intake) were associated with higher odds of LDL-C (OR=1.68; 95% CI: 1.01-2.82 and OR= 1.73; 95% CI: 1.02-2.93). Physical activity did not associate significantly with any blood lipid parameter.

**Conclusion:** The demonstrated positive associations between smoking, alcohol drinking and high saturated fat intake with adverse lipoprotein levels lay further evidence for clinical

1  
2  
3 practitioners, public health professionals and dietitians in the development of preventive  
4  
5 strategies among subjects with high risk of CVDs in Lebanon.  
6  
7  
8  
9  
10  
11  
12  
13  
14  
15  
16  
17  
18  
19  
20  
21  
22  
23  
24  
25  
26  
27  
28  
29  
30  
31  
32  
33  
34  
35  
36  
37  
38  
39  
40  
41  
42  
43  
44  
45  
46  
47  
48  
49  
50  
51  
52  
53  
54  
55  
56  
57  
58  
59  
60

For peer review only

### Strengths and limitations

- A nationwide survey administered in Lebanon, following the WHO STEPwise approach to surveillance guidelines, thus allowing for comparison with international literature.
- Low response rate (27.3%) for those who consented and gave fasting blood samples. Yet, differences between responders and non-responders were not significant on a number of socio-demographic characteristics.
- Whilst data on smoking, physical activity and dietary intakes were sufficiently detailed, measures of exposure to alcohol consumption lacked information on intensity and type, and may be prone to misclassification bias.
- Attention to associations between behavioral factors and dietary intakes with intermediary metabolic conditions along the causal pathway for CVD informs work towards development of tailored preventive strategies for high risk individuals.

## Introduction

The prevalence of cardiovascular diseases (CVD) is growing worldwide, and has reached epidemic levels, affecting both developed and developing countries.<sup>1</sup> The Middle East and North Africa countries represent a region which is now facing a fast rate of development and urbanization, with rates of chronic diseases increasing at an alarming rate and exceeding at times those of developed countries.<sup>2</sup> In Lebanon, a small middle-income country at the Eastern Mediterranean shore, data from the World Health Organization (WHO) indicate that the proportional mortality from CVD alone is 45%, making it the highest among all non-communicable diseases (NCDs).<sup>3</sup> With a population estimate of around 4.2 million and a Gross Domestic Product (GDP) of close to 8,520 US Dollars per capita, Lebanon is characterized by a high urbanization rate (87%), a growing trend towards survival in later life, coupled with westernization and modernization in diet and lifestyle and higher uptake of NCD risk factors.<sup>4</sup>

The primary goal in the prevention and management of CVD is to identify and modify the underlying risk behaviors that are amenable to intervention, namely, cigarette smoking, physical inactivity, dietary intakes and alcohol consumption. Associations between these factors and CVD risk through their effect on blood lipid levels have been widely examined in the western literature. Studies have shown that smokers are 2-4 times more at risk of developing heart disease than nonsmokers<sup>5</sup> and the number of cigarettes smoked/day independently predicts higher levels of Total Cholesterol (TC), Low Density Lipoprotein-Cholesterol (LDL-C), and Triglycerides (TG).<sup>6</sup> Also, smoking cessation has been shown to improve High Density Lipoprotein-Cholesterol (HDL-C) levels.<sup>7</sup> Cigarette smoking is described as a strong inflammation mediator and a key promoter in the atherosclerotic process. Similarly, the anti-inflammatory effect of frequent physical activity has been noted to be the reason behind reduced heart disease risk among physically active individuals.<sup>8</sup>

1  
2  
3 Regular physical activity with weight reduction has a large beneficial impact on the  
4 lipoproteins profile of adult men and women,<sup>9</sup> by increasing plasma volume, decreasing  
5 blood thickness, and thus reducing LDL-C concentrations.<sup>10</sup> Also, systematic reviews and  
6 meta-analysis of intervention studies have shown that heavy alcohol drinking results in an  
7 elevation in triglyceride levels, while moderate consumption increases circulating levels of  
8 HDL-C.<sup>11</sup> Similarly, diet is recognized as a modifiable risk factor that can make a  
9 substantial contribution to the risk of CVD.<sup>12 13</sup> Energy intake, the types of fatty acids  
10 consumed and the level of sugar ingestion may impact the lipid and cardiometabolic  
11 profile.<sup>14</sup> The 2017 Presidential Advisory from the American Heart Association indicated that  
12 replacement of saturated fat with unsaturated fatty acids decreases LDL-C levels and CVD  
13 risk, while replacing it with refined carbohydrates and sugar, yields no significant benefits to  
14 cardiovascular health.<sup>14</sup>

15  
16  
17  
18  
19  
20  
21  
22  
23  
24  
25  
26  
27  
28  
29  
30  
31  
32  
33  
34  
35  
36  
37  
38  
39  
40  
41  
42  
43  
44  
45  
46  
47  
48  
49  
50  
51  
52  
53  
54  
55  
56  
57  
58  
59  
60  
Much of the above evidence comes from studies conducted in North American and  
European countries and to a lesser extent from the Far East, mostly among Japanese and  
Korean population. Arab populations including the Lebanese have quite different risk  
behaviors, varied dietary habits and risk profile,<sup>15</sup> and studies evaluating the association  
between behaviors and intermediary variables along the causal pathway of CVD  
including lipid levels remain scarce in the region. Compared with other neighboring  
countries, Lebanon was shown to have one of the highest prevalence estimates of  
metabolic syndrome,<sup>16</sup> and has been witnessing high rates of smoking, among both  
adult men and women aged 18 years and over (42.9% and 27.5%, respectively).<sup>17</sup> Using  
data from a nationwide population-based survey of Lebanese adults, this study aims to  
examine the relation between behavioral risk factors including cigarette smoking,  
physical activity, dietary intakes and alcohol consumption with serum lipids and  
lipoproteins, while taking into account several potential confounding factors. Findings

1  
2  
3 from this study inform prevention strategies among subjects with high risk of CVD in  
4  
5 the country.  
6  
7  
8  
9

## 10 **Methods**

### 11 **Study design and participants**

12  
13  
14  
15  
16 The data presented in this study are derived from the WHO Nutrition and Non-  
17  
18 Communicable Diseases Risk Factor (NNCD-RF) cross-sectional household survey  
19  
20 conducted in Lebanon in 2009.<sup>18</sup> Using multi-stage stratified cluster study design, the  
21  
22 sampling was based on the age-sex distribution of the Lebanese population as provided by the  
23  
24 Central Administration for Statistics. One adult was randomly selected from each household  
25  
26 using Kish methodology.<sup>19</sup> Pregnant and lactating women and individuals with mental  
27  
28 disabilities were excluded. With a non-response rate of 10% at the individual level, this  
29  
30 yielded a sample of 2668 survey participants aged 18 years and above. Those free from  
31  
32 known history of hyperlipidemia and diabetes in the first phase of the study (n = 1,331) were  
33  
34 approached to undergo a biochemical assessment, of which 363 provided written consent and  
35  
36 gave fasting blood samples. Further details on the design and sample of the survey are  
37  
38 published elsewhere.<sup>4</sup> The study protocol was approved by the Institutional Review Board of  
39  
40 the American University of Beirut (AUB), and informed consent was taken from all  
41  
42  
43  
44  
45  
46  
47  
48  
49 participants.

### 50 **Data collection**

51  
52 The data collection procedure followed the WHO STEPwise approach to Surveillance,<sup>20</sup> and  
53  
54 included the following three steps: Step 1 Questionnaire, whereby information about socio-  
55  
56 demographic characteristics, NCDs and NCD risk factors, including dietary intake, were  
57  
58 collected through face-to-face interviews; Step 2 in which anthropometric and blood pressure  
59  
60

1  
2  
3 measurements were taken using standardized techniques and calibrated equipment; and  
4  
5 finally, Step 3 in which biochemical analysis for assessment of the blood lipid profile was  
6  
7 performed on blood samples collected after an overnight fast of at least 8 hours. Serum was  
8  
9 centrifuged on site and shipped on dry ice to the AUB Laboratory.  
10  
11  
12  
13

### 14 **Measures of blood lipids**

15  
16 Levels of blood lipids including TC, TG, very low density lipoprotein (VLDL), LDL-C and  
17  
18 HDL-C were analyzed using the Vitros 350 analyzer, an enzymatic spectrophotometric  
19  
20 technique. The inter-assay variation of measurements did not exceed 4%. Quality control was  
21  
22 performed within each run using standard performance verifier solutions provided by Ortho-  
23  
24 Clinical Diagnostics. Analyses were conducted in duplicates, and the average value was  
25  
26 utilized in the analysis. Based on the Adult Treatment Panel III guidelines,<sup>21</sup> the cutoff points  
27  
28 used for the definition of risk levels of TC, TG, VLDL, LDL-C and HDL-C were  $\geq 200$ ,  
29  
30  $\geq 150$ ,  $\geq 30$ ,  $\geq 130$  and  $\leq 40$  mg/dl, respectively.  
31  
32  
33  
34  
35  
36  
37

### 38 **Behavioral risk factors and other measures**

39  
40 Behavioral risk factors examined in this study included cigarette smoking, physical activity,  
41  
42 and alcohol consumption. Cigarette smoking status (never, past and current) and intensity  
43  
44 (number of cigarettes smoked/day) were assessed. Intensity was later categorized into three  
45  
46 levels according to number of cigarettes/day (1 to 19, 20 to 39 and  $\geq 40$ ). The short version of  
47  
48 the International Physical Activity Questionnaire was used to assess physical activity among  
49  
50 participants.<sup>22</sup> Three categories of physical activity (low, moderate, and high) were assigned  
51  
52 based on METs-min/week (MET-min being the product of the resting metabolic rate for an  
53  
54 activity and the number of minutes taken to perform it). Alcohol-related behavior was  
55  
56 assessed as a dichotomous variable (ever vs never). Dietary assessment was performed using  
57  
58  
59  
60

1  
2  
3 a 61-item culture-specific food frequency questionnaire that measured food intake over the  
4  
5 past year.<sup>4, 15</sup> Intakes of energy and macronutrients were estimated using the food  
6  
7 composition database of the Nutritionist IV software, and the food composition table for local  
8  
9 and traditional Middle-Eastern foods.<sup>23,24</sup> Intakes of carbohydrates, fat and protein were  
10  
11 compared to cut-offs within the Acceptable Macronutrient Distribution Range,<sup>25</sup> and intakes  
12  
13 of saturated fat and sugar were compared to the recommendations of the WHO.<sup>26, 27</sup>  
14  
15  
16  
17  
18

19  
20 Covariates of interest included total daily caloric intake and body mass index (BMI),  
21  
22 measured as the ratio of weight (kilograms) to the square of height (meters). In addition,  
23  
24 gender, age (18-29, 30-39, 40-49, 50-59, and  $\geq 60$ ), marital status (single, married,  
25  
26 divorced/widowed), education level (complementary or less, secondary/technical, university  
27  
28 and above), and occupational status (student/volunteer, working, does not  
29  
30 work/housewife/retired) were considered as potential covariates.  
31  
32  
33  
34

### 35 **Patient and Public Involvement**

36  
37 This study is based on secondary data analyses. The original data collection tool was adapted  
38  
39 from the WHO STEPwise approach to NCD risk factor surveillance,<sup>20</sup> that did not directly  
40  
41 involve patients or the public in outcome development or conduct of the study. However, we  
42  
43 have been engaging with stakeholders to disseminate the findings on NCD risk factors,  
44  
45 including tobacco consumption and dietary intakes, and on associations with various health-  
46  
47 related outcomes to the public at large.  
48  
49  
50  
51  
52

### 53 **Statistical analysis**

54  
55 Means, standard deviations (SD) and frequencies were used to describe the various socio-  
56  
57 demographic, behavioral, nutritional and clinical characteristics of the participants. The  
58  
59  
60

1  
2  
3 associations between each of the risk factors and levels of the different blood lipids were  
4  
5 examined using multiple logistic regression analysis. Unadjusted and adjusted odds ratios  
6  
7 (ORs) and their 95% confidence intervals (CIs) controlling for age, gender, education, marital  
8  
9 status, caloric intake and BMI were estimated. Test for trend with increasing number of daily  
10  
11 amount of cigarettes smoked was also conducted, and a two-sided p-value < 0.05 was  
12  
13 considered significant. The Statistical Package for the Social Sciences 22.0.1 (SPSS Inc.,  
14  
15 Chicago, IL, USA) was used for all computations.  
16  
17  
18  
19  
20  
21  
22  
23

## 24 **Results**

25  
26  
27 The socio-demographic and health-related characteristics of the study sample are summarized  
28  
29 in Table 1. The sample was equally divided by gender (49.9% females and 50.1% males),  
30  
31 with a mean age of  $39.2 \pm 15.2$  years (range 18 to 92 years). The majority were married  
32  
33 (60.6%), and close to half of the participants were employed (52.3%) at the time of the study,  
34  
35 with a high percentage having less than complementary education (39.7%). Ever smokers  
36  
37 constituted 37.5% of the sample, 41.6% were classified as being engaged in low-intensity  
38  
39 physical activity, and 39.7% reported ever alcohol drinkers. Average daily energy intake was  
40  
41 estimated at  $2656 \pm 1249$  Kcal/day, with 36.5% of caloric intake from fat, 11.4% from  
42  
43 saturated fat, 49.1% from carbohydrates, 5.7% from sugar, and 15.2% from protein.  
44  
45 Abnormal levels of TC, TG, VLDL, LDL-C, and HDL-C were observed for 55.4%, 31.4%,  
46  
47 29.2%, 47.5% and 21.8% of the participants, respectively.  
48  
49  
50  
51  
52  
53  
54  
55  
56  
57  
58  
59  
60

Insert table 1 around here

1  
2  
3 Tables 2a and 2b show the unadjusted and adjusted ORs for the association between  
4 behavioral risk factors and dietary variables with blood lipids levels. Associations with  
5 cigarette smoking were positive for most outcomes but significant for those consuming more  
6 than 40 cigarettes/day, compared to non-smokers, in the case of TG (unadjusted OR = 5.03)  
7 and VLDL (OR = 4.09) and HDL-C OR = 3.02). Adjusting for potential confounders, the  
8 associations maintained statistical significance for TG and VLDL, with an adjusted OR of  
9 4.27 (95% CI 1.69- 10.77) and 3.26 (95% CI 1.33-8.03), respectively. Results showed a dose-  
10 response relationship with increasing number of cigarettes consumed for (p-value for trend =  
11 0.010 and 0.030, respectively). In addition, a statistically significant association was observed  
12 between ever alcohol drinking and LDL-C (OR=1.53). This association retained statistical  
13 significance even after adjustment for potential confounders with an OR of 1.68 (95% CI  
14 1.01-2.82). Out of all the dietary variables examined, only saturated fat was associated with  
15 blood lipids, namely TC and LDL-C, with an adjusted OR of 1.73 for both lipid abnormalities  
16 (95% CI 1.02-2.94 and 1.02-2.93, respectively). Physical activity was not associated with any  
17 of the blood lipid parameters.  
18  
19  
20  
21  
22  
23  
24  
25  
26  
27  
28  
29  
30  
31  
32  
33  
34  
35  
36  
37  
38  
39  
40  
41  
42  
43  
44  
45  
46  
47  
48  
49

Insert tables 2a and 2b around here

## 50 Discussion

51 Our results showed that heavy cigarette smoking is associated with increased levels of TG  
52 and VLDL, with findings showing significant dose-response relationships with increasing  
53 number of cigarettes smoked per day. The study also showed that alcohol drinking and high  
54 saturated fat intake are significantly associated with higher levels of LDL-C. However, there  
55 were no consistent associations between physical activity and fasting blood lipids profile. To  
56  
57  
58  
59  
60

1  
2  
3 our knowledge, this is the first study in Lebanon to explore these associations, based on  
4 objectively measured lipid parameters and using standardized laboratory techniques and  
5  
6 tools, while taking into consideration the effect of potential confounders.  
7  
8  
9

10  
11 There are strong indicators in the literature that the deleterious effect of cigarette smoking on  
12 heart disease and atherosclerosis is partially explained by the effect of smoking on the  
13 concentration of blood lipids and lipoproteins. Our study confirms the results of earlier cross-  
14 sectional studies showing that the association between smoking and lipoproteins are observed  
15 in the levels of TG, VLDL and HDL-C, <sup>6, 28, 29</sup> with the impact on lipid levels increasing with  
16 increase in the number of cigarettes smoked/day in a dose dependent relationship. <sup>30, 31</sup> Our  
17 observation of the largest effect of cigarette smoking on lipid parameters being seen in those  
18 who smoked more than two packs a day is also consistent with Chen et al. study comprising  
19 of 1,164 men in Taiwan. <sup>32</sup> One popular mechanism by which smoking affects lipoproteins is  
20 that cigarette particulate matter alters catecholamine release—and thus free fatty acid release,  
21 which in turn contributes to the accumulation of the LDL-C concentrations and to lower  
22 levels of HDL-C in the blood. <sup>33</sup> The association between cigarette smoking and the increase  
23 in TG can also be explained by the decrease in the activity of the lipoprotein lipase among  
24 smokers thus disrupting lipid and lipoprotein metabolism. Furthermore, smoking cessation  
25 was found to improve lipid and lipoprotein levels in observational studies and randomized  
26 clinical trials. <sup>7, 34</sup> Taken together, the totality of evidence from these studies and our data-  
27 including consistency upon replication across various studies, the dose-response relationship,  
28 the magnitude and significance of association, biological plausibility as well as effects of  
29 smoking cessation on lipoprotein levels, supports a strong relationship between smoking and  
30 lipid profiles.  
31  
32  
33  
34  
35  
36  
37  
38  
39  
40  
41  
42  
43  
44  
45  
46  
47  
48  
49  
50  
51  
52  
53  
54  
55  
56  
57  
58  
59  
60

1  
2  
3 Our study showed that alcohol drinking was associated with higher LDL-C levels in  
4  
5 Lebanese adults but was not associated with other lipid parameters. Available evidence on  
6  
7 the impact of alcohol on LDL-C is conflicting with recent studies suggesting that the  
8  
9 association of alcohol and LDL-C levels may be population-specific.<sup>35</sup> For instance, studies  
10  
11 conducted amongst Danish adults reported an inverse association between alcohol intake and  
12  
13 LDL-C,<sup>36</sup> while studies conducted in Spanish and Italian populations found that higher  
14  
15 alcohol consumption was associated with increased LDL-C.<sup>37,38</sup> According to a review by  
16  
17 Brinton (2012), these inconsistent findings on the association between alcohol intake and  
18  
19 LDL-C, may be explained by allele-specific genetic effects, such as the Apo E4 and Apo A5  
20  
21 genes.<sup>39</sup> In our study, alcohol drinking was not associated with HDL-C levels. Findings on  
22  
23 the relationship between alcohol and HDL-C have in fact been less consistent in the  
24  
25 literature, with some but not all showing an effect on higher HDL-C levels.<sup>40,41</sup> Indeed, the  
26  
27 effect of alcohol on CVD including coronary artery disease, stroke and myocardial infarction  
28  
29 appears to be biphasic showing a J or U-shaped relationship based on the amount of alcohol  
30  
31 consumed,<sup>41,42</sup> with lower CVD mortality risks by light to moderate alcohol consumption  
32  
33 and increased risk by heavy alcohol intake.<sup>43</sup> The discrepancy between our results with those  
34  
35 in the literature may be due to differences in race/ethnicity and genetic variations,<sup>44</sup>  
36  
37 Alternatively, this discrepancy may be due to the definition of alcohol exposure adopted in  
38  
39 our study which was based on a dichotomous variable (ever vs never), and thus does not  
40  
41 capture alcohol intake in terms of frequency, intensity, types and pattern of alcohol  
42  
43 consumed. It is important to also acknowledge that alcohol consumption may be subject to  
44  
45 reporting bias in the Lebanese society due to cultural or religious norms. The observed  
46  
47 association between alcohol and lipid profile should therefore be interpreted with caution, as  
48  
49 it may have been the artifact of other social or lifestyle factors that were not measured in our  
50  
51 study.  
52  
53  
54  
55  
56  
57  
58  
59  
60

1  
2  
3 Dietary intakes are amongst the modifiable risk factors that may modulate plasma lipids and  
4 the risk of CVD. In our study, saturated fat was the only dietary factor that was significantly  
5 associated with lipid parameters, and specifically with TC and LDL-C. Despite the  
6 increasing controversy around the relationship between saturated fat and blood cholesterol  
7 levels, an increasing body of evidence highlights the strong atherogenicity of saturated fatty  
8 acids through their impact on LDL-C.<sup>14</sup> A systematic review and meta-regression analysis  
9 published in 2016 showed that a decrease in saturated fats of 1% of daily energy intake  
10 coupled with an increase of 1% in polyunsaturated fat, lowered LDL cholesterol by 2.1  
11 mg/dL.<sup>45</sup> In 2017, a Presidential Advisory from the American Heart Association (AHA)  
12 concluded that available evidence strengthens the long-standing AHA recommendations to  
13 decrease saturated fat intake and replace it with unsaturated fats. The AHA Advisory  
14 highlighted that the shift from saturated to unsaturated fats should occur in the context of an  
15 overall healthful dietary pattern such as the DASH or Mediterranean patterns.<sup>14</sup>

16  
17  
18 In our study, physical activity did not appear to be associated with lipid parameters. The  
19 literature suggests that physical activity increases the level of HDL-C and has beneficial  
20 effects on lipoprotein particle size and number.<sup>46</sup> Also, moderate intensity exercise is known  
21 to have a more favorable effect on blood lipids since it allows the use of lipids as a fuel  
22 source which implies an increase in the uptake and oxidation of the lipids in the skeletal  
23 muscle.<sup>46</sup>

24  
25  
26 Some other limitations should be taken into consideration when interpreting the results of our  
27 study. Because the study used a cross-sectional design, findings only imply associations and  
28 causal relationships cannot be established. The proportion of participants who gave fasting  
29 blood samples (of at least 8 hours) was relatively small (27.3%); however, responders were  
30 comparable to non-responders on a number of socio-demographic characteristics except for

1  
2  
3 marital status (61% of responders vs. 50% of non-responders were married). Also, we had  
4  
5 earlier documented comparable dietary data between respondents and non-respondents based  
6  
7 on factor loading matrices on patterns of food groups intake.<sup>4</sup> As mentioned earlier,  
8  
9 measures of exposure were self-reported which can introduce some misclassification error.  
10  
11 This may have been particularly problematic in the case of alcohol consumption, given that  
12  
13 our definition based on a dichotomous variable of “ever” vs “never” does not allow for the  
14  
15 assessment of drinking frequency and patterns or the type of alcohol consumed. In contrast,  
16  
17 our measurement of cigarette smoking and physical activity were more detailed and reliable.  
18  
19 Information on cigarette smoking in our study included the amount of cigarettes smoked and  
20  
21 the standardized IPAQ was used to assess physical activity.  
22  
23  
24  
25  
26

27 To conclude, our results suggest that smoking, alcohol drinking and high saturated fat are  
28  
29 associated with adverse levels of lipoprotein, among Lebanese men and women. There is  
30  
31 enough evidence in the literature indicating the role of lipoproteins in atherogenesis and that  
32  
33 controlling for blood lipid levels decreases the risk of heart and many other chronic diseases.  
34  
35 Our findings lay further evidence for clinical practitioners, public health professionals and  
36  
37 dieticians regarding the potential benefits of lifestyle and dietary modifications in their  
38  
39 pursuit to curb the burden of hyperlipidemia and CVD at the individual and population level.  
40  
41 The overall high rate of smoking behavior in Lebanon among both men and women, coupled  
42  
43 with the shift in dietary patterns towards high fat energy dense foods,<sup>7, 15</sup> are likely to  
44  
45 adversely impact on the healthcare bill in the country. Further studies with larger sample size  
46  
47 that examine the association of combination patterns of poor lifestyle factors on lipid profile  
48  
49 among Lebanese adults are warranted.  
50  
51  
52  
53  
54  
55  
56  
57  
58  
59  
60

**Contributors**

MM conducted initial analyses and wrote the first draft, in partial fulfillment of her MSc in Epidemiology. HT supervised the conduct of analyses and contributed to the write-up. LN conducted the dietary analyses and contributed to the write-up and revisions. CK, NH, MC and AF provided statistical advice and contributed to the paper revisions. AMS coordinated original study conduct, conceived and finalized the analyses, and contributed substantially to the write-up and revisions. All authors read and approved the final version of the manuscript.

**Funding statement**

The original study conduct was funded by the World Health Organization (WHO) - Lebanon. However, no funds were available for this secondary analysis.

**Data sharing statement**

The dataset was available for all authors of the study and will be available for other non-commercial researchers upon request.

**Declaration of conflicting interests**

The authors declare that there is no conflict of interest.

## REFERENCES

1. Roth GA, Johnson C, Abajobir A, Abd-Allah F, Abera SF, Abyu G et al. Global, Regional, and National Burden of Cardiovascular Diseases for 10 Causes, 1990 to 2015. *Journal of the American College of Cardiology*. 2017;70:1-25.
2. Sibai AM, Nasreddine L, Mokdad AH, Adra N, Tabet M, Hwalla N. Nutrition transition and cardiovascular disease risk factors in Middle East and North Africa countries: reviewing the evidence. *Annals of Nutrition and Metabolism*. 2010;57:193-203.
3. World Health Organization. Non-communicable Diseases Country Profiles 2014.
4. Naja F, Nasreddine L, Itani L, Adra N, Sibai A, Hwalla N. Association between dietary patterns and the risk of metabolic syndrome among Lebanese adults. *European Journal of Nutrition*. 2013;52:97-105.
5. US Department of Health and Human Services. The health consequences of smoking—50 years of progress: a report of the Surgeon General. Atlanta (GA): The health consequences of smoking—50 years of progress: a report of the Surgeon General: Centers for Disease Control and Prevention (US), National Center for Chronic Disease Prevention and Health Promotion, Office on Smoking and Health; 2014.
6. Gossett LK, Johnson HM, Piper ME, Fiore MC, Baker TB, Stein JH. Smoking intensity and lipoprotein abnormalities in active smokers. *Journal of Clinical Lipidology*. 2009;3:372-8.
7. Gepner AD, Piper ME, Johnson HM, Fiore MC, Baker TB, Stein JH. Effects of smoking and smoking cessation on lipids and lipoproteins: outcomes from a randomized clinical trial. *American Heart Journal*. 2011;161:145-51.
8. Abramson JL, Vaccarino V. Relationship between physical activity and inflammation among apparently healthy middle-aged and older US adults. *Archives of Internal Medicine*. 2002;162:1286-92.
9. Barengo NC, Kastarinen M, Lakka T, Nissinen A, Tuomilehto J. Different forms of physical activity and cardiovascular risk factors among 24–64-year-old men and women in Finland. *European Journal of Cardiovascular Prevention & Rehabilitation*. 2006;13:51-9.
10. Thompson PD, Crouse SF, Goodpaster B, Kelley D, Moyna N, Pescatello L. The acute versus the chronic response to exercise. *Medicine and Science in Sports and Exercise*. 2001;33:S438-45.
11. Brien SE, Ronksley PE, Turner BJ, Mukamal KJ, Ghali WA. Effect of alcohol consumption on biological markers associated with risk of coronary heart disease: systematic review and meta-analysis of interventional studies. *BMJ*. 2011;342:d636.
12. Wang Q, Afshin A, Yakoob MY, Singh GM, Rehm CD, Khatibzadeh S, on behalf of the Global Burden of Diseases. Nutrition and Chronic Diseases Expert Group (NutriCoDE). Impact of Nonoptimal Intakes of Saturated, Polyunsaturated, and Trans Fat on Global Burdens of Coronary Heart Disease. *J Am Heart Assoc*. 2016;5:e002891

13. Stone NJ, Robinson JG, Lichtenstein AH, Noel Bairey Merz C, Blum CB, Eckel RH, et al. 2013 ACC/AHA guideline on the treatment of blood cholesterol to reduce atherosclerotic cardiovascular risk in adults: a report of the American College of Cardiology/American Heart Association Task Force on Practice Guidelines. *Journal of the American College of Cardiology*. 2014;63:2889-934.
14. Sacks FM, Lichtenstein AH, Wu JH, Appel LJ, Creager MA, Kris-Etherton PM, et al. Dietary fats and cardiovascular disease: a presidential advisory from the American Heart Association. *Circulation*. 2017;13:e1-e23.
15. Naja F, Nasreddine L, Itani L, Chamieh MC, Adra N, Sibai AM, et al. Dietary patterns and their association with obesity and sociodemographic factors in a national sample of Lebanese adults. *Public Health Nutrition*. 2011;14:1570-8.
16. Sibai AM, Obeid O, Batal M, Adra N, El Khoury D, Hwalla N. Prevalence and correlates of metabolic syndrome in an adult Lebanese population. *CVD Prevention & Control*. 2008;3:83-90.
17. Sibai AM, Iskandarani M, Darzi A, Nakkash R, Saleh S, Fares S, et al. Cigarette smoking in a Middle Eastern country and its association with hospitalisation use: a nationwide cross-sectional study. *BMJ Open*. 2016;6:e009881.
18. Sibai AM, Hwalla N. WHO STEPS Chronic Disease Risk Factor Surveillance: Data Book for Lebanon. 2010.  
[https://www.who.int/ncds/surveillance/steps/2008\\_STEPS\\_Lebanon.pdf](https://www.who.int/ncds/surveillance/steps/2008_STEPS_Lebanon.pdf)
19. Lavrakas PJ. *Encyclopedia of survey research methods*: Sage Publications; 2008.
20. World Health Organization (WHO). *Noncommunicable diseases and their risk factors- STEPS Manual*. <http://www.who.int/ncds/surveillance/steps/manual/en/>
21. National Cholesterol Education Program Adult Treatment Panel III. Third Report of the National Cholesterol Education Program (NCEP) Expert Panel on Detection, Evaluation, and Treatment of High Blood Cholesterol in Adults (Adult Treatment Panel III) final report. *Circulation*. 2002;106:3143-421.
22. IPAQ Research Committee. *Guidelines for data processing and analysis of the International Physical Activity Questionnaire (IPAQ)—short and long forms*. 2005.
23. Nutritionist IV. *N-squared computing*: Silverton; 1998. 31.
24. Pellet P, Shadarevian S. *Food composition. Tables for use in the Middle East*. In: *Food composition tables for use in the Middle East*. 2nd ed. 1970.
25. Institute of Medicine. *Dietary Reference Intakes for Energy, Carbohydrate, Fiber, Fat, Fatty Acids, Cholesterol, Protein, and Amino Acids*. Washington, DC: The National Academies Press. 2005; <https://doi.org/10.17226/10490>.
26. Food and Agriculture Organization/World Health Organization. *Interim Summary of Conclusions and Dietary Recommendations on Total Fat & Fatty Acids*. 2008; [https://www.who.int/nutrition/topics/FFA\\_summary\\_rec\\_conclusion.pdf?ua=1](https://www.who.int/nutrition/topics/FFA_summary_rec_conclusion.pdf?ua=1).
27. World Health Organization. *Guideline: Sugars intake for adults and children*. 2015; [http://apps.who.int/iris/bitstream/handle/10665/149782/9789241549028\\_eng.pdf;jsessionid=2A114891D4D08F644AA154370830829B?sequence=1](http://apps.who.int/iris/bitstream/handle/10665/149782/9789241549028_eng.pdf;jsessionid=2A114891D4D08F644AA154370830829B?sequence=1).
28. Yu M, Xu C-X, Zhu H-H, Hu R-Y, Zhang J, Wang H, et al. Associations of cigarette smoking and alcohol consumption with metabolic syndrome in a male Chinese population: a cross-sectional study. *Journal of Epidemiology*. 2014;24:361-9.

- 1
  - 2
  - 3
  - 4
  - 5
  - 6
  - 7
  - 8
  - 9
  - 10
  - 11
  - 12
  - 13
  - 14
  - 15
  - 16
  - 17
  - 18
  - 19
  - 20
  - 21
  - 22
  - 23
  - 24
  - 25
  - 26
  - 27
  - 28
  - 29
  - 30
  - 31
  - 32
  - 33
  - 34
  - 35
  - 36
  - 37
  - 38
  - 39
  - 40
  - 41
  - 42
  - 43
  - 44
  - 45
  - 46
  - 47
  - 48
  - 49
  - 50
  - 51
  - 52
  - 53
  - 54
  - 55
  - 56
  - 57
  - 58
  - 59
  - 60
29. Berlin I, Lin S, Lima JA, Bertoni AG. Smoking status and metabolic syndrome in the multi-ethnic study of atherosclerosis. A cross-sectional study. *Tobacco Induced Diseases*. 2012;10:9-16.
30. Bišanović S, Mehić B, Sivić S. Status of lipids and the frequency diseases of cardiovascular origin in smokers according to the length period of smoking and number of cigarettes smoked daily. *Bosnian Journal of Basic Medical Sciences*. 2011;11:46-51.
31. Slagter SN, van Vliet-Ostaptchouk JV, Vonk JM, Boezen HM, Dullaart RP, Koblold ACM, et al. Associations between smoking, components of metabolic syndrome and lipoprotein particle size. *BMC Medicine*. 2013;11:195-209.
32. Chen C-C, Li T-C, Chang P-C, Liu C-S, Lin W-Y, Wu M-T, et al. Association among cigarette smoking, metabolic syndrome, and its individual components: the metabolic syndrome study in Taiwan. *Metabolism*. 2008;57:544-8.
33. Campbell SC, Moffatt RJ, Stamford BA. Smoking and smoking cessation—the relationship between cardiovascular disease and lipoprotein metabolism: a review. *Atherosclerosis*. 2008;201:225-35.
34. Maeda K, Noguchi Y, Fukui T. The effects of cessation from cigarette smoking on the lipid and lipoprotein profiles: a meta-analysis. *Preventive Medicine*. 2003;37:283-90.
35. Matsumoto C, Miedema MD, Ofman P, Gaziano JM, Sesso HD. An expanding knowledge of the mechanisms and effects of alcohol consumption on cardiovascular disease. *Journal of Cardiopulmonary Rehabilitation and Prevention*. 2014;34:159-71.
36. Tolstrup JS, Gronbaek M, Nordestgaard BRG. Alcohol intake, myocardial infarction, biochemical risk factors, and alcohol dehydrogenase genotypes. *Circulation: Cardiovascular Genetics*. 2009;2:507-14.
37. Corella D, Portolés O, Arriola L, Chirlaque MD, Barricarte A, Francés F, et al. Saturated fat intake and alcohol consumption modulate the association between the APOE polymorphism and risk of future coronary heart disease: a nested case-control study in the Spanish EPIC cohort. *The Journal of Nutritional Biochemistry*. 2011;22:487-94.
38. Perissinotto E, Buja A, Maggi S, Enzi G, Manzato E, Scafato E, et al. Alcohol consumption and cardiovascular risk factors in older lifelong wine drinkers: the Italian Longitudinal Study on Aging. *Nutrition, Metabolism and Cardiovascular Diseases*. 2010;20:647-55.
39. Brinton EA. Effects of ethanol intake on lipoproteins. *Current Atherosclerosis Reports*. 2012;14:108-14.
40. Ellison RC, Zhang Y, Qureshi MM, Knox S, Arnett DK, Province MA. Lifestyle determinants of high-density lipoprotein cholesterol: The national heart, lung, and blood institute family heart study. *American Heart Journal*. 2004;147:529-35.
41. Park H, Kim K. Association of alcohol consumption with lipid profile in hypertensive men. *Alcohol and Alcoholism*. 2012;47:282-7.
42. Corrao G, Rubbiati L, Bagnardi V, Zambon A, Poikolainen K. Alcohol and coronary heart disease: a meta-analysis. *Addiction*. 2000;95:1505-23.

- 1  
2  
3  
4  
5  
6  
7  
8  
9  
10  
11  
12  
13  
14  
15  
16  
17  
18  
19  
20  
21  
22  
23  
24  
25  
26  
27  
28  
29  
30  
31  
32  
33  
34  
35  
36  
37  
38  
39  
40  
41  
42  
43  
44  
45  
46  
47  
48  
49  
50  
51  
52  
53  
54  
55  
56  
57  
58  
59  
60
43. Ronksley PE, Brien SE, Turner BJ, Mukamal KJ, Ghali WA. Association of alcohol consumption with selected cardiovascular disease outcomes: a systematic review and meta-analysis. *BMJ*. 2011;342:d671.
44. López EP, Rice C, Weddle DO, Rahill GJ. The relationship among cardiovascular risk factors, diet patterns, alcohol consumption, and ethnicity among women aged 50 years and older. *Journal of the American Dietetic Association*. 2008;108:248-56.
45. Mensink RP. *Effects of Saturated Fatty Acids on Serum Lipids and Lipoproteins: A Systematic Review and Regression Analysis*. Geneva, Switzerland: World Health Organization; 2016.
46. Slentz CA, Houmard JA, Johnson JL, Bateman LA, Tanner CJ, McCartney JS, et al. Inactivity, exercise training and detraining, and plasma lipoproteins. STRRIDE: a randomized, controlled study of exercise intensity and amount. *Journal of Applied Physiology*. 2007;103:432-42.

**Table 1** Distribution of socio-demographic characteristics, behavioral factors and lipid profile of the study population.

|                                                                  | <b>n</b>        | <b>%</b> |
|------------------------------------------------------------------|-----------------|----------|
| <b>Gender (% female)</b>                                         | 181             | 49.9     |
| <b>Age (mean <math>\pm</math> SD, years)</b>                     | 39.2 $\pm$ 15.2 |          |
| 18-29                                                            | 113             | 31.1     |
| 30-39                                                            | 106             | 29.2     |
| 40-49                                                            | 67              | 18.5     |
| 50-59                                                            | 32              | 8.8      |
| $\geq 60$                                                        | 45              | 12.4     |
| <b>Marital Status</b>                                            |                 |          |
| Single                                                           | 128             | 35.3     |
| Married                                                          | 220             | 60.6     |
| Divorced/widowed                                                 | 15              | 4.1      |
| <b>Work Status</b>                                               |                 |          |
| Student or volunteer                                             | 31              | 8.5      |
| Employed                                                         | 190             | 52.3     |
| Does not work/housewife/retired                                  | 142             | 39.1     |
| <b>Educational Level</b>                                         |                 |          |
| Complementary or less                                            | 144             | 39.7     |
| Secondary or technical                                           | 99              | 27.3     |
| University and above                                             | 120             | 33.1     |
| <b>Cigarette Smoking</b>                                         |                 |          |
| Never smoked                                                     | 227             | 62.5     |
| Past smoker                                                      | 15              | 4.2      |
| Current smoker                                                   | 121             | 33.3     |
| <b>Number of cigarettes smoked/day</b>                           |                 |          |
| 0                                                                | 227             | 62.5     |
| 1-19                                                             | 43              | 11.8     |
| 20-39                                                            | 63              | 17.4     |
| $\geq 40$                                                        | 30              | 8.3      |
| <b>Physical activity</b>                                         |                 |          |
| Low-intensity activity                                           | 151             | 41.6     |
| Moderate-intensity activity                                      | 121             | 33.3     |
| High-intensity activity                                          | 88              | 24.2     |
| <b>Alcohol consumption (ever drinker)</b>                        | 144             | 39.7     |
| <b>Total caloric intake (mean <math>\pm</math> SD, Kcal/day)</b> | 2656 $\pm$ 1249 |          |
| <b>Fat intake (% of total energy)<sup>a</sup></b>                | 36.5 $\pm$ 6.89 |          |
| $\geq 30$ <sup>b</sup>                                           | 275             | 81.6     |
| <b>Saturated fat intake (% of total energy)<sup>a</sup></b>      | 11.4 $\pm$ 2.92 |          |
| $\geq 10$ <sup>c</sup>                                           | 224             | 66.5     |
| <b>Carbohydrates intake (% of total energy)<sup>a</sup></b>      | 49.1 $\pm$ 7.03 |          |
| $\geq 55$ <sup>b</sup>                                           | 71              | 21.1     |
| <b>Sugar (% of total energy)<sup>a</sup></b>                     | 5.7 $\pm$ 4.64  |          |
| $\geq 10$ <sup>d</sup>                                           | 56              | 16.6     |
| <b>Proteins intake (% of total energy)<sup>a</sup></b>           | 152 $\pm$ 2.91  |          |
| $< 15$ <sup>b</sup>                                              | 143             | 42.4     |
| <b>Total Cholesterol (mean <math>\pm</math> SD, mg/dl)</b>       | 210 $\pm$ 45    |          |
| % Elevated total cholesterol ( $\geq 200$ mg/dl) <sup>e</sup>    | 201             | 55.4     |
| <b>Triglycerides (mean <math>\pm</math> SD, mg/dl)</b>           | 138 $\pm$ 78    |          |
| % Elevated triglycerides ( $\geq 150$ mg/dl) <sup>e</sup>        | 114             | 31.4     |

|                                            |          |      |
|--------------------------------------------|----------|------|
| <b>VLDL (mean ± SD, mg/dl)</b>             | 27 ± 15  |      |
| % Elevated VLDL (≥30 mg/dl) <sup>e</sup>   | 106      | 29.2 |
| <b>LDL-C (mean ± SD, mg/dl)</b>            | 131 ± 39 |      |
| % Elevated LDL-C (≥130 mg/dl) <sup>e</sup> | 172      | 47.5 |
| <b>HDL-C (mean ± SD, mg/dl)</b>            | 51 ± 14  |      |
| % Reduced HDL-C (≤40 mg/dl) <sup>e</sup>   | 79       | 21.8 |

<sup>a</sup> Dietary variables are based on a sample of 337 subjects owing to missing data

<sup>b</sup> Macronutrient cutoffs are within the Acceptable Macronutrient Distribution Range (AMDR)<sup>25</sup>

<sup>c</sup> Saturated fat cutoff based on the WHO recommendations<sup>26</sup>

<sup>d</sup> Sugar intake cutoff based on the WHO recommendations<sup>27</sup>

<sup>e</sup> Lipid cutoff values based on the Adult Treatment Panel III guidelines<sup>21</sup>; Very Low Density Lipoprotein (VLDL); Low Density Lipoprotein cholesterol (LDL-C); High Density Lipoprotein cholesterol (HDL-C)

For peer review only

**Table 2a** Logistic regression analysis: associations of behavioral risks with total cholesterol (TC) and triglycerides (TG)

|                                |          | TC              |                  |                      | TG              |                  |                      |
|--------------------------------|----------|-----------------|------------------|----------------------|-----------------|------------------|----------------------|
|                                |          | % ≥200<br>mg/dl | Crude<br>OR (CI) | Adjusted*<br>OR (CI) | % ≥150<br>mg/dl | Crude<br>OR (CI) | Adjusted*<br>OR (CI) |
|                                | 0        | 52.0            | 1.00             | 1.00                 | 25.6            | 1.00             | 1.00                 |
| Number of<br>Cigarettes        | 1-19     | 55.8            | 1.17 (0.60-2.25) | 0.85 (0.40-1.77)     | 30.2            | 1.26 (0.62-2.58) | 1.06 (0.48-2.33)     |
|                                | 20-35    | 63.5            | 1.60 (0.90-2.85) | 1.01 (0.51-2.00)     | 38.1            | 1.79 (0.99-3.23) | 1.30 (0.67-2.53)     |
|                                | ≥40      | 63.3            | 1.59 (0.73-3.50) | 1.24 (0.48-3.18)     | 63.3            | 5.03 (2.26-11.2) | 4.27 (1.69-10.77)    |
|                                | p-trend  |                 | 0.070            | 0.783                |                 | <0.001           | 0.010                |
| Physical activity              | High     | 55.7            | 1.00             | 1                    | 25.0            | 1.00             | 1                    |
|                                | Moderate | 56.2            | 1.02 (0.59-1.77) | 0.89 (0.48-1.67)     | 32.2            | 1.43 (0.77-2.64) | 1.64 (0.83-3.25)     |
|                                | Low      | 55.6            | 0.99 (0.59-1.69) | 1.11 (0.31-2.00)     | 35.1            | 1.62 (0.90-2.92) | 1.75 (0.93-3.29)     |
| Alcohol intake                 | No       | 53              | 1                | 1                    | 31.5            | 1                | 1                    |
|                                | Yes      | 59              | 1.28 (0.84-1.96) | 1.52 (0.90-2.55)     | 31.3            | 0.99 (0.63-1.56) | 0.98 (0.57-1.69)     |
| Total fat intake<br>(% energy) | <30      | 54.8            | 1                | 1.00                 | 30.6            | 1                | 1                    |
|                                | ≥30      | 54.9            | 1.03 (0.57-1.74) | 1.15 (0.62-2.13)     | 31.3            | 1.03 (0.57-1.87) | 1.22 (0.34-2.35)     |
| Saturated Fat<br>(% energy)    | <10      | 52.2            | 1                | 1                    | 31              | 1                | 1                    |
|                                | ≥10      | 56.3            | 1.17 (0.75-1.85) | 1.73 (1.02-2.94)     | 31.3            | 1.01 (0.62-1.65) | 1.01 (0.59-1.74)     |
| Carbohydrates<br>(% energy)    | <55      | 53.8            | 1                | 1                    | 30.8            | 1                | 1                    |
|                                | ≥55      | 59.2            | 1.25 (0.73-2.12) | 1.07 (0.59-1.93)     | 32.4            | 1.07 (0.61-1.88) | 0.96 (0.52-1.76)     |
| Sugar intake<br>(% energy)     | <10      | 54.8            | 1                | 1                    | 32              | 1                | 1                    |
|                                | ≥10      | 55.4            | 1.02 (0.57-1.82) | 1.12 (0.59-2.16)     | 26.8            | 0.78 (0.41-1.48) | 0.86 (0.43-1.73)     |
| Protein intake<br>(% energy)   | <15      | 56.6            | 1                | 1                    | 36.4            | 1                | 1                    |
|                                | ≥15      | 53.6            | 0.88 (0.57-1.37) | 0.83 (0.50-1.37)     | 27.3            | 0.66 (0.41-1.05) | 0.79 (0.47-1.32)     |

\*Controlling for age, gender, education, marital status, caloric intake and BMI

**Table 2b** Logistic regression analysis: associations of behavioral risks with very low-density lipoprotein (VLDL), low-density lipoprotein cholesterol (LDL-C) and high-density lipoprotein cholesterol (HDL-C).

|                                |                   | VLDL          |                  |                      | LDL-C          |                  |                      | HDL-C         |                  |                      |
|--------------------------------|-------------------|---------------|------------------|----------------------|----------------|------------------|----------------------|---------------|------------------|----------------------|
|                                |                   | %≥30<br>mg/dl | Crude<br>OR (CI) | Adjusted*<br>OR (CI) | %≥130<br>mg/dl | Crude<br>OR (CI) | Adjusted*<br>OR (CI) | %<40<br>mg/dl | Crude<br>OR (CI) | Adjusted*<br>OR (CI) |
| Number of<br>Cigarettes        | 0                 | 24.2          | 1.00             | 1                    | 43.6           | 1.00             | 1                    | 18.1          | 1.00             | 1.00                 |
|                                | 1-19              | 27.9          | 1.21 (0.58-2.52) | 1.01 (0.45-2.25)     | 53.5           | 1.49 (0.77-2.86) | 1.12 (0.54-2.33)     | 18.6          | 1.04 (0.45-2.40) | 1.01 (0.39-2.63)     |
|                                | 20-39             | 35.5          | 1.72 (0.94-3.14) | 1.27 (0.64-2.51)     | 54.8           | 1.57 (0.89-2.76) | 0.97 (0.50-1.89)     | 28.6          | 1.81 (0.95-3.45) | 1.61 (0.75-3.45)     |
|                                | ≥40               | 56.7          | 4.09 (1.87-8.95) | 3.26 (1.33-8.03)     | 53.3           | 1.48 (0.69-3.17) | 0.96 (0.39-2.40)     | 40.0          | 3.02 (1.35-6.76) | 1.98 (0.77-5.08)     |
|                                | p-trend           |               | <0.001           | 0.030                |                | 0.078            | 0.946                |               | <0.001           | 0.106                |
| Physical<br>activity           | High              | 26.1          | 1.00             | 1                    | 48.9           | 1.00             | 1                    | 27.3          | 1.00             | 1                    |
|                                | Moderate          | 28.9          | 1.15 (0.62-2.13) | 1.27 (0.54-2.52)     | 49.6           | 1.02 (0.59-1.78) | 0.89 (0.48-1.65)     | 19.0          | 0.62 (0.32-1.20) | 0.93 (0.43-2.01)     |
|                                | Low               | 32.0          | 1.33 (0.74-2.39) | 1.44 (0.76-2.71)     | 46.0           | 0.89 (0.53-1.51) | 0.93 (0.52-1.65)     | 21.2          | 0.72 (0.40-1.32) | 0.69 (0.34-1.39)     |
| Alcohol intake                 | No                | 28.3          | 1                | 1                    | 43.4           | 1                | 1                    | 20.5          | 1                | 1                    |
|                                | Yes               | 30.8          | 1.12 (0.71-1.79) | 1.12 (0.65-1.93)     | 53.8           | 1.53 (1.00-2.33) | 1.68 (1.01-2.82)     | 23.6          | 1.19 (0.72-1.98) | 0.98 (0.54-1.78)     |
| Total fat intake<br>(% energy) | <30               | 29.0          | 1                | 1                    | 45.2           | 1                | 1                    | 25.8          | 1                | 1                    |
|                                | ≥ 30              | 28.8          | 0.99 (0.54-1.82) | 1.15 (0.59-2.22)     | 46.7           | 1.06 (0.61-1.85) | 1.26 (0.69-2.33)     | 21.8          | 0.80 (0.42-1.52) | 0.81 (0.39-1.65)     |
| Saturated Fat<br>(% energy)    | <10               | 29.2          | 1                | 1                    | 44.2           | 1                | 1                    | 20.4          | 1                | 1                    |
|                                | ≥ 10 <sup>s</sup> | 28.7          | 0.98 (0.59-1.61) | 0.96 (0.56-1.66)     | 47.5           | 1.15 (0.72-1.80) | 1.73 (1.02-2.93)     | 23.7          | 1.21 (0.70-2.16) | 1.16 (0.62-2.17)     |
| Carbohydrates<br>(% energy)    | <55               | 28.7          | 1                | 1                    | 45.7           | 1                | 1                    | 22.2          | 1                | 1                    |
|                                | ≥55               | 29.6          | 1.04 (0.59-1.86) | 0.96 (0.52-1.79)     | 49.3           | 1.16 (0.68-1.95) | 0.93 (0.52-1.67)     | 23.9          | 1.10 (0.60-2.05) | 1.18 (0.59-2.36)     |
| Sugar intake<br>(% energy)     | <10               | 29.6          | 1                | 1                    | 47.1           | 1                | 1                    | 23.8          | 1                | 1                    |
|                                | ≥10               | 25.0          | 0.79 (0.41-1.53) | 0.89 (0.44-1.82)     | 42.9           | 0.84 (0.47-1.50) | 0.89 (0.47-1.71)     | 16.1          | 0.61 (0.28-1.31) | 0.62 (0.26-1.45)     |
| Protein intake<br>(% energy)   | <15               | 32.9          | 1                | 1                    | 48.3           | 1                | 1                    | 21            | 1                | 1                    |
|                                | ≥15               | 25.9          | 0.71(0.44-1.15)  | 0.85 (0.50-1.44)     | 45.1           | 0.88 (0.57-1.36) | 0.75 (0.46-1.24)     | 23.7          | 1.17 (0.59-1.97) | 1.49 (0.82-2.72)     |

\*Controlling for age, gender, education, marital status, caloric intake and BMI

# BMJ Open

## Prevalence and associations of behavioral risk factors with blood lipids profile in Lebanese adults: findings from the WHO STEPwise NCD cross-sectional Survey

|                                 |                                                                                                                                                                                                                                                                                                                                                                                                                                                                                                  |
|---------------------------------|--------------------------------------------------------------------------------------------------------------------------------------------------------------------------------------------------------------------------------------------------------------------------------------------------------------------------------------------------------------------------------------------------------------------------------------------------------------------------------------------------|
| Journal:                        | <i>BMJ Open</i>                                                                                                                                                                                                                                                                                                                                                                                                                                                                                  |
| Manuscript ID                   | bmjopen-2018-026148.R3                                                                                                                                                                                                                                                                                                                                                                                                                                                                           |
| Article Type:                   | Research                                                                                                                                                                                                                                                                                                                                                                                                                                                                                         |
| Date Submitted by the Author:   | 04-Jul-2019                                                                                                                                                                                                                                                                                                                                                                                                                                                                                      |
| Complete List of Authors:       | Mansour, Megali; American University of Beirut Faculty of Health Sciences, EPHD<br>Tamim, Hani; American University of Beirut, Biostatistics Unit, Clinical Research Institute<br>Nasreddine, Lara; American University of Beirut<br>EL Khoury, Christelle; Tufts University School of Medicine<br>Hwalla, Nahla; American University of Beirut<br>Chaaya, Monique; American University of Beirut<br>Farhat, Antoine ; Notre Dame University<br>Sibai, Abla; American University of Beirut, EPHD |
| <b>Primary Subject Heading</b>: | Public health                                                                                                                                                                                                                                                                                                                                                                                                                                                                                    |
| Secondary Subject Heading:      | Epidemiology, Nutrition and metabolism, Smoking and tobacco, Public health                                                                                                                                                                                                                                                                                                                                                                                                                       |
| Keywords:                       | PUBLIC HEALTH, EPIDEMIOLOGY, Cigarette Smoking, Blood lipids                                                                                                                                                                                                                                                                                                                                                                                                                                     |
|                                 |                                                                                                                                                                                                                                                                                                                                                                                                                                                                                                  |

SCHOLARONE™  
Manuscripts

1  
2  
3 **1 Prevalence and associations of behavioral risk factors with blood lipids profile in**  
4  
5 **2 Lebanese adults: findings from the WHO STEPwise NCD cross-sectional Survey**  
6  
7

8 3

9 4 Magali Mansour<sup>1†</sup>, Hani Tamim<sup>2†</sup>, Lara Nasreddine<sup>3</sup>, Christelle El Khoury<sup>4</sup>, Nahla Hwalla<sup>3</sup>,  
10 5 Monique Chaaya<sup>1</sup>, Antoine Farhat<sup>5</sup>, Abla M. Sibai<sup>1\*</sup>  
11  
12 6

13  
14 **7 Author affiliations**

15 8 <sup>1</sup> Department of Epidemiology and Population Health, Faculty of Health Sciences, American  
16 9 University of Beirut, P.O.Box 11-0236, Riad El-Solh, Beirut 1107 2020, Lebanon

17 10 <sup>2</sup> Department of Internal Medicine , American University of Beirut-Medical Center, P.O.Box  
18 11 11-0236, Riad El-Solh, Beirut 1107 2020, Lebanon

19 12 † Equal Contribution

20 13 <sup>3</sup>Faculty of Agricultural and Food Sciences, American University of Beirut, P.O.Box 11-  
21 14 0236, Riad El-Solh, Beirut 1107 2020, Lebanon

22 15 <sup>4</sup>School of Medicine Department of Public Health, Tufts University,136 Harrison Avenue,  
23 16 Boston, MA 02111, US

24 17 <sup>5</sup>Faculty of Nursing and Health Sciences, Notre Dame University, Lebanon  
25 18  
26 19  
27 20

28  
29  
30  
31  
32  
33  
34  
35 **21 \*Corresponding author:**

36 **22 Abla M. Sibai**

37  
38  
39 23  
40 24 Epidemiology and Population Health  
41 25 Faculty of Health Sciences  
42 26 American University of Beirut  
43 27 PO Box 11-0236  
44 28 Beirut-Lebanon  
45 29 Tel: +961-1-350000 ext. 4647  
46 30 Fax: +961-1-744470  
47 31 Email: am00@aub.edu.lb  
48  
49 32  
50  
51 33  
52  
53 34  
54  
55  
56  
57  
58  
59  
60

1  
2  
3 1 **Keywords:** Cardiovascular disease, smoking, alcohol consumption, physical inactivity,  
4  
5 2 dietary intake, blood lipids, Lebanon  
6  
7  
8 3  
9

10 4 **Word count (excluding title page, abstract, references, and tables):** 3143  
11  
12 5  
13  
14  
15  
16  
17  
18  
19  
20  
21  
22  
23  
24  
25  
26  
27  
28  
29  
30  
31  
32  
33  
34  
35  
36  
37  
38  
39  
40  
41  
42  
43  
44  
45  
46  
47  
48  
49  
50  
51  
52  
53  
54  
55  
56  
57  
58  
59  
60

For peer review only

## 1 **Abstract**

2 **Objective:** To examine associations of behavioral risk factors, namely cigarette smoking,  
3 physical activity, dietary intakes and alcohol consumption, with blood lipids profile.

4 **Design and participants:** Data drawn from a cross-sectional study involving participants  
5 aged 18 years and over (n = 363) from the nationwide WHO STEPwise Nutrition and Non-  
6 communicable Disease Risk Factor survey in Lebanon.

7 **Measures:** Demographic characteristics, behaviors and medical history were obtained from  
8 participants by questionnaire. Dietary assessment was performed using a 61-item culture-  
9 specific food frequency questionnaire that measured food intake over the past year. Lipid  
10 levels were measured by analysis of fasting blood samples (serum total cholesterol-TC,  
11 triglycerides-TG, very low-density lipoprotein-VLDL, low-density lipoprotein cholesterol-  
12 LDL-C and high-density lipoprotein cholesterol-HDL-C).

13 **Results:** Current cigarette smoking, alcohol consumption and low physical activity were  
14 prevalent among 33.3%, 39.7%, and 41.6% of the sample, respectively. The contributions of  
15 fat and saturated fat to daily energy intake were high, estimated at 36.5% and 11.4%,  
16 respectively. Abnormal levels of TC, TG, VLDL, LDL-C, and HDL-C were observed for  
17 55.4%, 31.4%, 29.2%, 47.5% and 21.8% of participants, respectively. Adjusting for potential  
18 confounders, cigarette smoking was positively associated with higher odds of TG and VLDL  
19 (OR=4.27; 95% CI 1.69-10.77; and 3.26; 95% CI 1.33-8.03, respectively) with a significant  
20 dose-response relationship (p-value for trend=0.010 and 0.030, respectively). Alcohol  
21 drinking and high saturated fat intake ( $\geq 10\%$  energy intake) were associated with higher odds  
22 of LDL-C (OR=1.68; 95% CI: 1.01-2.82 and OR= 1.73; 95% CI: 1.02-2.93). Physical  
23 activity did not associate significantly with any blood lipid parameter.

24 **Conclusion:** The demonstrated positive associations between smoking, alcohol drinking and  
25 high saturated fat intake with adverse lipoprotein levels lay further evidence for clinical

1  
2  
3 1 practitioners, public health professionals and dietitians in the development of preventive  
4  
5 2 strategies among subjects with high risk of CVDs in Lebanon and other neighboring  
6  
7 3 countries with similar epidemiological profile.  
8  
9  
10 4  
11  
12 5  
13  
14  
15  
16  
17  
18  
19  
20  
21  
22  
23  
24  
25  
26  
27  
28  
29  
30  
31  
32  
33  
34  
35  
36  
37  
38  
39  
40  
41  
42  
43  
44  
45  
46  
47  
48  
49  
50  
51  
52  
53  
54  
55  
56  
57  
58  
59  
60

For peer review only

## 1 **Strengths and limitations**

- 2 • A nationwide survey administered in Lebanon, following the WHO STEPwise  
3 approach to surveillance guidelines, thus allowing for comparison with international  
4 literature.
- 5 • Low response rate (27.3%) for those who consented and gave fasting blood samples.  
6 Yet, differences between responders and non-responders were not significant on a  
7 number of socio-demographic characteristics.
- 8 • Whilst data on smoking, physical activity and dietary intakes were sufficiently  
9 detailed, measures of exposure to alcohol consumption lacked information on  
10 intensity and type and may be prone to misclassification bias.
- 11 • Attention to associations between behavioral factors and dietary intakes with  
12 intermediary metabolic conditions along the causal pathway for CVD informs work  
13 towards development of tailored preventive strategies for high risk individuals.

## 1 Introduction

2 The prevalence of cardiovascular diseases (CVD) is growing worldwide, and has reached  
3 epidemic levels, affecting both developed and developing countries.<sup>1</sup> The Middle East and  
4 North Africa countries represent a region which is now facing a fast rate of development and  
5 urbanization, with rates of chronic diseases increasing at an alarming rate and exceeding at  
6 times those of developed countries.<sup>2</sup> In Lebanon, a small middle-income country at the  
7 Eastern Mediterranean shore, data from the World Health Organization (WHO) indicate that  
8 the proportional mortality from CVD alone is 45%, making it the highest among all non-  
9 communicable diseases (NCDs).<sup>3</sup> With a population estimate of around 4.2 million and a  
10 Gross Domestic Product (GDP) of close to 8,520 US Dollars per capita, Lebanon is  
11 characterized by a high urbanization rate (87%), a growing trend towards survival in later  
12 life, coupled with westernization and modernization in diet and lifestyle and higher uptake of  
13 NCD risk factors.<sup>4</sup>

14 The primary goal in the prevention and management of CVD is to identify and modify the  
15 underlying risk behaviors that are amenable to intervention, namely, cigarette smoking,  
16 physical inactivity, dietary intakes and alcohol consumption. Associations between these  
17 factors and CVD risk through their effect on blood lipid levels have been widely examined in  
18 the western literature. Studies have shown that smokers are 2-4 times more at risk of  
19 developing heart disease than nonsmokers<sup>5</sup> and the number of cigarettes smoked/day  
20 independently predicts higher levels of Total Cholesterol (TC), Low Density Lipoprotein-  
21 Cholesterol (LDL-C), and Triglycerides (TG).<sup>6</sup> Also, smoking cessation has been shown to  
22 improve High Density Lipoprotein-Cholesterol (HDL-C) levels.<sup>7</sup> Cigarette smoking is  
23 described as a strong inflammation mediator and a key promoter in the atherosclerotic  
24 process. Similarly, the anti-inflammatory effect of frequent physical activity has been noted  
25 to be the reason behind reduced heart disease risk among physically active individuals.<sup>8</sup>

1  
2  
3 1 Regular physical activity with weight reduction has a large beneficial impact on the  
4  
5 2 lipoproteins profile of adult men and women,<sup>9</sup> by increasing plasma volume, decreasing  
6  
7 3 blood thickness, and thus reducing LDL-C concentrations.<sup>10</sup> Also, systematic reviews and  
8  
9 4 meta-analysis of intervention studies have shown that heavy alcohol drinking results in an  
10  
11 5 elevation in triglyceride levels, while moderate consumption increases circulating levels of  
12  
13 6 HDL-C.<sup>11</sup> Similarly, diet is recognized as a modifiable risk factor that can make a  
14  
15 7 substantial contribution to the risk of CVD.<sup>12 13</sup> Energy intake, the types of fatty acids  
16  
17 8 consumed and the level of sugar ingestion may impact the lipid and cardiometabolic  
18  
19 9 profile.<sup>14</sup> The 2017 Presidential Advisory from the American Heart Association indicated that  
20  
21 10 replacement of saturated fat with unsaturated fatty acids decreases LDL-C levels and CVD  
22  
23 11 risk, while replacing it with refined carbohydrates and sugar, yields no significant benefits to  
24  
25 12 cardiovascular health.<sup>14</sup>

26  
27 13 Much of the above evidence comes from studies conducted in North American and  
28  
29 14 European countries and to a lesser extent from the Far East, mostly among Japanese and  
30  
31 15 Korean population. Arab populations including the Lebanese have quite different risk  
32  
33 16 behaviors, varied dietary habits and risk profile,<sup>15</sup> and studies evaluating the association  
34  
35 17 between behaviors and intermediary variables along the causal pathway of CVD  
36  
37 18 including lipid levels remain scarce in the region. Compared with other neighboring  
38  
39 19 countries, Lebanon was shown to have one of the highest prevalence estimates of  
40  
41 20 metabolic syndrome,<sup>16</sup> and has been witnessing high rates of smoking, among both  
42  
43 21 adult men and women aged 18 years and over (42.9% and 27.5%, respectively).<sup>17</sup> Using  
44  
45 22 data from a nationwide population-based survey of Lebanese adults, this study aims to  
46  
47 23 examine the relation between behavioral risk factors including cigarette smoking,  
48  
49 24 physical activity, dietary intakes and alcohol consumption with serum lipids and  
50  
51 25 lipoproteins, while taking into account several potential confounding factors. Findings  
52  
53  
54  
55  
56  
57  
58  
59  
60

1 from this study inform prevention strategies among subjects with high risk of CVD in  
2 the country.

3

## 4 **Methods**

### 5 **Study design and participants**

6 The data presented in this study are derived from the WHO Nutrition and Non-  
7 Communicable Diseases Risk Factor (NNCD-RF) cross-sectional household survey  
8 conducted in Lebanon in 2009.<sup>18</sup> Using multi-stage stratified cluster study design, the  
9 sampling was based on the age-sex distribution of the Lebanese population as provided by the  
10 Central Administration for Statistics. One adult was randomly selected from each household  
11 using Kish methodology.<sup>19</sup> Pregnant and lactating women and individuals with mental  
12 disabilities were excluded. With a non-response rate of 10% at the individual level, this  
13 yielded a sample of 2668 survey participants aged 18 years and above. Those free from  
14 known history of hyperlipidemia and diabetes in the first phase of the study (n = 1,331) were  
15 approached to undergo a biochemical assessment, of which 363 provided written consent and  
16 gave fasting blood samples. Further details on the design and sample of the survey are  
17 published elsewhere.<sup>4</sup> The study protocol was approved by the Institutional Review Board of  
18 the American University of Beirut (AUB), and informed consent was taken from all  
19 participants.

### 20 **Data collection**

21 The data collection procedure followed the WHO STEPwise approach to Surveillance,<sup>20</sup> and  
22 included the following three steps: Step 1 Questionnaire, whereby information about socio-  
23 demographic characteristics, NCDs and NCD risk factors, including dietary intake, were  
24 collected through face-to-face interviews; Step 2 in which anthropometric and blood pressure

1 measurements were taken using standardized techniques and calibrated equipment; and  
2  
3 finally, Step 3 in which biochemical analysis for assessment of the blood lipid profile was  
4  
5 performed on blood samples collected after an overnight fast of at least 8 hours. Serum was  
6  
7 centrifuged on site and shipped on dry ice to the AUB Laboratory.  
8  
9  
10  
11  
12  
13

## 14 **Measures of blood lipids**

15  
16 Levels of blood lipids including TC, TG, very low density lipoprotein (VLDL), LDL-C and  
17  
18 HDL-C were analyzed using the Vitros 350 analyzer, an enzymatic spectrophotometric  
19  
20 technique. The inter-assay variation of measurements did not exceed 4%. Quality control was  
21  
22 performed within each run using standard performance verifier solutions provided by Ortho-  
23  
24 Clinical Diagnostics. Analyses were conducted in duplicates, and the average value was  
25  
26 utilized in the analysis. Based on the Adult Treatment Panel III guidelines,<sup>21</sup> the cutoff points  
27  
28 used for the definition of risk levels of TC, TG, VLDL, LDL-C and HDL-C were  $\geq 200$ ,  
29  
30  $\geq 150$ ,  $\geq 30$ ,  $\geq 130$  and  $\leq 40$  mg/dl, respectively.  
31  
32  
33  
34  
35  
36  
37

## 38 **Behavioral risk factors and other measures**

39  
40 Behavioral risk factors examined in this study included cigarette smoking, physical activity,  
41  
42 and alcohol consumption. Cigarette smoking status (never, past and current) and intensity  
43  
44 (number of cigarettes smoked/day) were assessed. Intensity was later categorized into three  
45  
46 levels according to number of cigarettes/day (1 to 19, 20 to 39 and  $\geq 40$ ). The short version of  
47  
48 the International Physical Activity Questionnaire was used to assess physical activity among  
49  
50 participants.<sup>22</sup> Three categories of physical activity (low, moderate, and high) were assigned  
51  
52 based on METs-min/week (MET-min being the product of the resting metabolic rate for an  
53  
54 activity and the number of minutes taken to perform it). Alcohol-related behavior was  
55  
56 assessed as a dichotomous variable (ever vs never). Dietary assessment was performed using  
57  
58  
59  
60

1 a 61-item culture-specific food frequency questionnaire that measured food intake over the  
2 past year.<sup>4, 15</sup> Intakes of energy and macronutrients were estimated using the food  
3 composition database of the Nutritionist IV software, and the food composition table for local  
4 and traditional Middle-Eastern foods.<sup>23,24</sup> Intakes of carbohydrates, fat and protein were  
5 compared to cut-offs within the Acceptable Macronutrient Distribution Range,<sup>25</sup> and intakes  
6 of saturated fat and sugar were compared to the recommendations of the WHO.<sup>26, 27</sup>

7  
8 Covariates of interest included total daily caloric intake and body mass index (BMI),  
9 measured as the ratio of weight (kilograms) to the square of height (meters). In addition,  
10 gender, age (18-29, 30-39, 40-49, 50-59, and  $\geq 60$ ), marital status (single, married,  
11 divorced/widowed), education level (complementary or less, secondary/technical, university  
12 and above), and occupational status (student/volunteer, working, does not  
13 work/housewife/retired) were considered as potential covariates.

### 15 **Patient and Public Involvement**

16 This study is based on secondary data analyses. The original data collection tool was adapted  
17 from the WHO STEPwise approach to NCD risk factor surveillance,<sup>20</sup> that did not directly  
18 involve patients or the public in outcome development or conduct of the study. However, we  
19 have been engaging with stakeholders to disseminate the findings on NCD risk factors,  
20 including tobacco consumption and dietary intakes, and on associations with various health-  
21 related outcomes to the public at large.

### 23 **Statistical analysis**

24 Means, standard deviations (SD) and frequencies were used to describe the various socio-  
25 demographic, behavioral, nutritional and clinical characteristics of the participants. The

1 associations between each of the risk factors and levels of the different blood lipids were  
2 examined using multiple logistic regression analysis. Unadjusted and adjusted odds ratios  
3 (ORs) and their 95% confidence intervals (CIs) controlling for age, gender, education, marital  
4 status, caloric intake and BMI were estimated. Test for trend with increasing number of daily  
5 amount of cigarettes smoked was also conducted, and a two-sided p-value < 0.05 was  
6 considered significant. The Statistical Package for the Social Sciences 22.0.1 (SPSS Inc.,  
7 Chicago, IL, USA) was used for all computations.

## 10 Results

11 The socio-demographic and health-related characteristics of the study sample are summarized  
12 in Table 1. The sample was equally divided by gender (49.9% females and 50.1% males),  
13 with a mean age of  $39.2 \pm 15.2$  years (range 18 to 92 years). The majority were married  
14 (60.6%), and close to half of the participants were employed (52.3%) at the time of the study,  
15 with a high percentage having less than complementary education (39.7%). Ever smokers  
16 constituted 37.5% of the sample, 41.6% were classified as being engaged in low-intensity  
17 physical activity, and 39.7% reported ever alcohol drinkers. Average daily energy intake was  
18 estimated at  $2656 \pm 1249$  Kcal/day, with 36.5% of caloric intake from fat, 11.4% from  
19 saturated fat, 49.1% from carbohydrates, 5.7% from sugar, and 15.2% from protein.  
20 Abnormal levels of TC, TG, VLDL, LDL-C, and HDL-C were observed for 55.4%, 31.4%,  
21 29.2%, 47.5% and 21.8% of the participants, respectively.

23 Insert table 1 around here

1  
2  
3 1 Tables 2a and 2b show the unadjusted and adjusted ORs for the association between  
4  
5 2 behavioral risk factors and dietary variables with blood lipids levels. Associations with  
6  
7 3 cigarette smoking were positive for most outcomes but significant for those consuming more  
8  
9 4 than 40 cigarettes/day, compared to non-smokers, in the case of TG (unadjusted OR = 5.03)  
10  
11 5 and VLDL (OR = 4.09) and HDL-C OR = 3.02). Adjusting for potential confounders, the  
12  
13 6 associations maintained statistical significance for TG and VLDL, with an adjusted OR of  
14  
15 7 4.27 (95% CI 1.69- 10.77) and 3.26 (95% CI 1.33-8.03), respectively. Results showed a dose-  
16  
17 8 response relationship with increasing number of cigarettes consumed for (p-value for trend =  
18  
19 9 0.010 and 0.030, respectively). In addition, a statistically significant association was observed  
20  
21 10 between ever alcohol drinking and LDL-C (OR=1.53). This association retained statistical  
22  
23 11 significance even after adjustment for potential confounders with an OR of 1.68 (95% CI  
24  
25 12 1.01-2.82). Out of all the dietary variables examined, only saturated fat was associated with  
26  
27 13 blood lipids, namely TC and LDL-C, with an adjusted OR of 1.73 for both lipid abnormalities  
28  
29 14 (95% CI 1.02-2.94 and 1.02-2.93, respectively). Physical activity was not associated with any  
30  
31 15 of the blood lipid parameters.  
32  
33  
34  
35  
36  
37  
38  
39  
40  
41  
42  
43  
44  
45  
46  
47  
48  
49

17 Insert tables 2a and 2b around here

## 20 Discussion

21 Our results showed that heavy cigarette smoking is associated with increased levels of TG  
22 and VLDL, with findings showing significant dose-response relationships with increasing  
23 number of cigarettes smoked per day. The study also showed that alcohol drinking and high  
24 saturated fat intake are significantly associated with higher levels of LDL-C. However, there  
25 were no consistent associations between physical activity and fasting blood lipids profile. To  
60

1  
2  
3 1 our knowledge, this is the first study in Lebanon to explore these associations, based on  
4  
5 2 objectively measured lipid parameters and using standardized laboratory techniques and  
6  
7 3 tools, while taking into consideration the effect of potential confounders.  
8  
9

10  
11 4 There are strong indicators in the literature that the deleterious effect of cigarette smoking on  
12  
13 5 heart disease and atherosclerosis is partially explained by the effect of smoking on the  
14  
15 6 concentration of blood lipids and lipoproteins. Our study confirms the results of earlier cross-  
16  
17 7 sectional studies showing that the association between smoking and lipoproteins are observed  
18  
19 8 in the levels of TG, VLDL and HDL-C, <sup>6, 28, 29</sup> with the impact on lipid levels increasing with  
20  
21 9 increase in the number of cigarettes smoked/day in a dose dependent relationship. <sup>30, 31</sup> Our  
22  
23 10 observation of the largest effect of cigarette smoking on lipid parameters being seen in those  
24  
25 11 who smoked more than two packs a day is also consistent with Chen et al. study comprising  
26  
27 12 of 1,164 men in Taiwan. <sup>32</sup> One popular mechanism by which smoking affects lipoproteins is  
28  
29 13 that cigarette particulate matter alters catecholamine release—and thus free fatty acid release,  
30  
31 14 which in turn contributes to the accumulation of the LDL-C concentrations and to lower  
32  
33 15 levels of HDL-C in the blood. <sup>33</sup> The association between cigarette smoking and the increase  
34  
35 16 in TG can also be explained by the decrease in the activity of the lipoprotein lipase among  
36  
37 17 smokers thus disrupting lipid and lipoprotein metabolism. Furthermore, smoking cessation  
38  
39 18 was found to improve lipid and lipoprotein levels in observational studies and randomized  
40  
41 19 clinical trials. <sup>7, 34</sup> Taken together, the totality of evidence from these studies and our data-  
42  
43 20 including consistency upon replication across various studies, the dose-response relationship,  
44  
45 21 the magnitude and significance of association, biological plausibility as well as effects of  
46  
47 22 smoking cessation on lipoprotein levels, supports a strong relationship between smoking and  
48  
49 23 lipid profiles.  
50  
51  
52  
53  
54  
55  
56  
57  
58  
59  
60

1  
2  
3 1 Our study showed that alcohol drinking was associated with higher LDL-C levels in  
4  
5 2 Lebanese adults but was not associated with other lipid parameters. Available evidence on  
6  
7 3 the impact of alcohol on LDL-C is conflicting with recent studies suggesting that the  
8  
9 4 association of alcohol and LDL-C levels may be population-specific.<sup>35</sup> For instance, studies  
10  
11 5 conducted amongst Danish adults reported an inverse association between alcohol intake and  
12  
13 6 LDL-C,<sup>36</sup> while studies conducted in Spanish and Italian populations found that higher  
14  
15 7 alcohol consumption was associated with increased LDL-C.<sup>37,38</sup> According to a review by  
16  
17 8 Brinton (2012), these inconsistent findings on the association between alcohol intake and  
18  
19 9 LDL-C, may be explained by allele-specific genetic effects, such as the Apo E4 and Apo A5  
20  
21 10 genes.<sup>39</sup> In our study, alcohol drinking was not associated with HDL-C levels. Findings on  
22  
23 11 the relationship between alcohol and HDL-C have in fact been less consistent in the  
24  
25 12 literature, with some but not all showing an effect on higher HDL-C levels.<sup>40,41</sup> Indeed, the  
26  
27 13 effect of alcohol on CVD including coronary artery disease, stroke and myocardial infarction  
28  
29 14 appears to be biphasic showing a J or U-shaped relationship based on the amount of alcohol  
30  
31 15 consumed,<sup>41,42</sup> with lower CVD mortality risks by light to moderate alcohol consumption  
32  
33 16 and increased risk by heavy alcohol intake.<sup>43</sup> The discrepancy between our results with those  
34  
35 17 in the literature may be due to differences in race/ethnicity and genetic variations.<sup>44</sup>  
36  
37 18 Alternatively, it may be due to the definition of alcohol exposure adopted in our study which  
38  
39 19 was based on a dichotomous variable (ever vs never), and thus does not capture alcohol  
40  
41 20 intake in terms of frequency, intensity, types and pattern of alcohol consumed. It is important  
42  
43 21 to also acknowledge that alcohol consumption may be subject to reporting bias in the  
44  
45 22 Lebanese society due to cultural or religious norms. The observed association between  
46  
47 23 alcohol and lipid profile should therefore be interpreted with caution, as it may have been the  
48  
49 24 artifact of other social or lifestyle factors that were not measured in our study.  
50  
51  
52  
53  
54  
55  
56  
57  
58  
59  
60

1  
2  
3 1 Dietary intakes are amongst the modifiable risk factors that may modulate plasma lipids and  
4  
5 2 the risk of CVD. In our study, saturated fat was the only dietary factor that was significantly  
6  
7 3 associated with lipid parameters, and specifically with TC and LDL-C. Despite the  
8  
9  
10 4 increasing controversy around the relationship between saturated fat and blood cholesterol  
11  
12 5 levels, an increasing body of evidence highlights the strong atherogenicity of saturated fatty  
13  
14 6 acids through their impact on LDL-C.<sup>14</sup> A systematic review and meta-regression analysis  
15  
16 7 published in 2016 showed that a decrease in saturated fats of 1% of daily energy intake  
17  
18 8 coupled with an increase of 1% in polyunsaturated fat, lowered LDL cholesterol by 2.1  
19  
20 9 mg/dL.<sup>45</sup> In 2017, a Presidential Advisory from the American Heart Association (AHA)  
21  
22 10 concluded that available evidence strengthens the long-standing AHA recommendations to  
23  
24 11 decrease saturated fat intake and replace it with unsaturated fats. The AHA Advisory  
25  
26 12 highlighted that the shift from saturated to unsaturated fats should occur in the context of an  
27  
28 13 overall healthful dietary pattern such as the DASH or Mediterranean patterns.<sup>14</sup>  
29  
30  
31  
32  
33  
34 14 In our study, physical activity did not appear to be associated with lipid parameters. The  
35  
36 15 literature suggests that physical activity increases the level of HDL-C and has beneficial  
37  
38 16 effects on lipoprotein particle size and number.<sup>46</sup> Also, moderate intensity exercise is known  
39  
40 17 to have a more favorable effect on blood lipids since it allows the use of lipids as a fuel  
41  
42 18 source which implies an increase in the uptake and oxidation of the lipids in the skeletal  
43  
44 19 muscle.<sup>46</sup>  
45  
46  
47  
48  
49 20 Some other limitations should be taken into consideration when interpreting the results of our  
50  
51 21 study. Because the study used a cross-sectional design, findings only imply associations and  
52  
53 22 causal relationships cannot be established. The proportion of participants who gave fasting  
54  
55 23 blood samples (of at least 8 hours) was relatively small (27.3%); however, responders were  
56  
57 24 comparable to non-responders on a number of socio-demographic characteristics except for  
58  
59  
60

1 marital status (61% of responders vs. 50% of non-responders were married). Also, we had  
2 earlier documented comparable dietary data between respondents and non-respondents based  
3 on factor loading matrices on patterns of food groups intake.<sup>4</sup> As mentioned earlier,  
4 measures of exposure were self-reported which can introduce some misclassification error.  
5 This may have been particularly problematic in the case of alcohol consumption, given that  
6 our definition based on a dichotomous variable of “ever” vs “never” does not allow for the  
7 assessment of drinking frequency and patterns or the type of alcohol consumed. In contrast,  
8 our measurement of cigarette smoking and physical activity were more detailed and reliable.  
9 Information on cigarette smoking in our study included the amount of cigarettes smoked and  
10 the standardized IPAQ was used to assess physical activity.

11 To conclude, our results suggest that smoking, alcohol drinking and high saturated fat are  
12 associated with adverse levels of lipoprotein, among Lebanese men and women. There is  
13 enough evidence in the literature indicating the role of lipoproteins in atherogenesis and that  
14 controlling for blood lipid levels decreases the risk of heart and many other chronic diseases.  
15 Our findings lay further evidence for clinical practitioners, public health professionals and  
16 dieticians regarding the potential benefits of lifestyle and dietary modifications in their  
17 pursuit to curb the burden of hyperlipidemia and CVD at the individual and population level.  
18 The overall high rate of smoking behavior in Lebanon among both men and women, coupled  
19 with the shift in dietary patterns towards high fat energy dense foods,<sup>7, 15</sup> are likely to  
20 adversely impact on the healthcare bill in the country. Further studies with larger sample size  
21 that examine the association of combination patterns of poor lifestyle factors on lipid profile  
22 among Lebanese adults are warranted.

**Contributors**

MM conducted initial analyses and wrote the first draft, in partial fulfillment of her MSc in Epidemiology. HT supervised the conduct of analyses and contributed to the write-up. LN conducted the dietary analyses and contributed to the write-up and revisions. CK, NH, MC and AF provided statistical advice and contributed to the paper revisions. AMS coordinated original study conduct, conceived and finalized the analyses, and contributed substantially to the write-up and revisions. All authors read and approved the final version of the manuscript.

**Funding statement**

The original study conduct was funded by the World Health Organization (WHO) - Lebanon. However, no funds were available for this secondary analysis.

**Data sharing statement**

The dataset was available for all authors of the study and will be available for other non-commercial researchers upon request.

**Declaration of conflicting interests**

The authors declare that there is no conflict of interest.

1  
2  
3 **1 REFERENCES**  
4

- 5  
6 2 1. Roth GA, Johnson C, Abajobir A, Abd-Allah F, Abera SF, Abyu G et al. Global,  
7 3 Regional, and National Burden of Cardiovascular Diseases for 10 Causes, 1990 to  
8 4 2015. *Journal of the American College of Cardiology*. 2017;7 0:1-25.
- 9 5 2. Sibai AM, Nasreddine L, Mokdad AH, Adra N, Tabet M, Hwalla N. Nutrition  
10 6 transition and cardiovascular disease risk factors in Middle East and North Africa  
11 7 countries: reviewing the evidence. *Annals of Nutrition and Metabolism*. 2010;57:193-  
12 8 203.
- 13 9 3. World Health Organization. Non-communicable Diseases Country Profiles 2014.
- 14 10 4. Naja F, Nasreddine L, Itani L, Adra N, Sibai A, Hwalla N. Association between  
15 11 dietary patterns and the risk of metabolic syndrome among Lebanese adults. *European*  
16 12 *Journal of Nutrition*. 2013;52:97-105.
- 17 13 5. US Department of Health and Human Services. The health consequences of  
18 14 smoking—50 years of progress: a report of the Surgeon General. Atlanta (GA): The  
19 15 health consequences of smoking—50 years of progress: a report of the Surgeon  
20 16 General: Centers for Disease Control and Prevention (US), National Center for  
21 17 Chronic Disease Prevention and Health Promotion, Office on Smoking and Health;  
22 18 2014.
- 23 19 6. Gossett LK, Johnson HM, Piper ME, Fiore MC, Baker TB, Stein JH. Smoking  
24 20 intensity and lipoprotein abnormalities in active smokers. *Journal of Clinical*  
25 21 *Lipidology*. 2009;3:372-8.
- 26 22 7. Gepner AD, Piper ME, Johnson HM, Fiore MC, Baker TB, Stein JH. Effects of  
27 23 smoking and smoking cessation on lipids and lipoproteins: outcomes from a  
28 24 randomized clinical trial. *American Heart Journal*. 2011;161:145-51.
- 29 25 8. Abramson JL, Vaccarino V. Relationship between physical activity and inflammation  
30 26 among apparently healthy middle-aged and older US adults. *Archives of Internal*  
31 27 *Medicine*. 2002;162:1286-92.
- 32 28 9. Barengo NC, Kastarinen M, Lakka T, Nissinen A, Tuomilehto J. Different forms of  
33 29 physical activity and cardiovascular risk factors among 24–64-year-old men and  
34 30 women in Finland. *European Journal of Cardiovascular Prevention & Rehabilitation*.  
35 31 2006;13:51-9.
- 36 32 10. Thompson PD, Crouse SF, Goodpaster B, Kelley D, Moyna N, Pescatello L. The  
37 33 acute versus the chronic response to exercise. *Medicine and Science in Sports and*  
38 34 *Exercise*. 2001;33:S438-45.
- 39 35 11. Brien SE, Ronksley PE, Turner BJ, Mukamal KJ, Ghali WA. Effect of alcohol  
40 36 consumption on biological markers associated with risk of coronary heart disease:  
41 37 systematic review and meta-analysis of interventional studies. *BMJ*. 2011;342:d636.
- 42 38 12. Wang Q, Afshin A, Yakoob MY, Singh GM, Rehm CD, Khatibzadeh S, on behalf of  
43 39 the Global Burden of Diseases. Nutrition and Chronic Diseases Expert Group  
44 40 (NutriCoDE). Impact of Nonoptimal Intakes of Saturated, Polyunsaturated, and Trans  
45 41 Fat on Global Burdens of Coronary Heart Disease. *J Am Heart Assoc*.  
46 42 2016;5:e002891

13. Stone NJ, Robinson JG, Lichtenstein AH, Noel Bairey Merz C, Blum CB, Eckel RH, et al. 2013 ACC/AHA guideline on the treatment of blood cholesterol to reduce atherosclerotic cardiovascular risk in adults: a report of the American College of Cardiology/American Heart Association Task Force on Practice Guidelines. *Journal of the American College of Cardiology*. 2014;63:2889-934.
14. Sacks FM, Lichtenstein AH, Wu JH, Appel LJ, Creager MA, Kris-Etherton PM, et al. Dietary fats and cardiovascular disease: a presidential advisory from the American Heart Association. *Circulation*. 2017;13:e1-e23.
15. Naja F, Nasreddine L, Itani L, Chamieh MC, Adra N, Sibai AM, et al. Dietary patterns and their association with obesity and sociodemographic factors in a national sample of Lebanese adults. *Public Health Nutrition*. 2011;14:1570-8.
16. Sibai AM, Obeid O, Batal M, Adra N, El Khoury D, Hwalla N. Prevalence and correlates of metabolic syndrome in an adult Lebanese population. *CVD Prevention & Control*. 2008;3:83-90.
17. Sibai AM, Iskandarani M, Darzi A, Nakkash R, Saleh S, Fares S, et al. Cigarette smoking in a Middle Eastern country and its association with hospitalisation use: a nationwide cross-sectional study. *BMJ Open*. 2016;6:e009881.
18. Sibai AM, Hwalla N. WHO STEPS Chronic Disease Risk Factor Surveillance: Data Book for Lebanon. 2010.  
[https://www.who.int/ncds/surveillance/steps/2008\\_STEPS\\_Lebanon.pdf](https://www.who.int/ncds/surveillance/steps/2008_STEPS_Lebanon.pdf)
19. Lavrakas PJ. *Encyclopedia of survey research methods*: Sage Publications; 2008.
20. World Health Organization (WHO). *Noncommunicable diseases and their risk factors- STEPS Manual*. <http://www.who.int/ncds/surveillance/steps/manual/en/>
21. National Cholesterol Education Program Adult Treatment Panel III. Third Report of the National Cholesterol Education Program (NCEP) Expert Panel on Detection, Evaluation, and Treatment of High Blood Cholesterol in Adults (Adult Treatment Panel III) final report. *Circulation*. 2002;106:3143-421.
22. IPAQ Research Committee. *Guidelines for data processing and analysis of the International Physical Activity Questionnaire (IPAQ)—short and long forms*. 2005.
23. Nutritionist IV. *N-squared computing*: Silverton; 1998. 31.
24. Pellet P, Shadarevian S. Food composition. Tables for use in the Middle East. In: *Food composition tables for use in the Middle East*. 2nd ed. 1970.
25. Institute of Medicine. *Dietary Reference Intakes for Energy, Carbohydrate, Fiber, Fat, Fatty Acids, Cholesterol, Protein, and Amino Acids*. Washington, DC: The National Academies Press. 2005; <https://doi.org/10.17226/10490>.
26. Food and Agriculture Organization/World Health Organization. *Interim Summary of Conclusions and Dietary Recommendations on Total Fat & Fatty Acids*. 2008; [https://www.who.int/nutrition/topics/FFA\\_summary\\_rec\\_conclusion.pdf?ua=1](https://www.who.int/nutrition/topics/FFA_summary_rec_conclusion.pdf?ua=1).
27. World Health Organization. *Guideline: Sugars intake for adults and children*. 2015; [http://apps.who.int/iris/bitstream/handle/10665/149782/9789241549028\\_eng.pdf;jssessionid=2A114891D4D08F644AA154370830829B?sequence=1](http://apps.who.int/iris/bitstream/handle/10665/149782/9789241549028_eng.pdf;jssessionid=2A114891D4D08F644AA154370830829B?sequence=1).
28. Yu M, Xu C-X, Zhu H-H, Hu R-Y, Zhang J, Wang H, et al. Associations of cigarette smoking and alcohol consumption with metabolic syndrome in a male Chinese population: a cross-sectional study. *Journal of Epidemiology*. 2014;24:361-9.

- 1  
2  
3 1 29. Berlin I, Lin S, Lima JA, Bertoni AG. Smoking status and metabolic syndrome in the  
4 2 multi-ethnic study of atherosclerosis. A cross-sectional study. *Tobacco Induced*  
5 3 *Diseases*. 2012;10:9-16.
- 6 4 30. Bišanović S, Mehić B, Sivić S. Status of lipids and the frequency diseases of  
7 5 cardiovascular origin in smokers according to the length period of smoking and  
8 6 number of cigarettes smoked daily. *Bosnian Journal of Basic Medical Sciences*.  
9 7 2011;11:46-51.
- 10 8 31. Slagter SN, van Vliet-Ostapchouk JV, Vonk JM, Boezen HM, Dullaart RP, Kobold  
11 9 ACM, et al. Associations between smoking, components of metabolic syndrome and  
12 10 lipoprotein particle size. *BMC Medicine*. 2013;11:195-209.
- 13 11 32. Chen C-C, Li T-C, Chang P-C, Liu C-S, Lin W-Y, Wu M-T, et al. Association among  
14 12 cigarette smoking, metabolic syndrome, and its individual components: the metabolic  
15 13 syndrome study in Taiwan. *Metabolism*. 2008;57:544-8.
- 16 14 33. Campbell SC, Moffatt RJ, Stamford BA. Smoking and smoking cessation—the  
17 15 relationship between cardiovascular disease and lipoprotein metabolism: a review.  
18 16 *Atherosclerosis*. 2008;201:225-35.
- 19 17 34. Maeda K, Noguchi Y, Fukui T. The effects of cessation from cigarette smoking on the  
20 18 lipid and lipoprotein profiles: a meta-analysis. *Preventive Medicine*. 2003;37:283-90.
- 21 19 35. Matsumoto C, Miedema MD, Ofman P, Gaziano JM, Sesso HD. An expanding  
22 20 knowledge of the mechanisms and effects of alcohol consumption on cardiovascular  
23 21 disease. *Journal of Cardiopulmonary Rehabilitation and Prevention*. 2014;34:159-71.
- 24 22 36. Tolstrup JS, Gronbaek M, Nordestgaard BRG. Alcohol intake, myocardial infarction,  
25 23 biochemical risk factors, and alcohol dehydrogenase genotypes. *Circulation:  
26 24 Cardiovascular Genetics*. 2009;2:507-14.
- 27 25 37. Corella D, Portolés O, Arriola L, Chirlaque MD, Barricarte A, Francés F, et al.  
28 26 Saturated fat intake and alcohol consumption modulate the association between the  
29 27 APOE polymorphism and risk of future coronary heart disease: a nested case-control  
30 28 study in the Spanish EPIC cohort. *The Journal of Nutritional Biochemistry*.  
31 29 2011;22:487-94.
- 32 30 38. Perissinotto E, Buja A, Maggi S, Enzi G, Manzato E, Scafato E, et al. Alcohol  
33 31 consumption and cardiovascular risk factors in older lifelong wine drinkers: the  
34 32 Italian Longitudinal Study on Aging. *Nutrition, Metabolism and Cardiovascular  
35 33 Diseases*. 2010;20:647-55.
- 36 34 39. Brinton EA. Effects of ethanol intake on lipoproteins. *Current Atherosclerosis  
37 35 Reports*. 2012;14:108-14.
- 38 36 40. Ellison RC, Zhang Y, Qureshi MM, Knox S, Arnett DK, Province MA. Lifestyle  
39 37 determinants of high-density lipoprotein cholesterol: The national heart, lung, and  
40 38 blood institute family heart study. *American Heart Journal*. 2004;147:529-35.
- 41 39 41. Park H, Kim K. Association of alcohol consumption with lipid profile in hypertensive  
42 40 men. *Alcohol and Alcoholism*. 2012;47:282-7.
- 43 41 42. Corrao G, Rubbiati L, Bagnardi V, Zambon A, Poikolainen K. Alcohol and coronary  
44 42 heart disease: a meta-analysis. *Addiction*. 2000;95:1505-23.

1  
2  
3  
4  
5  
6  
7  
8  
9  
10  
11  
12  
13  
14  
15  
16  
17  
18  
19  
20  
21  
22  
23  
24  
25  
26  
27  
28  
29  
30  
31  
32  
33  
34  
35  
36  
37  
38  
39  
40  
41  
42  
43  
44  
45  
46  
47  
48  
49  
50  
51  
52  
53  
54  
55  
56  
57  
58  
59  
60

- 1 43. Ronksley PE, Brien SE, Turner BJ, Mukamal KJ, Ghali WA. Association of alcohol  
2 consumption with selected cardiovascular disease outcomes: a systematic review and  
3 meta-analysis. *BMJ*. 2011;342:d671.
- 4 44. López EP, Rice C, Weddle DO, Rahill GJ. The relationship among cardiovascular risk  
5 factors, diet patterns, alcohol consumption, and ethnicity among women aged 50 years  
6 and older. *Journal of the American Dietetic Association*. 2008;108:248-56.
- 7 45. Mensink RP. Effects of Saturated Fatty Acids on Serum Lipids and Lipoproteins: A  
8 Systematic Review and Regression Analysis. Geneva, Switzerland: World Health  
9 Organization; 2016.
- 10 46. Slentz CA, Houmard JA, Johnson JL, Bateman LA, Tanner CJ, McCartney JS, et al.  
11 Inactivity, exercise training and detraining, and plasma lipoproteins. STRRIDE: a  
12 randomized, controlled study of exercise intensity and amount. *Journal of Applied  
13 Physiology*. 2007;103:432-42.

**Table 1** Distribution of socio-demographic characteristics, behavioral factors and lipid profile of the study population.

|                                                                  | <b>n</b>        | <b>%</b> |
|------------------------------------------------------------------|-----------------|----------|
| <b>Gender (% female)</b>                                         | 181             | 49.9     |
| <b>Age (mean <math>\pm</math> SD, years)</b>                     | 39.2 $\pm$ 15.2 |          |
| 18-29                                                            | 113             | 31.1     |
| 30-39                                                            | 106             | 29.2     |
| 40-49                                                            | 67              | 18.5     |
| 50-59                                                            | 32              | 8.8      |
| $\geq 60$                                                        | 45              | 12.4     |
| <b>Marital Status</b>                                            |                 |          |
| Single                                                           | 128             | 35.3     |
| Married                                                          | 220             | 60.6     |
| Divorced/widowed                                                 | 15              | 4.1      |
| <b>Work Status</b>                                               |                 |          |
| Student or volunteer                                             | 31              | 8.5      |
| Employed                                                         | 190             | 52.3     |
| Does not work/housewife/retired                                  | 142             | 39.1     |
| <b>Educational Level</b>                                         |                 |          |
| Complementary or less                                            | 144             | 39.7     |
| Secondary or technical                                           | 99              | 27.3     |
| University and above                                             | 120             | 33.1     |
| <b>Cigarette Smoking</b>                                         |                 |          |
| Never smoked                                                     | 227             | 62.5     |
| Past smoker                                                      | 15              | 4.2      |
| Current smoker                                                   | 121             | 33.3     |
| <b>Number of cigarettes smoked/day</b>                           |                 |          |
| 0                                                                | 227             | 62.5     |
| 1-19                                                             | 43              | 11.8     |
| 20-39                                                            | 63              | 17.4     |
| $\geq 40$                                                        | 30              | 8.3      |
| <b>Physical activity</b>                                         |                 |          |
| Low-intensity activity                                           | 151             | 41.6     |
| Moderate-intensity activity                                      | 121             | 33.3     |
| High-intensity activity                                          | 88              | 24.2     |
| <b>Alcohol consumption (ever drinker)</b>                        | 144             | 39.7     |
| <b>Total caloric intake (mean <math>\pm</math> SD, Kcal/day)</b> | 2656 $\pm$ 1249 |          |
| <b>Fat intake (% of total energy)<sup>a</sup></b>                | 36.5 $\pm$ 6.89 |          |
| $\geq 30$ <sup>b</sup>                                           | 275             | 81.6     |
| <b>Saturated fat intake (% of total energy)<sup>a</sup></b>      | 11.4 $\pm$ 2.92 |          |
| $\geq 10$ <sup>c</sup>                                           | 224             | 66.5     |
| <b>Carbohydrates intake (% of total energy)<sup>a</sup></b>      | 49.1 $\pm$ 7.03 |          |
| $\geq 55$ <sup>b</sup>                                           | 71              | 21.1     |
| <b>Sugar (% of total energy)<sup>a</sup></b>                     | 5.7 $\pm$ 4.64  |          |
| $\geq 10$ <sup>d</sup>                                           | 56              | 16.6     |
| <b>Proteins intake (% of total energy)<sup>a</sup></b>           | 152 $\pm$ 2.91  |          |
| $< 15$ <sup>b</sup>                                              | 143             | 42.4     |
| <b>Total Cholesterol (mean <math>\pm</math> SD, mg/dl)</b>       | 210 $\pm$ 45    |          |
| % Elevated total cholesterol ( $\geq 200$ mg/dl) <sup>e</sup>    | 201             | 55.4     |
| <b>Triglycerides (mean <math>\pm</math> SD, mg/dl)</b>           | 138 $\pm$ 78    |          |
| % Elevated triglycerides ( $\geq 150$ mg/dl) <sup>e</sup>        | 114             | 31.4     |

|                                            |          |      |
|--------------------------------------------|----------|------|
| <b>VLDL (mean ± SD, mg/dl)</b>             | 27 ± 15  |      |
| % Elevated VLDL (≥30 mg/dl) <sup>e</sup>   | 106      | 29.2 |
| <b>LDL-C (mean ± SD, mg/dl)</b>            | 131 ± 39 |      |
| % Elevated LDL-C (≥130 mg/dl) <sup>e</sup> | 172      | 47.5 |
| <b>HDL-C (mean ± SD, mg/dl)</b>            | 51 ± 14  |      |
| % Reduced HDL-C (≤40 mg/dl) <sup>e</sup>   | 79       | 21.8 |

<sup>a</sup> Dietary variables are based on a sample of 337 subjects owing to missing data

<sup>b</sup> Macronutrient cutoffs are within the Acceptable Macronutrient Distribution Range (AMDR) <sup>25</sup>

<sup>c</sup> Saturated fat cutoff based on the WHO recommendations <sup>26</sup>

<sup>d</sup> Sugar intake cutoff based on the WHO recommendations <sup>27</sup>

<sup>e</sup> Lipid cutoff values based on the Adult Treatment Panel III guidelines <sup>21</sup>; Very Low Density Lipoprotein (VLDL); Low Density Lipoprotein cholesterol (LDL-C); High Density Lipoprotein cholesterol (HDL-C)

For peer review only

**Table 2a** Logistic regression analysis: associations of behavioral risks with total cholesterol (TC) and triglycerides (TG)

|                                |          | TC              |                  |                      | TG              |                  |                      |
|--------------------------------|----------|-----------------|------------------|----------------------|-----------------|------------------|----------------------|
|                                |          | % ≥200<br>mg/dl | Crude<br>OR (CI) | Adjusted*<br>OR (CI) | % ≥150<br>mg/dl | Crude<br>OR (CI) | Adjusted*<br>OR (CI) |
|                                | 0        | 52.0            | 1.00             | 1.00                 | 25.6            | 1.00             | 1.00                 |
| Number of<br>Cigarettes        | 1-19     | 55.8            | 1.17 (0.60-2.25) | 0.85 (0.40-1.77)     | 30.2            | 1.26 (0.62-2.58) | 1.06 (0.48-2.33)     |
|                                | 20-35    | 63.5            | 1.60 (0.90-2.85) | 1.01 (0.51-2.00)     | 38.1            | 1.79 (0.99-3.23) | 1.30 (0.67-2.53)     |
|                                | ≥40      | 63.3            | 1.59 (0.73-3.50) | 1.24 (0.48-3.18)     | 63.3            | 5.03 (2.26-11.2) | 4.27 (1.69-10.77)    |
|                                | p-trend  |                 | 0.070            | 0.783                |                 | <0.001           | 0.010                |
| Physical activity              | High     | 55.7            | 1.00             | 1                    | 25.0            | 1.00             | 1                    |
|                                | Moderate | 56.2            | 1.02 (0.59-1.77) | 0.89 (0.48-1.67)     | 32.2            | 1.43 (0.77-2.64) | 1.64 (0.83-3.25)     |
|                                | Low      | 55.6            | 0.99 (0.59-1.69) | 1.11 (0.31-2.00)     | 35.1            | 1.62 (0.90-2.92) | 1.75 (0.93-3.29)     |
| Alcohol intake                 | No       | 53              | 1                | 1                    | 31.5            | 1                | 1                    |
|                                | Yes      | 59              | 1.28 (0.84-1.96) | 1.52 (0.90-2.55)     | 31.3            | 0.99 (0.63-1.56) | 0.98 (0.57-1.69)     |
| Total fat intake<br>(% energy) | <30      | 54.8            | 1                | 1.00                 | 30.6            | 1                | 1                    |
|                                | ≥30      | 54.9            | 1.03 (0.57-1.74) | 1.15 (0.62-2.13)     | 31.3            | 1.03 (0.57-1.87) | 1.22 (0.34-2.35)     |
| Saturated Fat<br>(% energy)    | <10      | 52.2            | 1                | 1                    | 31              | 1                | 1                    |
|                                | ≥10      | 56.3            | 1.17 (0.75-1.85) | 1.73 (1.02-2.94)     | 31.3            | 1.01 (0.62-1.65) | 1.01 (0.59-1.74)     |
| Carbohydrates<br>(% energy)    | <55      | 53.8            | 1                | 1                    | 30.8            | 1                | 1                    |
|                                | ≥55      | 59.2            | 1.25 (0.73-2.12) | 1.07 (0.59-1.93)     | 32.4            | 1.07 (0.61-1.88) | 0.96 (0.52-1.76)     |
| Sugar intake<br>(% energy)     | <10      | 54.8            | 1                | 1                    | 32              | 1                | 1                    |
|                                | ≥10      | 55.4            | 1.02 (0.57-1.82) | 1.12 (0.59-2.16)     | 26.8            | 0.78 (0.41-1.48) | 0.86 (0.43-1.73)     |
| Protein intake<br>(% energy)   | <15      | 56.6            | 1                | 1                    | 36.4            | 1                | 1                    |
|                                | ≥15      | 53.6            | 0.88 (0.57-1.37) | 0.83 (0.50-1.37)     | 27.3            | 0.66 (0.41-1.05) | 0.79 (0.47-1.32)     |

\*Controlling for age, gender, education, marital status, caloric intake and BMI

**Table 2b** Logistic regression analysis: associations of behavioral risks with very low-density lipoprotein (VLDL), low-density lipoprotein cholesterol (LDL-C) and high-density lipoprotein cholesterol (HDL-C).

|                                |                   | VLDL          |                  |                      | LDL-C          |                  |                      | HDL-C         |                  |                      |
|--------------------------------|-------------------|---------------|------------------|----------------------|----------------|------------------|----------------------|---------------|------------------|----------------------|
|                                |                   | %≥30<br>mg/dl | Crude<br>OR (CI) | Adjusted*<br>OR (CI) | %≥130<br>mg/dl | Crude<br>OR (CI) | Adjusted*<br>OR (CI) | %<40<br>mg/dl | Crude<br>OR (CI) | Adjusted*<br>OR (CI) |
| Number of<br>Cigarettes        | 0                 | 24.2          | 1.00             | 1                    | 43.6           | 1.00             | 1                    | 18.1          | 1.00             | 1.00                 |
|                                | 1-19              | 27.9          | 1.21 (0.58-2.52) | 1.01 (0.45-2.25)     | 53.5           | 1.49 (0.77-2.86) | 1.12 (0.54-2.33)     | 18.6          | 1.04 (0.45-2.40) | 1.01 (0.39-2.63)     |
|                                | 20-39             | 35.5          | 1.72 (0.94-3.14) | 1.27 (0.64-2.51)     | 54.8           | 1.57 (0.89-2.76) | 0.97 (0.50-1.89)     | 28.6          | 1.81 (0.95-3.45) | 1.61 (0.75-3.45)     |
|                                | ≥40               | 56.7          | 4.09 (1.87-8.95) | 3.26 (1.33-8.03)     | 53.3           | 1.48 (0.69-3.17) | 0.96 (0.39-2.40)     | 40.0          | 3.02 (1.35-6.76) | 1.98 (0.77-5.08)     |
|                                | p-trend           |               | <0.001           | 0.030                |                | 0.078            | 0.946                |               | <0.001           | 0.106                |
| Physical<br>activity           | High              | 26.1          | 1.00             | 1                    | 48.9           | 1.00             | 1                    | 27.3          | 1.00             | 1                    |
|                                | Moderate          | 28.9          | 1.15 (0.62-2.13) | 1.27 (0.54-2.52)     | 49.6           | 1.02 (0.59-1.78) | 0.89 (0.48-1.65)     | 19.0          | 0.62 (0.32-1.20) | 0.93 (0.43-2.01)     |
|                                | Low               | 32.0          | 1.33 (0.74-2.39) | 1.44 (0.76-2.71)     | 46.0           | 0.89 (0.53-1.51) | 0.93 (0.52-1.65)     | 21.2          | 0.72 (0.40-1.32) | 0.69 (0.34-1.39)     |
| Alcohol intake                 | No                | 28.3          | 1                | 1                    | 43.4           | 1                | 1                    | 20.5          | 1                | 1                    |
|                                | Yes               | 30.8          | 1.12 (0.71-1.79) | 1.12 (0.65-1.93)     | 53.8           | 1.53 (1.00-2.33) | 1.68 (1.01-2.82)     | 23.6          | 1.19 (0.72-1.98) | 0.98 (0.54-1.78)     |
| Total fat intake<br>(% energy) | <30               | 29.0          | 1                | 1                    | 45.2           | 1                | 1                    | 25.8          | 1                | 1                    |
|                                | ≥ 30              | 28.8          | 0.99 (0.54-1.82) | 1.15 (0.59-2.22)     | 46.7           | 1.06 (0.61-1.85) | 1.26 (0.69-2.33)     | 21.8          | 0.80 (0.42-1.52) | 0.81 (0.39-1.65)     |
| Saturated Fat<br>(% energy)    | <10               | 29.2          | 1                | 1                    | 44.2           | 1                | 1                    | 20.4          | 1                | 1                    |
|                                | ≥ 10 <sup>s</sup> | 28.7          | 0.98 (0.59-1.61) | 0.96 (0.56-1.66)     | 47.5           | 1.15 (0.72-1.80) | 1.73 (1.02-2.93)     | 23.7          | 1.21 (0.70-2.16) | 1.16 (0.62-2.17)     |
| Carbohydrates<br>(% energy)    | <55               | 28.7          | 1                | 1                    | 45.7           | 1                | 1                    | 22.2          | 1                | 1                    |
|                                | ≥55               | 29.6          | 1.04 (0.59-1.86) | 0.96 (0.52-1.79)     | 49.3           | 1.16 (0.68-1.95) | 0.93 (0.52-1.67)     | 23.9          | 1.10 (0.60-2.05) | 1.18 (0.59-2.36)     |
| Sugar intake<br>(% energy)     | <10               | 29.6          | 1                | 1                    | 47.1           | 1                | 1                    | 23.8          | 1                | 1                    |
|                                | ≥10               | 25.0          | 0.79 (0.41-1.53) | 0.89 (0.44-1.82)     | 42.9           | 0.84 (0.47-1.50) | 0.89 (0.47-1.71)     | 16.1          | 0.61 (0.28-1.31) | 0.62 (0.26-1.45)     |
| Protein intake<br>(% energy)   | <15               | 32.9          | 1                | 1                    | 48.3           | 1                | 1                    | 21            | 1                | 1                    |
|                                | ≥15               | 25.9          | 0.71(0.44-1.15)  | 0.85 (0.50-1.44)     | 45.1           | 0.88 (0.57-1.36) | 0.75 (0.46-1.24)     | 23.7          | 1.17 (0.59-1.97) | 1.49 (0.82-2.72)     |

\*Controlling for age, gender, education, marital status, caloric intake and BMI
